# Supplementary material for: LOXL2 in Cancer: A Two-Decade Perspective
Source: Int J Mol Sci. 2023 Sep 21;24(18):14405. doi: 10.3390/ijms241814405 (PMC10532419; doi:10.3390/ijms241814405)
Supplement: Supplementary file 1 [file ijms-24-14405-s001.zip]

Archive with 5 entries (5 files):
- Dataset S1.xlsx
- Dataset S2.xlsx
- Figure S1.pptx
- Supplementary Materials captions.pdf
- Table S1.pdf
