# Supplementary material for: LOXL2 in Cancer: A Two-Decade Perspective
Source: Int J Mol Sci. 2023 Sep 21;24(18):14405. doi: 10.3390/ijms241814405 (PMC10532419; doi:10.3390/ijms241814405)
Supplement: Supplementary file 1 [file ijms-24-14405-s001.zip › Dataset S1.xlsx]

## Sheet: Sheet1
Dataset S1. LOXL2 in human cancers ( an update of the last 5 years)
Tumor type	Specimen	Associated to Overall survival	Assciated to Disease free status	Metastasis	LOXL2 function/ molecular mechanism	Reference
Osteosarcoma (OS)	Transgenic MM (c-fos)			Yes	c-Fos regulates Loxl2 expression through the Wnt/Zeb1/Zeb2 axis in OS cells.	Matsuoka, K.; Bakiri, L.; Wolff, L.I.; Linder, M.; Mikels-Vigdal, A.; Patiño-García, A.; Lecanda, F.; Hartmann, C.; Sibilia, M.; Wagner, E.F. Wnt Signaling and Loxl2 Promote Aggressive Osteosarcoma. Cell Res 2020, 30, 885–901, doi:10.1038/s41422-020-0370-1.
	Patient samples (public data sets)	Yes			c-FOS/LOXL2 coexpression correlates wit OS aggressiveness and decreased patient survival
Cervical carcinoma (CC)	Patient samples (IHQ/q PCR)	Yes	Yes		High LOXL2 expresion associated to EMT and low OS and DFS in CC.	Cao, C.; Lin, S.; Zhi, W.; Lazare, C.; Meng, Y.; Wu, P.; Gao, P.; Wei, J.; Wu, P. LOXL2 Expression Status Is Correlated With Molecular Characterizations of Cervical Carcinoma and Associated With Poor Cancer Survival via Epithelial-Mesenchymal Transition (EMT) Phenotype. Front Oncol 2020, 10, doi:10.3389/fonc.2020.00284.
	&public data sets (TCGA)
	Bioinformatics				LOXL2 upregulated in CC asociated to EMT and ECM.	Peng, T.; Lin, S.; Meng, Y.; Gao, P.; Wu, P.; Zhi, W.; Ding, W.; Cao, C.; Wu, P. LOXL2 Small Molecule Inhibitor Restrains Malignant Transformation of Cervical Cancer Cells by Repressing LOXL2 -Induced Epithelial-Mesenchymal Transition (EMT). Cell Cycle 2022, 21, 1827–1841, doi:10.1080/15384101.2022.2073047
	Cell lines (LOXL2 inhitor)	NI*	NI		LOXL2 inhibitor ((2-Chloropyridin-4-yl) methanamine hydrochloride) bloks invasion and EMT
Pancreas (PDAC)	Patient sample (public data sets)	Yes			LOXL2 overexpresion associated to OS and agresssive squamous subtype in PDAC patients	Alonso-Nocelo, M.; Ruiz-Cañas, L.; Sancho, P.; Görgülü, K.; Alcalá, S.; Pedrero, C.; Vallespinos, M.; López-Gil, J.C.; Ochando, M.; García-García, E.; et al. Macrophages Direct Cancer Cells through a LOXL2-Mediated Metastatic Cascade in Pancreatic Ductal Adenocarcinoma. Gut 2023, 72, 345–359, doi:10.1136/gutjnl-2021-325564.
	PDXs & GEMM	Yes	NT**	Yes	LOXL2 plays key role in PDAC metastasis through intracellular and extracellular actions.
	Patient samples (TCGA & GEO data sets)	Yes			Reciprocal link between LOXL2, HIF1; and Warburg effect	Li, R.; Li, H.; Zhu, L.; Zhang, X.; Liu, D.; Li, Q.; Ni, B.; Hu, L.; Zhang, Z.; Zhang, Y.; et al. Reciprocal Regulation of LOXL2 and HIF1α Drives the Warburg Effect to Support Pancreatic Cancer Aggressiveness. Cell Death Dis 2021, 12, 1106, doi:10.1038/s41419-021-04391-3.
	PKC Transgenics; xenografts			Yes
	Patient samples (resected)	Yes	Yes		LOXL2 & poor prognosis	Jiang, H.; Torphy, R.J.; Steiger, K.; Hongo, H.; Ritchie, A.J.; Kriegsmann, M.; Horst, D.; Umetsu, S.E.; Joseph, N.M.; McGregor, K.; et al. Pancreatic Ductal Adenocarcinoma Progression Is Restrained by Stromal Matrix. Journal of Clinical Investigation 2020, 130, 4704–4709, doi:10.1172/JCI136760.
	PDA data sets (stromal comp)			Yes	LOX2/stroma protective role in PDAC
Breast	Cell lines & PDXs	NT	NT	NT	LOXL2 associated to TNBC & chromatin compaction (H3K4oxid)	Cebrià-Costa, J.P.; Pascual-Reguant, L.; Gonzalez-Perez, A.; Serra-Bardenys, G.; Querol, J.; Cosín, M.; Verde, G.; Cigliano, R.A.; Sanseverino, W.; Segura-Bayona, S.; et al. LOXL2-Mediated H3K4 Oxidation Reduces Chromatin Accessibility in Triple-Negative Breast Cancer Cells. Oncogene 2020, 39, 79–121, doi:10.1038/s41388-019-0969-1.
	Bioinformatics analysys	Yes	Yes		NA	Ramos, S.; Ferreira, S.; Fernandes, A.S.; Saraiva, N. Lysyl Oxidases Expression and Breast Cancer Progression: A Bioinformatic Analysis. Front Pharmacol 2022, 13, doi:10.3389/fphar.2022.883998.
	Patient samples & cells			Lympahtic invasion	LOXL2 induces Lymphangiogenesis	Wang, C.; Xu, S.; Tian, Y.; Ju, A.; Hou, Q.; Liu, J.; Fu, Y.; Luo, Y. Lysyl Oxidase-Like Protein 2 Promotes Tumor Lymphangiogenesis and Lymph Node Metastasis in Breast Cancer. Neoplasia 2019, 21, 413–427, doi:10.1016/j.neo.2019.03.003.
Esophageal cancer	Patient samples	Yes	Yes		LOXL2/ L2D13 characterized as deacetylase of aldolase A and metabolic reprograming (gliclolisis)	Jiao, J.-W.; Zhan, X.-H.; Wang, J.-J.; He, L.-X.; Guo, Z.-C.; Xu, X.-E.; Liao, L.-D.; Huang, X.; Wen, B.; Xu, Y.-W.; et al. LOXL2-Dependent Deacetylation of Aldolase A Induces Metabolic Reprogramming and Tumor Progression. Redox Biol 2022, 57, 102496, doi:10.1016/j.redox.2022.102496.
	GEMM (kock-in L2D13)	NT	NT	NT
Hepatocellular carcinoma (HCC)	TCGA &Patient samples	Yes	Yes		LOXL2 assoc poor prgonosis, immune infiltration & vasculogenic mimicry	Zhao, N.; Chen, C.; Guo, Y.; Liu, T.; Che, N.; Zhang, D.; Liang, X.; Zhang, Y.; Zhao, X. LOXL2 Serves as a Prognostic Biomarker for Hepatocellular Carcinoma by Mediating Immune Infiltration and Vasculogenic Mimicry. Digestive and Liver Disease 2023, 55, 661–672, doi:10.1016/j.dld.2022.09.003.
Kidney Renal Cell carcinoma (KIRC)	Public databases	Yes	Yes	Yes (nodal)	LOX & LOXL2 overexpresson predicts poor survival in KIRC tumours	Lin, S.; Zheng, L.; Lu, Y.; Xia, Q.; Zhou, P.; Liu, Z. Comprehensive Analysis on the Expression Levels and Prognostic Values of LOX Family Genes in Kidney Renal Clear Cell Carcinoma. Cancer Med 2020, 9, 8624–8638, doi:10.1002/cam4.3472.
Oral squamopus cell carcinoma OSCC	Patient samples	NA***	NA	Yes (nodal)	Cytoplasmic LOXL2 localization associated to nodal stage	Bharti, A.; Urs, A.; Kumar, P. Significance of HIF-1α Expression and LOXL-2 Localization in Progression of Oral Squamous Cell Carcinoma. Asian Pacific Journal of Cancer Prevention 2021, 22, 341–347, doi:10.31557/APJCP.2021.22.2.341.
*NI:----;**NT: ; ***NA: .
