# Supplementary material for: LOXL2 in Cancer: A Two-Decade Perspective
Source: Int J Mol Sci. 2023 Sep 21;24(18):14405. doi: 10.3390/ijms241814405 (PMC10532419; doi:10.3390/ijms241814405)
Supplement: Supplementary file 1 [file ijms-24-14405-s001.zip › Dataset S2.xlsx]

## Sheet: PanCancer mutations
Study ID	Sample ID	Patient ID	Altered	LOXL2	LOXL2: MUT								Gene Symbol	OQL Line	Num Samples Altered	Percent Samples Altered
ucec_tcga_pan_can_atlas_2018	TCGA-EY-A1GK-01	TCGA-EY-A1GK	1	A485T	A485T								LOXL2	LOXL2: MUT;	151	0.014
ucec_tcga_pan_can_atlas_2018	TCGA-AX-A0J1-01	TCGA-AX-A0J1	1	A488T	A488T
luad_tcga_pan_can_atlas_2018	TCGA-49-AAR9-01	TCGA-49-AAR9	1	A547V	A547V
coadread_tcga_pan_can_atlas_2018	TCGA-AA-3811-01	TCGA-AA-3811	1	A54T	A54T
ucec_tcga_pan_can_atlas_2018	TCGA-B5-A11H-01	TCGA-B5-A11H	1	A554V	A554V
ucec_tcga_pan_can_atlas_2018	TCGA-FI-A2F4-01	TCGA-FI-A2F4	1	A584V	A584V
ucec_tcga_pan_can_atlas_2018	TCGA-EO-A22U-01	TCGA-EO-A22U	1	A92T	A92T
gbm_tcga_pan_can_atlas_2018	TCGA-06-5411-01	TCGA-06-5411	1	A93S	A93S
hnsc_tcga_pan_can_atlas_2018	TCGA-QK-A8Z7-01	TCGA-QK-A8Z7	1	D219E	D219E
luad_tcga_pan_can_atlas_2018	TCGA-86-8358-01	TCGA-86-8358	1	D524E	D524E
coadread_tcga_pan_can_atlas_2018	TCGA-CM-6162-01	TCGA-CM-6162	1	D524N	D524N
skcm_tcga_pan_can_atlas_2018	TCGA-EE-A29B-06	TCGA-EE-A29B	1	D85N	D85N
luad_tcga_pan_can_atlas_2018	TCGA-17-Z022-01	TCGA-17-Z022	1	E239D	E239D
skcm_tcga_pan_can_atlas_2018	TCGA-FR-A8YC-06	TCGA-FR-A8YC	1	E269K	E269K
blca_tcga_pan_can_atlas_2018	TCGA-XF-A9T5-01	TCGA-XF-A9T5	1	E445K	E445K
hnsc_tcga_pan_can_atlas_2018	TCGA-CR-6481-01	TCGA-CR-6481	1	E491Q, S581L	E491Q, S581L
blca_tcga_pan_can_atlas_2018	TCGA-XF-A8HD-01	TCGA-XF-A8HD	1	E515K	E515K
hnsc_tcga_pan_can_atlas_2018	TCGA-WA-A7GZ-01	TCGA-WA-A7GZ	1	E545K	E545K
kirc_tcga_pan_can_atlas_2018	TCGA-BP-4964-01	TCGA-BP-4964	1	E576A	E576A
hnsc_tcga_pan_can_atlas_2018	TCGA-CN-A6V1-01	TCGA-CN-A6V1	1	E659Q	E659Q
blca_tcga_pan_can_atlas_2018	TCGA-XF-A8HH-01	TCGA-XF-A8HH	1	E664Q	E664Q
ucec_tcga_pan_can_atlas_2018	TCGA-FI-A2D0-01	TCGA-FI-A2D0	1	E69K	E69K
skcm_tcga_pan_can_atlas_2018	TCGA-FS-A1ZQ-06	TCGA-FS-A1ZQ	1	E754K	E754K
stad_tcga_pan_can_atlas_2018	TCGA-BR-6452-01	TCGA-BR-6452	1	E754K, A584V, V476A, Y242H	E754K, A584V, V476A, Y242H
sarc_tcga_pan_can_atlas_2018	TCGA-QC-A7B5-01	TCGA-QC-A7B5	1	E755K	E755K
skcm_tcga_pan_can_atlas_2018	TCGA-Z2-A8RT-06	TCGA-Z2-A8RT	1	E757K	E757K
ucec_tcga_pan_can_atlas_2018	TCGA-A5-A0G1-01	TCGA-A5-A0G1	1	F166I	F166I
ucec_tcga_pan_can_atlas_2018	TCGA-E6-A1LX-01	TCGA-E6-A1LX	1	F168C	F168C
skcm_tcga_pan_can_atlas_2018	TCGA-D3-A1Q6-06	TCGA-D3-A1Q6	1	F168L	F168L
coadread_tcga_pan_can_atlas_2018	TCGA-AA-3510-01	TCGA-AA-3510	1	F407L	F407L
coadread_tcga_pan_can_atlas_2018	TCGA-AD-6895-01	TCGA-AD-6895	1	F635I	F635I
skcm_tcga_pan_can_atlas_2018	TCGA-D3-A2JO-06	TCGA-D3-A2JO	1	F635L	F635L
stad_tcga_pan_can_atlas_2018	TCGA-BR-4256-01	TCGA-BR-4256	1	F760Vfs*2	F760Vfs*2
lusc_tcga_pan_can_atlas_2018	TCGA-43-7656-01	TCGA-43-7656	1	G119R	G119R
skcm_tcga_pan_can_atlas_2018	TCGA-EE-A2MM-06	TCGA-EE-A2MM	1	G155C	G155C
ov_tcga_pan_can_atlas_2018	TCGA-04-1343-01	TCGA-04-1343	1	G155S	G155S
ucec_tcga_pan_can_atlas_2018	TCGA-AX-A1CE-01	TCGA-AX-A1CE	1	G155S	G155S
ucec_tcga_pan_can_atlas_2018	TCGA-D1-A103-01	TCGA-D1-A103	1	G232D, V95I	G232D, V95I
coadread_tcga_pan_can_atlas_2018	TCGA-G4-6586-01	TCGA-G4-6586	1	G232S	G232S
skcm_tcga_pan_can_atlas_2018	TCGA-D3-A5GS-06	TCGA-D3-A5GS	1	G311R	G311R
ucec_tcga_pan_can_atlas_2018	TCGA-BS-A0UA-01	TCGA-BS-A0UA	1	G311R	G311R
hnsc_tcga_pan_can_atlas_2018	TCGA-CV-7415-01	TCGA-CV-7415	1	G335W	G335W
skcm_tcga_pan_can_atlas_2018	TCGA-EE-A2M8-06	TCGA-EE-A2M8	1	G335W	G335W
ucec_tcga_pan_can_atlas_2018	TCGA-AP-A1DK-01	TCGA-AP-A1DK	1	G382V	G382V
skcm_tcga_pan_can_atlas_2018	TCGA-EE-A3JB-06	TCGA-EE-A3JB	1	G497R	G497R
acc_tcga_pan_can_atlas_2018	TCGA-OR-A5J5-01	TCGA-OR-A5J5	1	G525R	G525R
ucec_tcga_pan_can_atlas_2018	TCGA-AP-A0LM-01	TCGA-AP-A0LM	1	G525R	G525R
lusc_tcga_pan_can_atlas_2018	TCGA-85-6561-01	TCGA-85-6561	1	G525V	G525V
skcm_tcga_pan_can_atlas_2018	TCGA-DA-A1HW-06	TCGA-DA-A1HW	1	G540E	G540E
kich_tcga_pan_can_atlas_2018	TCGA-KN-8428-01	TCGA-KN-8428	1	G540R, V528M	G540R, V528M
ucec_tcga_pan_can_atlas_2018	TCGA-DF-A2KV-01	TCGA-DF-A2KV	1	G677D	G677D
skcm_tcga_pan_can_atlas_2018	TCGA-EE-A181-06	TCGA-EE-A181	1	G738C	G738C
cesc_tcga_pan_can_atlas_2018	TCGA-2W-A8YY-01	TCGA-2W-A8YY	1	G738S, N293H	G738S, N293H
skcm_tcga_pan_can_atlas_2018	TCGA-EE-A2ML-06	TCGA-EE-A2ML	1	G765W	G765W
cesc_tcga_pan_can_atlas_2018	TCGA-VS-A953-01	TCGA-VS-A953	1	H32Q	H32Q
skcm_tcga_pan_can_atlas_2018	TCGA-D3-A1Q5-06	TCGA-D3-A1Q5	1	H389Y	H389Y
skcm_tcga_pan_can_atlas_2018	TCGA-EB-A41A-01	TCGA-EB-A41A	1	H523Y	H523Y
brca_tcga_pan_can_atlas_2018	TCGA-5T-A9QA-01	TCGA-5T-A9QA	1	H67N	H67N
skcm_tcga_pan_can_atlas_2018	TCGA-FS-A4F9-06	TCGA-FS-A4F9	1	H762L	H762L
skcm_tcga_pan_can_atlas_2018	TCGA-FS-A1ZM-06	TCGA-FS-A1ZM	1	H91Y	H91Y
coadread_tcga_pan_can_atlas_2018	TCGA-AG-A002-01	TCGA-AG-A002	1	I217S	I217S
brca_tcga_pan_can_atlas_2018	TCGA-AQ-A0Y5-01	TCGA-AQ-A0Y5	1	K149N	K149N
ucec_tcga_pan_can_atlas_2018	TCGA-AJ-A3EL-01	TCGA-AJ-A3EL	1	K212N	K212N
ucec_tcga_pan_can_atlas_2018	TCGA-A5-A2K5-01	TCGA-A5-A2K5	1	K225N	K225N
ucec_tcga_pan_can_atlas_2018	TCGA-EO-A22R-01	TCGA-EO-A22R	1	K225N	K225N
ucec_tcga_pan_can_atlas_2018	TCGA-AX-A05Z-01	TCGA-AX-A05Z	1	K225T	K225T
lusc_tcga_pan_can_atlas_2018	TCGA-34-7107-01	TCGA-34-7107	1	K406*	K406*
coadread_tcga_pan_can_atlas_2018	TCGA-DM-A1HB-01	TCGA-DM-A1HB	1	K759Sfs*9	K759Sfs*9
stad_tcga_pan_can_atlas_2018	TCGA-BR-8591-01	TCGA-BR-8591	1	K759Sfs*9	K759Sfs*9
brca_tcga_pan_can_atlas_2018	TCGA-D8-A27V-01	TCGA-D8-A27V	1	K759Sfs*9, D699Tfs*32	K759Sfs*9, D699Tfs*32
stad_tcga_pan_can_atlas_2018	TCGA-HU-A4H3-01	TCGA-HU-A4H3	1	K759Sfs*9, R198C	K759Sfs*9, R198C
ucec_tcga_pan_can_atlas_2018	TCGA-AP-A051-01	TCGA-AP-A051	1	L100M, L435M	L100M, L435M
lihc_tcga_pan_can_atlas_2018	TCGA-G3-AAV0-01	TCGA-G3-AAV0	1	L123V	L123V
skcm_tcga_pan_can_atlas_2018	TCGA-IH-A3EA-01	TCGA-IH-A3EA	1	L126F	L126F
ucec_tcga_pan_can_atlas_2018	TCGA-DF-A2KU-01	TCGA-DF-A2KU	1	L18I	L18I
paad_tcga_pan_can_atlas_2018	TCGA-IB-7651-01	TCGA-IB-7651	1	L367M, R198H	L367M, R198H
prad_tcga_pan_can_atlas_2018	TCGA-EJ-5542-01	TCGA-EJ-5542	1	M263I	M263I
laml_tcga_pan_can_atlas_2018	TCGA-AB-2808-03	TCGA-AB-2808	1	M263V	M263V
skcm_tcga_pan_can_atlas_2018	TCGA-D3-A3CF-06	TCGA-D3-A3CF	1	M556I	M556I
ucec_tcga_pan_can_atlas_2018	TCGA-BG-A222-01	TCGA-BG-A222	1	N415D	N415D
ucec_tcga_pan_can_atlas_2018	TCGA-AX-A3G8-01	TCGA-AX-A3G8	1	N578S	N578S
stad_tcga_pan_can_atlas_2018	TCGA-CD-A4MG-01	TCGA-CD-A4MG	1	N728del	N728del
skcm_tcga_pan_can_atlas_2018	TCGA-D3-A51G-06	TCGA-D3-A51G	1	P164S	P164S
kirp_tcga_pan_can_atlas_2018	TCGA-B1-A655-01	TCGA-B1-A655	1	P237L	P237L
skcm_tcga_pan_can_atlas_2018	TCGA-EE-A2MD-06	TCGA-EE-A2MD	1	P324H	P324H
skcm_tcga_pan_can_atlas_2018	TCGA-FW-A3R5-06	TCGA-FW-A3R5	1	P4L	P4L
skcm_tcga_pan_can_atlas_2018	TCGA-ER-A19P-06	TCGA-ER-A19P	1	Q586H, G386*	Q586H, G386*
skcm_tcga_pan_can_atlas_2018	TCGA-GN-A265-06	TCGA-GN-A265	1	Q602K	Q602K
blca_tcga_pan_can_atlas_2018	TCGA-E7-A7XN-01	TCGA-E7-A7XN	1	Q63H	Q63H
coadread_tcga_pan_can_atlas_2018	TCGA-AZ-4315-01	TCGA-AZ-4315	1	R189*	R189*
skcm_tcga_pan_can_atlas_2018	TCGA-D9-A6EC-06	TCGA-D9-A6EC	1	R189*	R189*
ucec_tcga_pan_can_atlas_2018	TCGA-BK-A6W3-01	TCGA-BK-A6W3	1	R189*	R189*
coadread_tcga_pan_can_atlas_2018	TCGA-AA-3956-01	TCGA-AA-3956	1	R196C	R196C
ucec_tcga_pan_can_atlas_2018	TCGA-FI-A2D5-01	TCGA-FI-A2D5	1	R196C	R196C
gbm_tcga_pan_can_atlas_2018	TCGA-06-5416-01	TCGA-06-5416	1	R198C, P21L	R198C, P21L
coadread_tcga_pan_can_atlas_2018	TCGA-AA-3856-01	TCGA-AA-3856	1	R253Q	R253Q
coadread_tcga_pan_can_atlas_2018	TCGA-AG-A02N-01	TCGA-AG-A02N	1	R253W	R253W
coadread_tcga_pan_can_atlas_2018	TCGA-AA-A00N-01	TCGA-AA-A00N	1	R257C	R257C
stad_tcga_pan_can_atlas_2018	TCGA-HU-A4G8-01	TCGA-HU-A4G8	1	R316W	R316W
esca_tcga_pan_can_atlas_2018	TCGA-L5-A4ON-01	TCGA-L5-A4ON	1	R327*	R327*
blca_tcga_pan_can_atlas_2018	TCGA-ZF-AA4W-01	TCGA-ZF-AA4W	1	R338C	R338C
skcm_tcga_pan_can_atlas_2018	TCGA-ER-A195-06	TCGA-ER-A195	1	R365K	R365K
ucec_tcga_pan_can_atlas_2018	TCGA-AP-A1E0-01	TCGA-AP-A1E0	1	R380*	R380*
cesc_tcga_pan_can_atlas_2018	TCGA-VS-A9UJ-01	TCGA-VS-A9UJ	1	R441H	R441H
skcm_tcga_pan_can_atlas_2018	TCGA-GN-A26C-01	TCGA-GN-A26C	1	R441S	R441S
lgg_tcga_pan_can_atlas_2018	TCGA-DU-6392-01	TCGA-DU-6392	1	R447*, T151M, F760S, R595W	R447*, T151M, F760S, R595W
ucec_tcga_pan_can_atlas_2018	TCGA-A5-A0GI-01	TCGA-A5-A0GI	1	R478C	R478C
prad_tcga_pan_can_atlas_2018	TCGA-XK-AAIW-01	TCGA-XK-AAIW	1	R478H	R478H
ov_tcga_pan_can_atlas_2018	TCGA-29-1769-01	TCGA-29-1769	1	R566L	R566L
coadread_tcga_pan_can_atlas_2018	TCGA-AZ-6598-01	TCGA-AZ-6598	1	R566W	R566W
stad_tcga_pan_can_atlas_2018	TCGA-BR-8487-01	TCGA-BR-8487	1	R566W	R566W
ucec_tcga_pan_can_atlas_2018	TCGA-AX-A3FT-01	TCGA-AX-A3FT	1	R598C	R598C
luad_tcga_pan_can_atlas_2018	TCGA-99-8025-01	TCGA-99-8025	1	R59L	R59L
blca_tcga_pan_can_atlas_2018	TCGA-DK-AA6M-01	TCGA-DK-AA6M	1	R690C	R690C
coadread_tcga_pan_can_atlas_2018	TCGA-A6-6653-01	TCGA-A6-6653	1	R690C	R690C
stad_tcga_pan_can_atlas_2018	TCGA-F1-6177-01	TCGA-F1-6177	1	R690H	R690H
coadread_tcga_pan_can_atlas_2018	TCGA-AA-3986-01	TCGA-AA-3986	1	R71W	R71W
skcm_tcga_pan_can_atlas_2018	TCGA-EE-A29S-06	TCGA-EE-A29S	1	R71W	R71W
esca_tcga_pan_can_atlas_2018	TCGA-L5-A4OI-01	TCGA-L5-A4OI	1	R98Q	R98Q
ucec_tcga_pan_can_atlas_2018	TCGA-AX-A2HD-01	TCGA-AX-A2HD	1	S171L	S171L
ucec_tcga_pan_can_atlas_2018	TCGA-BS-A0UF-01	TCGA-BS-A0UF	1	S171L	S171L
ucec_tcga_pan_can_atlas_2018	TCGA-AP-A056-01	TCGA-AP-A056	1	S171L, R522C	S171L, R522C
skcm_tcga_pan_can_atlas_2018	TCGA-FS-A4FB-06	TCGA-FS-A4FB	1	S262F	S262F
skcm_tcga_pan_can_atlas_2018	TCGA-D3-A8GM-06	TCGA-D3-A8GM	1	S313L	S313L
coadread_tcga_pan_can_atlas_2018	TCGA-AA-3977-01	TCGA-AA-3977	1	S359L	S359L
ucec_tcga_pan_can_atlas_2018	TCGA-AX-A0J0-01	TCGA-AX-A0J0	1	S359L	S359L
ucec_tcga_pan_can_atlas_2018	TCGA-BS-A0TA-01	TCGA-BS-A0TA	1	S401Vfs*149	S401Vfs*149
blca_tcga_pan_can_atlas_2018	TCGA-E7-A6MD-01	TCGA-E7-A6MD	1	T146I	T146I
coadread_tcga_pan_can_atlas_2018	TCGA-AG-3893-01	TCGA-AG-3893	1	T151M	T151M
stad_tcga_pan_can_atlas_2018	TCGA-BR-4257-01	TCGA-BR-4257	1	T266A	T266A
skcm_tcga_pan_can_atlas_2018	TCGA-W3-AA1R-06	TCGA-W3-AA1R	1	T266I	T266I
esca_tcga_pan_can_atlas_2018	TCGA-L5-A8NL-01	TCGA-L5-A8NL	1	T546I	T546I
skcm_tcga_pan_can_atlas_2018	TCGA-EB-A4P0-01	TCGA-EB-A4P0	1	T561I	T561I
ov_tcga_pan_can_atlas_2018	TCGA-24-1842-01	TCGA-24-1842	1	T591M	T591M
kirc_tcga_pan_can_atlas_2018	TCGA-B0-5077-01	TCGA-B0-5077	1	V145I	V145I
stad_tcga_pan_can_atlas_2018	TCGA-BR-8081-01	TCGA-BR-8081	1	V206M	V206M
stad_tcga_pan_can_atlas_2018	TCGA-FP-A4BE-01	TCGA-FP-A4BE	1	V229M	V229M
esca_tcga_pan_can_atlas_2018	TCGA-L5-A4OW-01	TCGA-L5-A4OW	1	V302E	V302E
ucec_tcga_pan_can_atlas_2018	TCGA-EC-A24G-01	TCGA-EC-A24G	1	V339M, E755K	V339M, E755K
skcm_tcga_pan_can_atlas_2018	TCGA-ER-A19W-06	TCGA-ER-A19W	1	V72A	V72A
ucec_tcga_pan_can_atlas_2018	TCGA-B5-A0K9-01	TCGA-B5-A0K9	1	V83M	V83M
skcm_tcga_pan_can_atlas_2018	TCGA-D3-A2JG-06	TCGA-D3-A2JG	1	W143C	W143C
blca_tcga_pan_can_atlas_2018	TCGA-E7-A4IJ-01	TCGA-E7-A4IJ	1	W355*	W355*
coadread_tcga_pan_can_atlas_2018	TCGA-D5-6930-01	TCGA-D5-6930	1	W460G	W460G
skcm_tcga_pan_can_atlas_2018	TCGA-D3-A2JP-06	TCGA-D3-A2JP	1	W686L	W686L
luad_tcga_pan_can_atlas_2018	TCGA-05-4396-01	TCGA-05-4396	1	W697L	W697L
hnsc_tcga_pan_can_atlas_2018	TCGA-F7-A624-01	TCGA-F7-A624	1	W742*, V74M	W742*, V74M
acc_tcga_pan_can_atlas_2018	TCGA-OR-A5KB-01	TCGA-OR-A5KB	1	X384_splice	X384_splice
skcm_tcga_pan_can_atlas_2018	TCGA-W3-AA1V-06	TCGA-W3-AA1V	1	X491_splice	X491_splice
skcm_tcga_pan_can_atlas_2018	TCGA-EB-A44O-01	TCGA-EB-A44O	1	X711_splice	X711_splice
coadread_tcga_pan_can_atlas_2018	TCGA-AA-3663-01	TCGA-AA-3663	1	Y319C	Y319C

## Sheet: PanCancer gene copy alterations
Gene copy alterations affecting LOXL2 locus
track_name	Study of origin	# Samples per Patient	LOXL2
TCGA-AB-2803	Acute Myeloid Leukemia (TCGA, PanCancer Atlas)	1
TCGA-AB-2804	Acute Myeloid Leukemia (TCGA, PanCancer Atlas)	1
TCGA-AB-2805	Acute Myeloid Leukemia (TCGA, PanCancer Atlas)	1
TCGA-AB-2806	Acute Myeloid Leukemia (TCGA, PanCancer Atlas)	1
TCGA-AB-2807	Acute Myeloid Leukemia (TCGA, PanCancer Atlas)	1
TCGA-AB-2808	Acute Myeloid Leukemia (TCGA, PanCancer Atlas)	1
TCGA-AB-2809	Acute Myeloid Leukemia (TCGA, PanCancer Atlas)	1
TCGA-AB-2810	Acute Myeloid Leukemia (TCGA, PanCancer Atlas)	1
TCGA-AB-2811	Acute Myeloid Leukemia (TCGA, PanCancer Atlas)	1
TCGA-AB-2812	Acute Myeloid Leukemia (TCGA, PanCancer Atlas)	1
TCGA-AB-2813	Acute Myeloid Leukemia (TCGA, PanCancer Atlas)	1
TCGA-AB-2814	Acute Myeloid Leukemia (TCGA, PanCancer Atlas)	1
TCGA-AB-2815	Acute Myeloid Leukemia (TCGA, PanCancer Atlas)	1
TCGA-AB-2816	Acute Myeloid Leukemia (TCGA, PanCancer Atlas)	1
TCGA-AB-2817	Acute Myeloid Leukemia (TCGA, PanCancer Atlas)	1
TCGA-AB-2818	Acute Myeloid Leukemia (TCGA, PanCancer Atlas)	1
TCGA-AB-2819	Acute Myeloid Leukemia (TCGA, PanCancer Atlas)	1
TCGA-AB-2820	Acute Myeloid Leukemia (TCGA, PanCancer Atlas)	1
TCGA-AB-2821	Acute Myeloid Leukemia (TCGA, PanCancer Atlas)	1
TCGA-AB-2822	Acute Myeloid Leukemia (TCGA, PanCancer Atlas)	1
TCGA-AB-2823	Acute Myeloid Leukemia (TCGA, PanCancer Atlas)	1
TCGA-AB-2824	Acute Myeloid Leukemia (TCGA, PanCancer Atlas)	1
TCGA-AB-2825	Acute Myeloid Leukemia (TCGA, PanCancer Atlas)	1
TCGA-AB-2826	Acute Myeloid Leukemia (TCGA, PanCancer Atlas)	1
TCGA-AB-2827	Acute Myeloid Leukemia (TCGA, PanCancer Atlas)	1
TCGA-AB-2828	Acute Myeloid Leukemia (TCGA, PanCancer Atlas)	1
TCGA-AB-2829	Acute Myeloid Leukemia (TCGA, PanCancer Atlas)	1
TCGA-AB-2830	Acute Myeloid Leukemia (TCGA, PanCancer Atlas)	1
TCGA-AB-2831	Acute Myeloid Leukemia (TCGA, PanCancer Atlas)	1
TCGA-AB-2832	Acute Myeloid Leukemia (TCGA, PanCancer Atlas)	1
TCGA-AB-2834	Acute Myeloid Leukemia (TCGA, PanCancer Atlas)	1
TCGA-AB-2835	Acute Myeloid Leukemia (TCGA, PanCancer Atlas)	1
TCGA-AB-2836	Acute Myeloid Leukemia (TCGA, PanCancer Atlas)	1
TCGA-AB-2837	Acute Myeloid Leukemia (TCGA, PanCancer Atlas)	1
TCGA-AB-2838	Acute Myeloid Leukemia (TCGA, PanCancer Atlas)	1
TCGA-AB-2839	Acute Myeloid Leukemia (TCGA, PanCancer Atlas)	1
TCGA-AB-2840	Acute Myeloid Leukemia (TCGA, PanCancer Atlas)	1
TCGA-AB-2841	Acute Myeloid Leukemia (TCGA, PanCancer Atlas)	1
TCGA-AB-2842	Acute Myeloid Leukemia (TCGA, PanCancer Atlas)	1
TCGA-AB-2844	Acute Myeloid Leukemia (TCGA, PanCancer Atlas)	1
TCGA-AB-2845	Acute Myeloid Leukemia (TCGA, PanCancer Atlas)	1
TCGA-AB-2846	Acute Myeloid Leukemia (TCGA, PanCancer Atlas)	1
TCGA-AB-2848	Acute Myeloid Leukemia (TCGA, PanCancer Atlas)	1
TCGA-AB-2849	Acute Myeloid Leukemia (TCGA, PanCancer Atlas)	1
TCGA-AB-2850	Acute Myeloid Leukemia (TCGA, PanCancer Atlas)	1
TCGA-AB-2851	Acute Myeloid Leukemia (TCGA, PanCancer Atlas)	1
TCGA-AB-2853	Acute Myeloid Leukemia (TCGA, PanCancer Atlas)	1
TCGA-AB-2854	Acute Myeloid Leukemia (TCGA, PanCancer Atlas)	1
TCGA-AB-2855	Acute Myeloid Leukemia (TCGA, PanCancer Atlas)	1
TCGA-AB-2856	Acute Myeloid Leukemia (TCGA, PanCancer Atlas)	1
TCGA-AB-2857	Acute Myeloid Leukemia (TCGA, PanCancer Atlas)	1
TCGA-AB-2858	Acute Myeloid Leukemia (TCGA, PanCancer Atlas)	1
TCGA-AB-2859	Acute Myeloid Leukemia (TCGA, PanCancer Atlas)	1
TCGA-AB-2860	Acute Myeloid Leukemia (TCGA, PanCancer Atlas)	1
TCGA-AB-2861	Acute Myeloid Leukemia (TCGA, PanCancer Atlas)	1
TCGA-AB-2862	Acute Myeloid Leukemia (TCGA, PanCancer Atlas)	1
TCGA-AB-2863	Acute Myeloid Leukemia (TCGA, PanCancer Atlas)	1
TCGA-AB-2864	Acute Myeloid Leukemia (TCGA, PanCancer Atlas)	1
TCGA-AB-2865	Acute Myeloid Leukemia (TCGA, PanCancer Atlas)	1
TCGA-AB-2866	Acute Myeloid Leukemia (TCGA, PanCancer Atlas)	1
TCGA-AB-2867	Acute Myeloid Leukemia (TCGA, PanCancer Atlas)	1
TCGA-AB-2868	Acute Myeloid Leukemia (TCGA, PanCancer Atlas)	1
TCGA-AB-2869	Acute Myeloid Leukemia (TCGA, PanCancer Atlas)	1
TCGA-AB-2870	Acute Myeloid Leukemia (TCGA, PanCancer Atlas)	1
TCGA-AB-2871	Acute Myeloid Leukemia (TCGA, PanCancer Atlas)	1
TCGA-AB-2872	Acute Myeloid Leukemia (TCGA, PanCancer Atlas)	1
TCGA-AB-2873	Acute Myeloid Leukemia (TCGA, PanCancer Atlas)	1
TCGA-AB-2874	Acute Myeloid Leukemia (TCGA, PanCancer Atlas)	1
TCGA-AB-2875	Acute Myeloid Leukemia (TCGA, PanCancer Atlas)	1
TCGA-AB-2877	Acute Myeloid Leukemia (TCGA, PanCancer Atlas)	1
TCGA-AB-2878	Acute Myeloid Leukemia (TCGA, PanCancer Atlas)	1
TCGA-AB-2879	Acute Myeloid Leukemia (TCGA, PanCancer Atlas)	1
TCGA-AB-2880	Acute Myeloid Leukemia (TCGA, PanCancer Atlas)	1
TCGA-AB-2881	Acute Myeloid Leukemia (TCGA, PanCancer Atlas)	1
TCGA-AB-2882	Acute Myeloid Leukemia (TCGA, PanCancer Atlas)	1
TCGA-AB-2883	Acute Myeloid Leukemia (TCGA, PanCancer Atlas)	1
TCGA-AB-2884	Acute Myeloid Leukemia (TCGA, PanCancer Atlas)	1
TCGA-AB-2885	Acute Myeloid Leukemia (TCGA, PanCancer Atlas)	1
TCGA-AB-2886	Acute Myeloid Leukemia (TCGA, PanCancer Atlas)	1
TCGA-AB-2887	Acute Myeloid Leukemia (TCGA, PanCancer Atlas)	1
TCGA-AB-2888	Acute Myeloid Leukemia (TCGA, PanCancer Atlas)	1
TCGA-AB-2889	Acute Myeloid Leukemia (TCGA, PanCancer Atlas)	1
TCGA-AB-2890	Acute Myeloid Leukemia (TCGA, PanCancer Atlas)	1
TCGA-AB-2892	Acute Myeloid Leukemia (TCGA, PanCancer Atlas)	1
TCGA-AB-2893	Acute Myeloid Leukemia (TCGA, PanCancer Atlas)	1
TCGA-AB-2894	Acute Myeloid Leukemia (TCGA, PanCancer Atlas)	1
TCGA-AB-2895	Acute Myeloid Leukemia (TCGA, PanCancer Atlas)	1
TCGA-AB-2896	Acute Myeloid Leukemia (TCGA, PanCancer Atlas)	1
TCGA-AB-2897	Acute Myeloid Leukemia (TCGA, PanCancer Atlas)	1
TCGA-AB-2898	Acute Myeloid Leukemia (TCGA, PanCancer Atlas)	1
TCGA-AB-2899	Acute Myeloid Leukemia (TCGA, PanCancer Atlas)	1
TCGA-AB-2900	Acute Myeloid Leukemia (TCGA, PanCancer Atlas)	1
TCGA-AB-2901	Acute Myeloid Leukemia (TCGA, PanCancer Atlas)	1
TCGA-AB-2903	Acute Myeloid Leukemia (TCGA, PanCancer Atlas)	1
TCGA-AB-2904	Acute Myeloid Leukemia (TCGA, PanCancer Atlas)	1
TCGA-AB-2905	Acute Myeloid Leukemia (TCGA, PanCancer Atlas)	1
TCGA-AB-2906	Acute Myeloid Leukemia (TCGA, PanCancer Atlas)	1
TCGA-AB-2907	Acute Myeloid Leukemia (TCGA, PanCancer Atlas)	1
TCGA-AB-2908	Acute Myeloid Leukemia (TCGA, PanCancer Atlas)	1
TCGA-AB-2909	Acute Myeloid Leukemia (TCGA, PanCancer Atlas)	1
TCGA-AB-2910	Acute Myeloid Leukemia (TCGA, PanCancer Atlas)	1
TCGA-AB-2911	Acute Myeloid Leukemia (TCGA, PanCancer Atlas)	1
TCGA-AB-2912	Acute Myeloid Leukemia (TCGA, PanCancer Atlas)	1
TCGA-AB-2913	Acute Myeloid Leukemia (TCGA, PanCancer Atlas)	1
TCGA-AB-2914	Acute Myeloid Leukemia (TCGA, PanCancer Atlas)	1
TCGA-AB-2915	Acute Myeloid Leukemia (TCGA, PanCancer Atlas)	1
TCGA-AB-2916	Acute Myeloid Leukemia (TCGA, PanCancer Atlas)	1
TCGA-AB-2917	Acute Myeloid Leukemia (TCGA, PanCancer Atlas)	1
TCGA-AB-2919	Acute Myeloid Leukemia (TCGA, PanCancer Atlas)	1
TCGA-AB-2920	Acute Myeloid Leukemia (TCGA, PanCancer Atlas)	1
TCGA-AB-2921	Acute Myeloid Leukemia (TCGA, PanCancer Atlas)	1
TCGA-AB-2922	Acute Myeloid Leukemia (TCGA, PanCancer Atlas)	1
TCGA-AB-2923	Acute Myeloid Leukemia (TCGA, PanCancer Atlas)	1
TCGA-AB-2924	Acute Myeloid Leukemia (TCGA, PanCancer Atlas)	1
TCGA-AB-2925	Acute Myeloid Leukemia (TCGA, PanCancer Atlas)	1
TCGA-AB-2926	Acute Myeloid Leukemia (TCGA, PanCancer Atlas)	1
TCGA-AB-2927	Acute Myeloid Leukemia (TCGA, PanCancer Atlas)	1
TCGA-AB-2928	Acute Myeloid Leukemia (TCGA, PanCancer Atlas)	1
TCGA-AB-2929	Acute Myeloid Leukemia (TCGA, PanCancer Atlas)	1
TCGA-AB-2930	Acute Myeloid Leukemia (TCGA, PanCancer Atlas)	1
TCGA-AB-2931	Acute Myeloid Leukemia (TCGA, PanCancer Atlas)	1
TCGA-AB-2932	Acute Myeloid Leukemia (TCGA, PanCancer Atlas)	1
TCGA-AB-2933	Acute Myeloid Leukemia (TCGA, PanCancer Atlas)	1
TCGA-AB-2934	Acute Myeloid Leukemia (TCGA, PanCancer Atlas)	1
TCGA-AB-2935	Acute Myeloid Leukemia (TCGA, PanCancer Atlas)	1
TCGA-AB-2936	Acute Myeloid Leukemia (TCGA, PanCancer Atlas)	1
TCGA-AB-2937	Acute Myeloid Leukemia (TCGA, PanCancer Atlas)	1
TCGA-AB-2938	Acute Myeloid Leukemia (TCGA, PanCancer Atlas)	1
TCGA-AB-2939	Acute Myeloid Leukemia (TCGA, PanCancer Atlas)	1
TCGA-AB-2940	Acute Myeloid Leukemia (TCGA, PanCancer Atlas)	1
TCGA-AB-2941	Acute Myeloid Leukemia (TCGA, PanCancer Atlas)	1
TCGA-AB-2942	Acute Myeloid Leukemia (TCGA, PanCancer Atlas)	1
TCGA-AB-2943	Acute Myeloid Leukemia (TCGA, PanCancer Atlas)	1
TCGA-AB-2944	Acute Myeloid Leukemia (TCGA, PanCancer Atlas)	1
TCGA-AB-2945	Acute Myeloid Leukemia (TCGA, PanCancer Atlas)	1
TCGA-AB-2946	Acute Myeloid Leukemia (TCGA, PanCancer Atlas)	1
TCGA-AB-2947	Acute Myeloid Leukemia (TCGA, PanCancer Atlas)	1
TCGA-AB-2948	Acute Myeloid Leukemia (TCGA, PanCancer Atlas)	1
TCGA-AB-2949	Acute Myeloid Leukemia (TCGA, PanCancer Atlas)	1
TCGA-AB-2950	Acute Myeloid Leukemia (TCGA, PanCancer Atlas)	1
TCGA-AB-2952	Acute Myeloid Leukemia (TCGA, PanCancer Atlas)	1
TCGA-AB-2954	Acute Myeloid Leukemia (TCGA, PanCancer Atlas)	1
TCGA-AB-2955	Acute Myeloid Leukemia (TCGA, PanCancer Atlas)	1
TCGA-AB-2956	Acute Myeloid Leukemia (TCGA, PanCancer Atlas)	1
TCGA-AB-2957	Acute Myeloid Leukemia (TCGA, PanCancer Atlas)	1
TCGA-AB-2959	Acute Myeloid Leukemia (TCGA, PanCancer Atlas)	1
TCGA-AB-2963	Acute Myeloid Leukemia (TCGA, PanCancer Atlas)	1
TCGA-AB-2964	Acute Myeloid Leukemia (TCGA, PanCancer Atlas)	1
TCGA-AB-2965	Acute Myeloid Leukemia (TCGA, PanCancer Atlas)	1
TCGA-AB-2966	Acute Myeloid Leukemia (TCGA, PanCancer Atlas)	1
TCGA-AB-2967	Acute Myeloid Leukemia (TCGA, PanCancer Atlas)	1
TCGA-AB-2968	Acute Myeloid Leukemia (TCGA, PanCancer Atlas)	1
TCGA-AB-2969	Acute Myeloid Leukemia (TCGA, PanCancer Atlas)	1
TCGA-AB-2970	Acute Myeloid Leukemia (TCGA, PanCancer Atlas)	1
TCGA-AB-2971	Acute Myeloid Leukemia (TCGA, PanCancer Atlas)	1
TCGA-AB-2972	Acute Myeloid Leukemia (TCGA, PanCancer Atlas)	1
TCGA-AB-2973	Acute Myeloid Leukemia (TCGA, PanCancer Atlas)	1
TCGA-AB-2974	Acute Myeloid Leukemia (TCGA, PanCancer Atlas)	1
TCGA-AB-2975	Acute Myeloid Leukemia (TCGA, PanCancer Atlas)	1
TCGA-AB-2976	Acute Myeloid Leukemia (TCGA, PanCancer Atlas)	1
TCGA-AB-2977	Acute Myeloid Leukemia (TCGA, PanCancer Atlas)	1
TCGA-AB-2978	Acute Myeloid Leukemia (TCGA, PanCancer Atlas)	1
TCGA-AB-2980	Acute Myeloid Leukemia (TCGA, PanCancer Atlas)	1
TCGA-AB-2982	Acute Myeloid Leukemia (TCGA, PanCancer Atlas)	1
TCGA-AB-2983	Acute Myeloid Leukemia (TCGA, PanCancer Atlas)	1
TCGA-AB-2984	Acute Myeloid Leukemia (TCGA, PanCancer Atlas)	1
TCGA-AB-2985	Acute Myeloid Leukemia (TCGA, PanCancer Atlas)	1
TCGA-AB-2986	Acute Myeloid Leukemia (TCGA, PanCancer Atlas)	1
TCGA-AB-2987	Acute Myeloid Leukemia (TCGA, PanCancer Atlas)	1
TCGA-AB-2988	Acute Myeloid Leukemia (TCGA, PanCancer Atlas)	1
TCGA-AB-2989	Acute Myeloid Leukemia (TCGA, PanCancer Atlas)	1
TCGA-AB-2990	Acute Myeloid Leukemia (TCGA, PanCancer Atlas)	1
TCGA-AB-2991	Acute Myeloid Leukemia (TCGA, PanCancer Atlas)	1
TCGA-AB-2992	Acute Myeloid Leukemia (TCGA, PanCancer Atlas)	1
TCGA-AB-2993	Acute Myeloid Leukemia (TCGA, PanCancer Atlas)	1
TCGA-AB-2994	Acute Myeloid Leukemia (TCGA, PanCancer Atlas)	1
TCGA-AB-2995	Acute Myeloid Leukemia (TCGA, PanCancer Atlas)	1
TCGA-AB-2996	Acute Myeloid Leukemia (TCGA, PanCancer Atlas)	1
TCGA-AB-2997	Acute Myeloid Leukemia (TCGA, PanCancer Atlas)	1
TCGA-AB-2998	Acute Myeloid Leukemia (TCGA, PanCancer Atlas)	1
TCGA-AB-2999	Acute Myeloid Leukemia (TCGA, PanCancer Atlas)	1
TCGA-AB-3000	Acute Myeloid Leukemia (TCGA, PanCancer Atlas)	1
TCGA-AB-3001	Acute Myeloid Leukemia (TCGA, PanCancer Atlas)	1
TCGA-AB-3002	Acute Myeloid Leukemia (TCGA, PanCancer Atlas)	1
TCGA-AB-3005	Acute Myeloid Leukemia (TCGA, PanCancer Atlas)	1
TCGA-AB-3006	Acute Myeloid Leukemia (TCGA, PanCancer Atlas)	1
TCGA-AB-3007	Acute Myeloid Leukemia (TCGA, PanCancer Atlas)	1
TCGA-AB-3008	Acute Myeloid Leukemia (TCGA, PanCancer Atlas)	1
TCGA-AB-3009	Acute Myeloid Leukemia (TCGA, PanCancer Atlas)	1
TCGA-AB-3011	Acute Myeloid Leukemia (TCGA, PanCancer Atlas)	1
TCGA-AB-3012	Acute Myeloid Leukemia (TCGA, PanCancer Atlas)	1
TCGA-AB-2802	Acute Myeloid Leukemia (TCGA, PanCancer Atlas)	1
TCGA-AB-2833	Acute Myeloid Leukemia (TCGA, PanCancer Atlas)	1
TCGA-AB-2843	Acute Myeloid Leukemia (TCGA, PanCancer Atlas)	1
TCGA-AB-2847	Acute Myeloid Leukemia (TCGA, PanCancer Atlas)	1
TCGA-AB-2876	Acute Myeloid Leukemia (TCGA, PanCancer Atlas)	1
TCGA-AB-2891	Acute Myeloid Leukemia (TCGA, PanCancer Atlas)	1
TCGA-AB-2918	Acute Myeloid Leukemia (TCGA, PanCancer Atlas)	1
TCGA-AB-2979	Acute Myeloid Leukemia (TCGA, PanCancer Atlas)	1
TCGA-AB-2981	Acute Myeloid Leukemia (TCGA, PanCancer Atlas)	1
TCGA-OR-A5J1	Adrenocortical Carcinoma (TCGA, PanCancer Atlas)	1
TCGA-OR-A5J2	Adrenocortical Carcinoma (TCGA, PanCancer Atlas)	1
TCGA-OR-A5J3	Adrenocortical Carcinoma (TCGA, PanCancer Atlas)	1
TCGA-OR-A5J4	Adrenocortical Carcinoma (TCGA, PanCancer Atlas)	1
TCGA-OR-A5J5	Adrenocortical Carcinoma (TCGA, PanCancer Atlas)	1
TCGA-OR-A5J6	Adrenocortical Carcinoma (TCGA, PanCancer Atlas)	1
TCGA-OR-A5J7	Adrenocortical Carcinoma (TCGA, PanCancer Atlas)	1
TCGA-OR-A5J8	Adrenocortical Carcinoma (TCGA, PanCancer Atlas)	1
TCGA-OR-A5J9	Adrenocortical Carcinoma (TCGA, PanCancer Atlas)	1
TCGA-OR-A5JA	Adrenocortical Carcinoma (TCGA, PanCancer Atlas)	1
TCGA-OR-A5JB	Adrenocortical Carcinoma (TCGA, PanCancer Atlas)	1
TCGA-OR-A5JC	Adrenocortical Carcinoma (TCGA, PanCancer Atlas)	1
TCGA-OR-A5JD	Adrenocortical Carcinoma (TCGA, PanCancer Atlas)	1
TCGA-OR-A5JE	Adrenocortical Carcinoma (TCGA, PanCancer Atlas)	1
TCGA-OR-A5JF	Adrenocortical Carcinoma (TCGA, PanCancer Atlas)	1
TCGA-OR-A5JG	Adrenocortical Carcinoma (TCGA, PanCancer Atlas)	1
TCGA-OR-A5JH	Adrenocortical Carcinoma (TCGA, PanCancer Atlas)	1
TCGA-OR-A5JI	Adrenocortical Carcinoma (TCGA, PanCancer Atlas)	1
TCGA-OR-A5JJ	Adrenocortical Carcinoma (TCGA, PanCancer Atlas)	1
TCGA-OR-A5JK	Adrenocortical Carcinoma (TCGA, PanCancer Atlas)	1
TCGA-OR-A5JL	Adrenocortical Carcinoma (TCGA, PanCancer Atlas)	1
TCGA-OR-A5JM	Adrenocortical Carcinoma (TCGA, PanCancer Atlas)	1
TCGA-OR-A5JO	Adrenocortical Carcinoma (TCGA, PanCancer Atlas)	1
TCGA-OR-A5JP	Adrenocortical Carcinoma (TCGA, PanCancer Atlas)	1
TCGA-OR-A5JQ	Adrenocortical Carcinoma (TCGA, PanCancer Atlas)	1
TCGA-OR-A5JR	Adrenocortical Carcinoma (TCGA, PanCancer Atlas)	1
TCGA-OR-A5JS	Adrenocortical Carcinoma (TCGA, PanCancer Atlas)	1
TCGA-OR-A5JT	Adrenocortical Carcinoma (TCGA, PanCancer Atlas)	1
TCGA-OR-A5JU	Adrenocortical Carcinoma (TCGA, PanCancer Atlas)	1
TCGA-OR-A5JV	Adrenocortical Carcinoma (TCGA, PanCancer Atlas)	1
TCGA-OR-A5JW	Adrenocortical Carcinoma (TCGA, PanCancer Atlas)	1
TCGA-OR-A5JX	Adrenocortical Carcinoma (TCGA, PanCancer Atlas)	1
TCGA-OR-A5JY	Adrenocortical Carcinoma (TCGA, PanCancer Atlas)	1
TCGA-OR-A5JZ	Adrenocortical Carcinoma (TCGA, PanCancer Atlas)	1
TCGA-OR-A5K0	Adrenocortical Carcinoma (TCGA, PanCancer Atlas)	1
TCGA-OR-A5K1	Adrenocortical Carcinoma (TCGA, PanCancer Atlas)	1
TCGA-OR-A5K2	Adrenocortical Carcinoma (TCGA, PanCancer Atlas)	1
TCGA-OR-A5K3	Adrenocortical Carcinoma (TCGA, PanCancer Atlas)	1
TCGA-OR-A5K4	Adrenocortical Carcinoma (TCGA, PanCancer Atlas)	1
TCGA-OR-A5K5	Adrenocortical Carcinoma (TCGA, PanCancer Atlas)	1
TCGA-OR-A5K6	Adrenocortical Carcinoma (TCGA, PanCancer Atlas)	1
TCGA-OR-A5K8	Adrenocortical Carcinoma (TCGA, PanCancer Atlas)	1
TCGA-OR-A5K9	Adrenocortical Carcinoma (TCGA, PanCancer Atlas)	1
TCGA-OR-A5KB	Adrenocortical Carcinoma (TCGA, PanCancer Atlas)	1
TCGA-OR-A5KO	Adrenocortical Carcinoma (TCGA, PanCancer Atlas)	1
TCGA-OR-A5KP	Adrenocortical Carcinoma (TCGA, PanCancer Atlas)	1
TCGA-OR-A5KQ	Adrenocortical Carcinoma (TCGA, PanCancer Atlas)	1
TCGA-OR-A5KS	Adrenocortical Carcinoma (TCGA, PanCancer Atlas)	1
TCGA-OR-A5KT	Adrenocortical Carcinoma (TCGA, PanCancer Atlas)	1
TCGA-OR-A5KU	Adrenocortical Carcinoma (TCGA, PanCancer Atlas)	1
TCGA-OR-A5KV	Adrenocortical Carcinoma (TCGA, PanCancer Atlas)	1
TCGA-OR-A5KW	Adrenocortical Carcinoma (TCGA, PanCancer Atlas)	1
TCGA-OR-A5KX	Adrenocortical Carcinoma (TCGA, PanCancer Atlas)	1
TCGA-OR-A5KY	Adrenocortical Carcinoma (TCGA, PanCancer Atlas)	1
TCGA-OR-A5KZ	Adrenocortical Carcinoma (TCGA, PanCancer Atlas)	1
TCGA-OR-A5L1	Adrenocortical Carcinoma (TCGA, PanCancer Atlas)	1
TCGA-OR-A5L2	Adrenocortical Carcinoma (TCGA, PanCancer Atlas)	1
TCGA-OR-A5L3	Adrenocortical Carcinoma (TCGA, PanCancer Atlas)	1
TCGA-OR-A5L4	Adrenocortical Carcinoma (TCGA, PanCancer Atlas)	1
TCGA-OR-A5L5	Adrenocortical Carcinoma (TCGA, PanCancer Atlas)	1
TCGA-OR-A5L6	Adrenocortical Carcinoma (TCGA, PanCancer Atlas)	1
TCGA-OR-A5L8	Adrenocortical Carcinoma (TCGA, PanCancer Atlas)	1
TCGA-OR-A5L9	Adrenocortical Carcinoma (TCGA, PanCancer Atlas)	1
TCGA-OR-A5LA	Adrenocortical Carcinoma (TCGA, PanCancer Atlas)	1
TCGA-OR-A5LB	Adrenocortical Carcinoma (TCGA, PanCancer Atlas)	1
TCGA-OR-A5LC	Adrenocortical Carcinoma (TCGA, PanCancer Atlas)	1
TCGA-OR-A5LD	Adrenocortical Carcinoma (TCGA, PanCancer Atlas)	1
TCGA-OR-A5LE	Adrenocortical Carcinoma (TCGA, PanCancer Atlas)	1
TCGA-OR-A5LF	Adrenocortical Carcinoma (TCGA, PanCancer Atlas)	1
TCGA-OR-A5LG	Adrenocortical Carcinoma (TCGA, PanCancer Atlas)	1
TCGA-OR-A5LH	Adrenocortical Carcinoma (TCGA, PanCancer Atlas)	1
TCGA-OR-A5LI	Adrenocortical Carcinoma (TCGA, PanCancer Atlas)	1
TCGA-OR-A5LJ	Adrenocortical Carcinoma (TCGA, PanCancer Atlas)	1
TCGA-OR-A5LK	Adrenocortical Carcinoma (TCGA, PanCancer Atlas)	1
TCGA-OR-A5LL	Adrenocortical Carcinoma (TCGA, PanCancer Atlas)	1
TCGA-OR-A5LM	Adrenocortical Carcinoma (TCGA, PanCancer Atlas)	1
TCGA-OR-A5LN	Adrenocortical Carcinoma (TCGA, PanCancer Atlas)	1
TCGA-OR-A5LO	Adrenocortical Carcinoma (TCGA, PanCancer Atlas)	1
TCGA-OR-A5LP	Adrenocortical Carcinoma (TCGA, PanCancer Atlas)	1
TCGA-OR-A5LR	Adrenocortical Carcinoma (TCGA, PanCancer Atlas)	1
TCGA-OR-A5LS	Adrenocortical Carcinoma (TCGA, PanCancer Atlas)	1
TCGA-OR-A5LT	Adrenocortical Carcinoma (TCGA, PanCancer Atlas)	1
TCGA-OU-A5PI	Adrenocortical Carcinoma (TCGA, PanCancer Atlas)	1
TCGA-P6-A5OH	Adrenocortical Carcinoma (TCGA, PanCancer Atlas)	1
TCGA-PA-A5YG	Adrenocortical Carcinoma (TCGA, PanCancer Atlas)	1
TCGA-PK-A5H9	Adrenocortical Carcinoma (TCGA, PanCancer Atlas)	1
TCGA-PK-A5HA	Adrenocortical Carcinoma (TCGA, PanCancer Atlas)	1
TCGA-PK-A5HB	Adrenocortical Carcinoma (TCGA, PanCancer Atlas)	1
TCGA-PK-A5HC	Adrenocortical Carcinoma (TCGA, PanCancer Atlas)	1
TCGA-OR-A5OG	Adrenocortical Carcinoma (TCGA, PanCancer Atlas)	1
TCGA-P6-A5OF	Adrenocortical Carcinoma (TCGA, PanCancer Atlas)	1
TCGA-PK-A5H8	Adrenocortical Carcinoma (TCGA, PanCancer Atlas)	1
TCGA-4Z-AA84	Bladder Urothelial Carcinoma (TCGA, PanCancer Atlas)	1	Deep Deletion
TCGA-C4-A0F0	Bladder Urothelial Carcinoma (TCGA, PanCancer Atlas)	1	Deep Deletion
TCGA-DK-A1A7	Bladder Urothelial Carcinoma (TCGA, PanCancer Atlas)	1	Deep Deletion
TCGA-DK-A2I4	Bladder Urothelial Carcinoma (TCGA, PanCancer Atlas)	1	Deep Deletion
TCGA-DK-AA6U	Bladder Urothelial Carcinoma (TCGA, PanCancer Atlas)	1	Deep Deletion
TCGA-E7-A85H	Bladder Urothelial Carcinoma (TCGA, PanCancer Atlas)	1	Deep Deletion
TCGA-FD-A3B6	Bladder Urothelial Carcinoma (TCGA, PanCancer Atlas)	1	Deep Deletion
TCGA-FD-A5BX	Bladder Urothelial Carcinoma (TCGA, PanCancer Atlas)	1	Deep Deletion
TCGA-FD-A6TH	Bladder Urothelial Carcinoma (TCGA, PanCancer Atlas)	1	Deep Deletion
TCGA-FD-A62S	Bladder Urothelial Carcinoma (TCGA, PanCancer Atlas)	1	Deep Deletion
TCGA-G2-A3VY	Bladder Urothelial Carcinoma (TCGA, PanCancer Atlas)	1	Deep Deletion
TCGA-GV-A6ZA	Bladder Urothelial Carcinoma (TCGA, PanCancer Atlas)	1	Deep Deletion
TCGA-H4-A2HQ	Bladder Urothelial Carcinoma (TCGA, PanCancer Atlas)	1	Deep Deletion
TCGA-HQ-A5NE	Bladder Urothelial Carcinoma (TCGA, PanCancer Atlas)	1	Deep Deletion
TCGA-K4-A83P	Bladder Urothelial Carcinoma (TCGA, PanCancer Atlas)	1	Deep Deletion
TCGA-KQ-A41P	Bladder Urothelial Carcinoma (TCGA, PanCancer Atlas)	1	Deep Deletion
TCGA-UY-A9PF	Bladder Urothelial Carcinoma (TCGA, PanCancer Atlas)	1	Deep Deletion
TCGA-UY-A78O	Bladder Urothelial Carcinoma (TCGA, PanCancer Atlas)	1	Deep Deletion
TCGA-XF-A9SG	Bladder Urothelial Carcinoma (TCGA, PanCancer Atlas)	1	Deep Deletion
TCGA-XF-A9SJ	Bladder Urothelial Carcinoma (TCGA, PanCancer Atlas)	1	Deep Deletion
TCGA-XF-A9SP	Bladder Urothelial Carcinoma (TCGA, PanCancer Atlas)	1	Deep Deletion
TCGA-ZF-A9R0	Bladder Urothelial Carcinoma (TCGA, PanCancer Atlas)	1	Deep Deletion
TCGA-ZF-AA53	Bladder Urothelial Carcinoma (TCGA, PanCancer Atlas)	1	Deep Deletion
TCGA-ZF-AA58	Bladder Urothelial Carcinoma (TCGA, PanCancer Atlas)	1	Deep Deletion
TCGA-2F-A9KO	Bladder Urothelial Carcinoma (TCGA, PanCancer Atlas)	1
TCGA-2F-A9KP	Bladder Urothelial Carcinoma (TCGA, PanCancer Atlas)	1
TCGA-2F-A9KQ	Bladder Urothelial Carcinoma (TCGA, PanCancer Atlas)	1
TCGA-2F-A9KR	Bladder Urothelial Carcinoma (TCGA, PanCancer Atlas)	1
TCGA-2F-A9KT	Bladder Urothelial Carcinoma (TCGA, PanCancer Atlas)	1
TCGA-2F-A9KW	Bladder Urothelial Carcinoma (TCGA, PanCancer Atlas)	1
TCGA-4Z-AA7M	Bladder Urothelial Carcinoma (TCGA, PanCancer Atlas)	1
TCGA-4Z-AA7N	Bladder Urothelial Carcinoma (TCGA, PanCancer Atlas)	1
TCGA-4Z-AA7O	Bladder Urothelial Carcinoma (TCGA, PanCancer Atlas)	1
TCGA-4Z-AA7Q	Bladder Urothelial Carcinoma (TCGA, PanCancer Atlas)	1
TCGA-4Z-AA7R	Bladder Urothelial Carcinoma (TCGA, PanCancer Atlas)	1
TCGA-4Z-AA7S	Bladder Urothelial Carcinoma (TCGA, PanCancer Atlas)	1
TCGA-4Z-AA7W	Bladder Urothelial Carcinoma (TCGA, PanCancer Atlas)	1
TCGA-4Z-AA7Y	Bladder Urothelial Carcinoma (TCGA, PanCancer Atlas)	1
TCGA-4Z-AA80	Bladder Urothelial Carcinoma (TCGA, PanCancer Atlas)	1
TCGA-4Z-AA81	Bladder Urothelial Carcinoma (TCGA, PanCancer Atlas)	1
TCGA-4Z-AA82	Bladder Urothelial Carcinoma (TCGA, PanCancer Atlas)	1
TCGA-4Z-AA83	Bladder Urothelial Carcinoma (TCGA, PanCancer Atlas)	1
TCGA-4Z-AA86	Bladder Urothelial Carcinoma (TCGA, PanCancer Atlas)	1
TCGA-4Z-AA87	Bladder Urothelial Carcinoma (TCGA, PanCancer Atlas)	1
TCGA-4Z-AA89	Bladder Urothelial Carcinoma (TCGA, PanCancer Atlas)	1
TCGA-5N-A9KI	Bladder Urothelial Carcinoma (TCGA, PanCancer Atlas)	1
TCGA-5N-A9KM	Bladder Urothelial Carcinoma (TCGA, PanCancer Atlas)	1
TCGA-BL-A0C8	Bladder Urothelial Carcinoma (TCGA, PanCancer Atlas)	1
TCGA-BL-A3JM	Bladder Urothelial Carcinoma (TCGA, PanCancer Atlas)	1
TCGA-BL-A5ZZ	Bladder Urothelial Carcinoma (TCGA, PanCancer Atlas)	1
TCGA-BL-A13I	Bladder Urothelial Carcinoma (TCGA, PanCancer Atlas)	1
TCGA-BL-A13J	Bladder Urothelial Carcinoma (TCGA, PanCancer Atlas)	1
TCGA-BT-A0S7	Bladder Urothelial Carcinoma (TCGA, PanCancer Atlas)	1
TCGA-BT-A0YX	Bladder Urothelial Carcinoma (TCGA, PanCancer Atlas)	1
TCGA-BT-A2LA	Bladder Urothelial Carcinoma (TCGA, PanCancer Atlas)	1
TCGA-BT-A2LB	Bladder Urothelial Carcinoma (TCGA, PanCancer Atlas)	1
TCGA-BT-A2LD	Bladder Urothelial Carcinoma (TCGA, PanCancer Atlas)	1
TCGA-BT-A3PH	Bladder Urothelial Carcinoma (TCGA, PanCancer Atlas)	1
TCGA-BT-A3PJ	Bladder Urothelial Carcinoma (TCGA, PanCancer Atlas)	1
TCGA-BT-A3PK	Bladder Urothelial Carcinoma (TCGA, PanCancer Atlas)	1
TCGA-BT-A20J	Bladder Urothelial Carcinoma (TCGA, PanCancer Atlas)	1
TCGA-BT-A20N	Bladder Urothelial Carcinoma (TCGA, PanCancer Atlas)	1
TCGA-BT-A20O	Bladder Urothelial Carcinoma (TCGA, PanCancer Atlas)	1
TCGA-BT-A20P	Bladder Urothelial Carcinoma (TCGA, PanCancer Atlas)	1
TCGA-BT-A20Q	Bladder Urothelial Carcinoma (TCGA, PanCancer Atlas)	1
TCGA-BT-A20R	Bladder Urothelial Carcinoma (TCGA, PanCancer Atlas)	1
TCGA-BT-A20T	Bladder Urothelial Carcinoma (TCGA, PanCancer Atlas)	1
TCGA-BT-A20U	Bladder Urothelial Carcinoma (TCGA, PanCancer Atlas)	1
TCGA-BT-A20V	Bladder Urothelial Carcinoma (TCGA, PanCancer Atlas)	1
TCGA-BT-A20W	Bladder Urothelial Carcinoma (TCGA, PanCancer Atlas)	1
TCGA-BT-A20X	Bladder Urothelial Carcinoma (TCGA, PanCancer Atlas)	1
TCGA-BT-A42B	Bladder Urothelial Carcinoma (TCGA, PanCancer Atlas)	1
TCGA-BT-A42C	Bladder Urothelial Carcinoma (TCGA, PanCancer Atlas)	1
TCGA-BT-A42E	Bladder Urothelial Carcinoma (TCGA, PanCancer Atlas)	1
TCGA-BT-A42F	Bladder Urothelial Carcinoma (TCGA, PanCancer Atlas)	1
TCGA-C4-A0EZ	Bladder Urothelial Carcinoma (TCGA, PanCancer Atlas)	1
TCGA-C4-A0F6	Bladder Urothelial Carcinoma (TCGA, PanCancer Atlas)	1
TCGA-CF-A1HR	Bladder Urothelial Carcinoma (TCGA, PanCancer Atlas)	1
TCGA-CF-A1HS	Bladder Urothelial Carcinoma (TCGA, PanCancer Atlas)	1
TCGA-CF-A3MF	Bladder Urothelial Carcinoma (TCGA, PanCancer Atlas)	1
TCGA-CF-A3MG	Bladder Urothelial Carcinoma (TCGA, PanCancer Atlas)	1
TCGA-CF-A3MH	Bladder Urothelial Carcinoma (TCGA, PanCancer Atlas)	1
TCGA-CF-A3MI	Bladder Urothelial Carcinoma (TCGA, PanCancer Atlas)	1
TCGA-CF-A5U8	Bladder Urothelial Carcinoma (TCGA, PanCancer Atlas)	1
TCGA-CF-A5UA	Bladder Urothelial Carcinoma (TCGA, PanCancer Atlas)	1
TCGA-CF-A7I0	Bladder Urothelial Carcinoma (TCGA, PanCancer Atlas)	1
TCGA-CF-A8HX	Bladder Urothelial Carcinoma (TCGA, PanCancer Atlas)	1
TCGA-CF-A8HY	Bladder Urothelial Carcinoma (TCGA, PanCancer Atlas)	1
TCGA-CF-A9FF	Bladder Urothelial Carcinoma (TCGA, PanCancer Atlas)	1
TCGA-CF-A9FH	Bladder Urothelial Carcinoma (TCGA, PanCancer Atlas)	1
TCGA-CF-A9FL	Bladder Urothelial Carcinoma (TCGA, PanCancer Atlas)	1
TCGA-CF-A9FM	Bladder Urothelial Carcinoma (TCGA, PanCancer Atlas)	1
TCGA-CF-A27C	Bladder Urothelial Carcinoma (TCGA, PanCancer Atlas)	1
TCGA-CF-A47S	Bladder Urothelial Carcinoma (TCGA, PanCancer Atlas)	1
TCGA-CF-A47T	Bladder Urothelial Carcinoma (TCGA, PanCancer Atlas)	1
TCGA-CF-A47V	Bladder Urothelial Carcinoma (TCGA, PanCancer Atlas)	1
TCGA-CF-A47W	Bladder Urothelial Carcinoma (TCGA, PanCancer Atlas)	1
TCGA-CF-A47X	Bladder Urothelial Carcinoma (TCGA, PanCancer Atlas)	1
TCGA-CF-A47Y	Bladder Urothelial Carcinoma (TCGA, PanCancer Atlas)	1
TCGA-CU-A0YN	Bladder Urothelial Carcinoma (TCGA, PanCancer Atlas)	1
TCGA-CU-A0YO	Bladder Urothelial Carcinoma (TCGA, PanCancer Atlas)	1
TCGA-CU-A0YR	Bladder Urothelial Carcinoma (TCGA, PanCancer Atlas)	1
TCGA-CU-A3KJ	Bladder Urothelial Carcinoma (TCGA, PanCancer Atlas)	1
TCGA-CU-A3QU	Bladder Urothelial Carcinoma (TCGA, PanCancer Atlas)	1
TCGA-CU-A3YL	Bladder Urothelial Carcinoma (TCGA, PanCancer Atlas)	1
TCGA-CU-A5W6	Bladder Urothelial Carcinoma (TCGA, PanCancer Atlas)	1
TCGA-CU-A72E	Bladder Urothelial Carcinoma (TCGA, PanCancer Atlas)	1
TCGA-DK-A1A3	Bladder Urothelial Carcinoma (TCGA, PanCancer Atlas)	1
TCGA-DK-A1A5	Bladder Urothelial Carcinoma (TCGA, PanCancer Atlas)	1
TCGA-DK-A1A6	Bladder Urothelial Carcinoma (TCGA, PanCancer Atlas)	1
TCGA-DK-A1AA	Bladder Urothelial Carcinoma (TCGA, PanCancer Atlas)	1
TCGA-DK-A1AB	Bladder Urothelial Carcinoma (TCGA, PanCancer Atlas)	1
TCGA-DK-A1AC	Bladder Urothelial Carcinoma (TCGA, PanCancer Atlas)	1
TCGA-DK-A1AD	Bladder Urothelial Carcinoma (TCGA, PanCancer Atlas)	1
TCGA-DK-A1AE	Bladder Urothelial Carcinoma (TCGA, PanCancer Atlas)	1
TCGA-DK-A1AF	Bladder Urothelial Carcinoma (TCGA, PanCancer Atlas)	1
TCGA-DK-A1AG	Bladder Urothelial Carcinoma (TCGA, PanCancer Atlas)	1
TCGA-DK-A2HX	Bladder Urothelial Carcinoma (TCGA, PanCancer Atlas)	1
TCGA-DK-A2I1	Bladder Urothelial Carcinoma (TCGA, PanCancer Atlas)	1
TCGA-DK-A2I2	Bladder Urothelial Carcinoma (TCGA, PanCancer Atlas)	1
TCGA-DK-A2I6	Bladder Urothelial Carcinoma (TCGA, PanCancer Atlas)	1
TCGA-DK-A3IK	Bladder Urothelial Carcinoma (TCGA, PanCancer Atlas)	1
TCGA-DK-A3IL	Bladder Urothelial Carcinoma (TCGA, PanCancer Atlas)	1
TCGA-DK-A3IM	Bladder Urothelial Carcinoma (TCGA, PanCancer Atlas)	1
TCGA-DK-A3IN	Bladder Urothelial Carcinoma (TCGA, PanCancer Atlas)	1
TCGA-DK-A3IQ	Bladder Urothelial Carcinoma (TCGA, PanCancer Atlas)	1
TCGA-DK-A3IS	Bladder Urothelial Carcinoma (TCGA, PanCancer Atlas)	1
TCGA-DK-A3IT	Bladder Urothelial Carcinoma (TCGA, PanCancer Atlas)	1
TCGA-DK-A3IU	Bladder Urothelial Carcinoma (TCGA, PanCancer Atlas)	1
TCGA-DK-A3IV	Bladder Urothelial Carcinoma (TCGA, PanCancer Atlas)	1
TCGA-DK-A3WW	Bladder Urothelial Carcinoma (TCGA, PanCancer Atlas)	1
TCGA-DK-A3WX	Bladder Urothelial Carcinoma (TCGA, PanCancer Atlas)	1
TCGA-DK-A3WY	Bladder Urothelial Carcinoma (TCGA, PanCancer Atlas)	1
TCGA-DK-A3X1	Bladder Urothelial Carcinoma (TCGA, PanCancer Atlas)	1
TCGA-DK-A3X2	Bladder Urothelial Carcinoma (TCGA, PanCancer Atlas)	1
TCGA-DK-A6AV	Bladder Urothelial Carcinoma (TCGA, PanCancer Atlas)	1
TCGA-DK-A6AW	Bladder Urothelial Carcinoma (TCGA, PanCancer Atlas)	1
TCGA-DK-A6B0	Bladder Urothelial Carcinoma (TCGA, PanCancer Atlas)	1
TCGA-DK-A6B1	Bladder Urothelial Carcinoma (TCGA, PanCancer Atlas)	1
TCGA-DK-A6B2	Bladder Urothelial Carcinoma (TCGA, PanCancer Atlas)	1
TCGA-DK-A6B5	Bladder Urothelial Carcinoma (TCGA, PanCancer Atlas)	1
TCGA-DK-A6B6	Bladder Urothelial Carcinoma (TCGA, PanCancer Atlas)	1
TCGA-DK-AA6L	Bladder Urothelial Carcinoma (TCGA, PanCancer Atlas)	1
TCGA-DK-AA6M	Bladder Urothelial Carcinoma (TCGA, PanCancer Atlas)	1
TCGA-DK-AA6P	Bladder Urothelial Carcinoma (TCGA, PanCancer Atlas)	1
TCGA-DK-AA6Q	Bladder Urothelial Carcinoma (TCGA, PanCancer Atlas)	1
TCGA-DK-AA6R	Bladder Urothelial Carcinoma (TCGA, PanCancer Atlas)	1
TCGA-DK-AA6S	Bladder Urothelial Carcinoma (TCGA, PanCancer Atlas)	1
TCGA-DK-AA6T	Bladder Urothelial Carcinoma (TCGA, PanCancer Atlas)	1
TCGA-DK-AA6W	Bladder Urothelial Carcinoma (TCGA, PanCancer Atlas)	1
TCGA-DK-AA6X	Bladder Urothelial Carcinoma (TCGA, PanCancer Atlas)	1
TCGA-DK-AA71	Bladder Urothelial Carcinoma (TCGA, PanCancer Atlas)	1
TCGA-DK-AA74	Bladder Urothelial Carcinoma (TCGA, PanCancer Atlas)	1
TCGA-DK-AA75	Bladder Urothelial Carcinoma (TCGA, PanCancer Atlas)	1
TCGA-DK-AA76	Bladder Urothelial Carcinoma (TCGA, PanCancer Atlas)	1
TCGA-DK-AA77	Bladder Urothelial Carcinoma (TCGA, PanCancer Atlas)	1
TCGA-E5-A2PC	Bladder Urothelial Carcinoma (TCGA, PanCancer Atlas)	1
TCGA-E5-A4TZ	Bladder Urothelial Carcinoma (TCGA, PanCancer Atlas)	1
TCGA-E5-A4U1	Bladder Urothelial Carcinoma (TCGA, PanCancer Atlas)	1
TCGA-E7-A3X6	Bladder Urothelial Carcinoma (TCGA, PanCancer Atlas)	1
TCGA-E7-A3Y1	Bladder Urothelial Carcinoma (TCGA, PanCancer Atlas)	1
TCGA-E7-A4IJ	Bladder Urothelial Carcinoma (TCGA, PanCancer Atlas)	1
TCGA-E7-A4XJ	Bladder Urothelial Carcinoma (TCGA, PanCancer Atlas)	1
TCGA-E7-A5KE	Bladder Urothelial Carcinoma (TCGA, PanCancer Atlas)	1
TCGA-E7-A5KF	Bladder Urothelial Carcinoma (TCGA, PanCancer Atlas)	1
TCGA-E7-A6MD	Bladder Urothelial Carcinoma (TCGA, PanCancer Atlas)	1
TCGA-E7-A6ME	Bladder Urothelial Carcinoma (TCGA, PanCancer Atlas)	1
TCGA-E7-A6MF	Bladder Urothelial Carcinoma (TCGA, PanCancer Atlas)	1
TCGA-E7-A7DU	Bladder Urothelial Carcinoma (TCGA, PanCancer Atlas)	1
TCGA-E7-A7DV	Bladder Urothelial Carcinoma (TCGA, PanCancer Atlas)	1
TCGA-E7-A7PW	Bladder Urothelial Carcinoma (TCGA, PanCancer Atlas)	1
TCGA-E7-A7XN	Bladder Urothelial Carcinoma (TCGA, PanCancer Atlas)	1
TCGA-E7-A8O7	Bladder Urothelial Carcinoma (TCGA, PanCancer Atlas)	1
TCGA-E7-A97P	Bladder Urothelial Carcinoma (TCGA, PanCancer Atlas)	1
TCGA-E7-A97Q	Bladder Urothelial Carcinoma (TCGA, PanCancer Atlas)	1
TCGA-E7-A519	Bladder Urothelial Carcinoma (TCGA, PanCancer Atlas)	1
TCGA-E7-A541	Bladder Urothelial Carcinoma (TCGA, PanCancer Atlas)	1
TCGA-E7-A677	Bladder Urothelial Carcinoma (TCGA, PanCancer Atlas)	1
TCGA-E7-A678	Bladder Urothelial Carcinoma (TCGA, PanCancer Atlas)	1
TCGA-FD-A3B3	Bladder Urothelial Carcinoma (TCGA, PanCancer Atlas)	1
TCGA-FD-A3B4	Bladder Urothelial Carcinoma (TCGA, PanCancer Atlas)	1
TCGA-FD-A3B5	Bladder Urothelial Carcinoma (TCGA, PanCancer Atlas)	1
TCGA-FD-A3B7	Bladder Urothelial Carcinoma (TCGA, PanCancer Atlas)	1
TCGA-FD-A3B8	Bladder Urothelial Carcinoma (TCGA, PanCancer Atlas)	1
TCGA-FD-A3N5	Bladder Urothelial Carcinoma (TCGA, PanCancer Atlas)	1
TCGA-FD-A3N6	Bladder Urothelial Carcinoma (TCGA, PanCancer Atlas)	1
TCGA-FD-A3NA	Bladder Urothelial Carcinoma (TCGA, PanCancer Atlas)	1
TCGA-FD-A3SJ	Bladder Urothelial Carcinoma (TCGA, PanCancer Atlas)	1
TCGA-FD-A3SL	Bladder Urothelial Carcinoma (TCGA, PanCancer Atlas)	1
TCGA-FD-A3SM	Bladder Urothelial Carcinoma (TCGA, PanCancer Atlas)	1
TCGA-FD-A3SN	Bladder Urothelial Carcinoma (TCGA, PanCancer Atlas)	1
TCGA-FD-A3SO	Bladder Urothelial Carcinoma (TCGA, PanCancer Atlas)	1
TCGA-FD-A3SP	Bladder Urothelial Carcinoma (TCGA, PanCancer Atlas)	1
TCGA-FD-A3SQ	Bladder Urothelial Carcinoma (TCGA, PanCancer Atlas)	1
TCGA-FD-A3SR	Bladder Urothelial Carcinoma (TCGA, PanCancer Atlas)	1
TCGA-FD-A3SS	Bladder Urothelial Carcinoma (TCGA, PanCancer Atlas)	1
TCGA-FD-A5BR	Bladder Urothelial Carcinoma (TCGA, PanCancer Atlas)	1
TCGA-FD-A5BS	Bladder Urothelial Carcinoma (TCGA, PanCancer Atlas)	1
TCGA-FD-A5BT	Bladder Urothelial Carcinoma (TCGA, PanCancer Atlas)	1
TCGA-FD-A5BU	Bladder Urothelial Carcinoma (TCGA, PanCancer Atlas)	1
TCGA-FD-A5BV	Bladder Urothelial Carcinoma (TCGA, PanCancer Atlas)	1
TCGA-FD-A5BY	Bladder Urothelial Carcinoma (TCGA, PanCancer Atlas)	1
TCGA-FD-A5BZ	Bladder Urothelial Carcinoma (TCGA, PanCancer Atlas)	1
TCGA-FD-A5C0	Bladder Urothelial Carcinoma (TCGA, PanCancer Atlas)	1
TCGA-FD-A5C1	Bladder Urothelial Carcinoma (TCGA, PanCancer Atlas)	1
TCGA-FD-A6TA	Bladder Urothelial Carcinoma (TCGA, PanCancer Atlas)	1
TCGA-FD-A6TB	Bladder Urothelial Carcinoma (TCGA, PanCancer Atlas)	1
TCGA-FD-A6TC	Bladder Urothelial Carcinoma (TCGA, PanCancer Atlas)	1
TCGA-FD-A6TD	Bladder Urothelial Carcinoma (TCGA, PanCancer Atlas)	1
TCGA-FD-A6TE	Bladder Urothelial Carcinoma (TCGA, PanCancer Atlas)	1
TCGA-FD-A6TF	Bladder Urothelial Carcinoma (TCGA, PanCancer Atlas)	1
TCGA-FD-A6TG	Bladder Urothelial Carcinoma (TCGA, PanCancer Atlas)	1
TCGA-FD-A6TI	Bladder Urothelial Carcinoma (TCGA, PanCancer Atlas)	1
TCGA-FD-A6TK	Bladder Urothelial Carcinoma (TCGA, PanCancer Atlas)	1
TCGA-FD-A43N	Bladder Urothelial Carcinoma (TCGA, PanCancer Atlas)	1
TCGA-FD-A43P	Bladder Urothelial Carcinoma (TCGA, PanCancer Atlas)	1
TCGA-FD-A43S	Bladder Urothelial Carcinoma (TCGA, PanCancer Atlas)	1
TCGA-FD-A43U	Bladder Urothelial Carcinoma (TCGA, PanCancer Atlas)	1
TCGA-FD-A43X	Bladder Urothelial Carcinoma (TCGA, PanCancer Atlas)	1
TCGA-FD-A43Y	Bladder Urothelial Carcinoma (TCGA, PanCancer Atlas)	1
TCGA-FD-A62N	Bladder Urothelial Carcinoma (TCGA, PanCancer Atlas)	1
TCGA-FD-A62O	Bladder Urothelial Carcinoma (TCGA, PanCancer Atlas)	1
TCGA-FD-A62P	Bladder Urothelial Carcinoma (TCGA, PanCancer Atlas)	1
TCGA-FJ-A3Z7	Bladder Urothelial Carcinoma (TCGA, PanCancer Atlas)	1
TCGA-FJ-A3Z9	Bladder Urothelial Carcinoma (TCGA, PanCancer Atlas)	1
TCGA-FJ-A3ZE	Bladder Urothelial Carcinoma (TCGA, PanCancer Atlas)	1
TCGA-FJ-A3ZF	Bladder Urothelial Carcinoma (TCGA, PanCancer Atlas)	1
TCGA-FJ-A871	Bladder Urothelial Carcinoma (TCGA, PanCancer Atlas)	1
TCGA-FT-A3EE	Bladder Urothelial Carcinoma (TCGA, PanCancer Atlas)	1
TCGA-FT-A61P	Bladder Urothelial Carcinoma (TCGA, PanCancer Atlas)	1
TCGA-G2-A2EF	Bladder Urothelial Carcinoma (TCGA, PanCancer Atlas)	1
TCGA-G2-A2EJ	Bladder Urothelial Carcinoma (TCGA, PanCancer Atlas)	1
TCGA-G2-A2EK	Bladder Urothelial Carcinoma (TCGA, PanCancer Atlas)	1
TCGA-G2-A2EL	Bladder Urothelial Carcinoma (TCGA, PanCancer Atlas)	1
TCGA-G2-A2EO	Bladder Urothelial Carcinoma (TCGA, PanCancer Atlas)	1
TCGA-G2-A2ES	Bladder Urothelial Carcinoma (TCGA, PanCancer Atlas)	1
TCGA-G2-A3IB	Bladder Urothelial Carcinoma (TCGA, PanCancer Atlas)	1
TCGA-G2-A3IE	Bladder Urothelial Carcinoma (TCGA, PanCancer Atlas)	1
TCGA-G2-AA3B	Bladder Urothelial Carcinoma (TCGA, PanCancer Atlas)	1
TCGA-G2-AA3C	Bladder Urothelial Carcinoma (TCGA, PanCancer Atlas)	1
TCGA-G2-AA3D	Bladder Urothelial Carcinoma (TCGA, PanCancer Atlas)	1
TCGA-G2-AA3F	Bladder Urothelial Carcinoma (TCGA, PanCancer Atlas)	1
TCGA-GC-A3BM	Bladder Urothelial Carcinoma (TCGA, PanCancer Atlas)	1
TCGA-GC-A3I6	Bladder Urothelial Carcinoma (TCGA, PanCancer Atlas)	1
TCGA-GC-A3OO	Bladder Urothelial Carcinoma (TCGA, PanCancer Atlas)	1
TCGA-GC-A3RB	Bladder Urothelial Carcinoma (TCGA, PanCancer Atlas)	1
TCGA-GC-A3RC	Bladder Urothelial Carcinoma (TCGA, PanCancer Atlas)	1
TCGA-GC-A3RD	Bladder Urothelial Carcinoma (TCGA, PanCancer Atlas)	1
TCGA-GC-A3WC	Bladder Urothelial Carcinoma (TCGA, PanCancer Atlas)	1
TCGA-GC-A3YS	Bladder Urothelial Carcinoma (TCGA, PanCancer Atlas)	1
TCGA-GC-A4ZW	Bladder Urothelial Carcinoma (TCGA, PanCancer Atlas)	1
TCGA-GC-A6I1	Bladder Urothelial Carcinoma (TCGA, PanCancer Atlas)	1
TCGA-GC-A6I3	Bladder Urothelial Carcinoma (TCGA, PanCancer Atlas)	1
TCGA-GD-A2C5	Bladder Urothelial Carcinoma (TCGA, PanCancer Atlas)	1
TCGA-GD-A3OP	Bladder Urothelial Carcinoma (TCGA, PanCancer Atlas)	1
TCGA-GD-A3OQ	Bladder Urothelial Carcinoma (TCGA, PanCancer Atlas)	1
TCGA-GD-A3OS	Bladder Urothelial Carcinoma (TCGA, PanCancer Atlas)	1
TCGA-GD-A6C6	Bladder Urothelial Carcinoma (TCGA, PanCancer Atlas)	1
TCGA-GD-A76B	Bladder Urothelial Carcinoma (TCGA, PanCancer Atlas)	1
TCGA-GU-A42P	Bladder Urothelial Carcinoma (TCGA, PanCancer Atlas)	1
TCGA-GU-A42Q	Bladder Urothelial Carcinoma (TCGA, PanCancer Atlas)	1
TCGA-GU-A42R	Bladder Urothelial Carcinoma (TCGA, PanCancer Atlas)	1
TCGA-GU-AATO	Bladder Urothelial Carcinoma (TCGA, PanCancer Atlas)	1
TCGA-GU-AATP	Bladder Urothelial Carcinoma (TCGA, PanCancer Atlas)	1
TCGA-GU-AATQ	Bladder Urothelial Carcinoma (TCGA, PanCancer Atlas)	1
TCGA-GU-A762	Bladder Urothelial Carcinoma (TCGA, PanCancer Atlas)	1
TCGA-GU-A763	Bladder Urothelial Carcinoma (TCGA, PanCancer Atlas)	1
TCGA-GU-A764	Bladder Urothelial Carcinoma (TCGA, PanCancer Atlas)	1
TCGA-GU-A766	Bladder Urothelial Carcinoma (TCGA, PanCancer Atlas)	1
TCGA-GU-A767	Bladder Urothelial Carcinoma (TCGA, PanCancer Atlas)	1
TCGA-GV-A3JV	Bladder Urothelial Carcinoma (TCGA, PanCancer Atlas)	1
TCGA-GV-A3JW	Bladder Urothelial Carcinoma (TCGA, PanCancer Atlas)	1
TCGA-GV-A3JX	Bladder Urothelial Carcinoma (TCGA, PanCancer Atlas)	1
TCGA-GV-A3JZ	Bladder Urothelial Carcinoma (TCGA, PanCancer Atlas)	1
TCGA-GV-A3QF	Bladder Urothelial Carcinoma (TCGA, PanCancer Atlas)	1
TCGA-GV-A3QG	Bladder Urothelial Carcinoma (TCGA, PanCancer Atlas)	1
TCGA-GV-A3QH	Bladder Urothelial Carcinoma (TCGA, PanCancer Atlas)	1
TCGA-GV-A3QI	Bladder Urothelial Carcinoma (TCGA, PanCancer Atlas)	1
TCGA-GV-A3QK	Bladder Urothelial Carcinoma (TCGA, PanCancer Atlas)	1
TCGA-GV-A40E	Bladder Urothelial Carcinoma (TCGA, PanCancer Atlas)	1
TCGA-GV-A40G	Bladder Urothelial Carcinoma (TCGA, PanCancer Atlas)	1
TCGA-H4-A2HO	Bladder Urothelial Carcinoma (TCGA, PanCancer Atlas)	1
TCGA-HQ-A2OE	Bladder Urothelial Carcinoma (TCGA, PanCancer Atlas)	1
TCGA-HQ-A2OF	Bladder Urothelial Carcinoma (TCGA, PanCancer Atlas)	1
TCGA-HQ-A5ND	Bladder Urothelial Carcinoma (TCGA, PanCancer Atlas)	1
TCGA-K4-A3WS	Bladder Urothelial Carcinoma (TCGA, PanCancer Atlas)	1
TCGA-K4-A3WU	Bladder Urothelial Carcinoma (TCGA, PanCancer Atlas)	1
TCGA-K4-A3WV	Bladder Urothelial Carcinoma (TCGA, PanCancer Atlas)	1
TCGA-K4-A4AB	Bladder Urothelial Carcinoma (TCGA, PanCancer Atlas)	1
TCGA-K4-A4AC	Bladder Urothelial Carcinoma (TCGA, PanCancer Atlas)	1
TCGA-K4-A5RH	Bladder Urothelial Carcinoma (TCGA, PanCancer Atlas)	1
TCGA-K4-A5RI	Bladder Urothelial Carcinoma (TCGA, PanCancer Atlas)	1
TCGA-K4-A5RJ	Bladder Urothelial Carcinoma (TCGA, PanCancer Atlas)	1
TCGA-K4-A6FZ	Bladder Urothelial Carcinoma (TCGA, PanCancer Atlas)	1
TCGA-K4-A6MB	Bladder Urothelial Carcinoma (TCGA, PanCancer Atlas)	1
TCGA-K4-A54R	Bladder Urothelial Carcinoma (TCGA, PanCancer Atlas)	1
TCGA-K4-AAQO	Bladder Urothelial Carcinoma (TCGA, PanCancer Atlas)	1
TCGA-KQ-A41N	Bladder Urothelial Carcinoma (TCGA, PanCancer Atlas)	1
TCGA-KQ-A41O	Bladder Urothelial Carcinoma (TCGA, PanCancer Atlas)	1
TCGA-KQ-A41Q	Bladder Urothelial Carcinoma (TCGA, PanCancer Atlas)	1
TCGA-KQ-A41R	Bladder Urothelial Carcinoma (TCGA, PanCancer Atlas)	1
TCGA-KQ-A41S	Bladder Urothelial Carcinoma (TCGA, PanCancer Atlas)	1
TCGA-LC-A66R	Bladder Urothelial Carcinoma (TCGA, PanCancer Atlas)	1
TCGA-LT-A5Z6	Bladder Urothelial Carcinoma (TCGA, PanCancer Atlas)	1
TCGA-LT-A8JT	Bladder Urothelial Carcinoma (TCGA, PanCancer Atlas)	1
TCGA-MV-A51V	Bladder Urothelial Carcinoma (TCGA, PanCancer Atlas)	1
TCGA-PQ-A6FI	Bladder Urothelial Carcinoma (TCGA, PanCancer Atlas)	1
TCGA-PQ-A6FN	Bladder Urothelial Carcinoma (TCGA, PanCancer Atlas)	1
TCGA-R3-A69X	Bladder Urothelial Carcinoma (TCGA, PanCancer Atlas)	1
TCGA-S5-A6DX	Bladder Urothelial Carcinoma (TCGA, PanCancer Atlas)	1
TCGA-S5-AA26	Bladder Urothelial Carcinoma (TCGA, PanCancer Atlas)	1
TCGA-SY-A9G0	Bladder Urothelial Carcinoma (TCGA, PanCancer Atlas)	1
TCGA-SY-A9G5	Bladder Urothelial Carcinoma (TCGA, PanCancer Atlas)	1
TCGA-UY-A8OB	Bladder Urothelial Carcinoma (TCGA, PanCancer Atlas)	1
TCGA-UY-A8OC	Bladder Urothelial Carcinoma (TCGA, PanCancer Atlas)	1
TCGA-UY-A8OD	Bladder Urothelial Carcinoma (TCGA, PanCancer Atlas)	1
TCGA-UY-A9PA	Bladder Urothelial Carcinoma (TCGA, PanCancer Atlas)	1
TCGA-UY-A9PB	Bladder Urothelial Carcinoma (TCGA, PanCancer Atlas)	1
TCGA-UY-A9PD	Bladder Urothelial Carcinoma (TCGA, PanCancer Atlas)	1
TCGA-UY-A9PE	Bladder Urothelial Carcinoma (TCGA, PanCancer Atlas)	1
TCGA-UY-A9PH	Bladder Urothelial Carcinoma (TCGA, PanCancer Atlas)	1
TCGA-UY-A78K	Bladder Urothelial Carcinoma (TCGA, PanCancer Atlas)	1
TCGA-UY-A78L	Bladder Urothelial Carcinoma (TCGA, PanCancer Atlas)	1
TCGA-UY-A78M	Bladder Urothelial Carcinoma (TCGA, PanCancer Atlas)	1
TCGA-UY-A78N	Bladder Urothelial Carcinoma (TCGA, PanCancer Atlas)	1
TCGA-UY-A78P	Bladder Urothelial Carcinoma (TCGA, PanCancer Atlas)	1
TCGA-XF-A8HB	Bladder Urothelial Carcinoma (TCGA, PanCancer Atlas)	1
TCGA-XF-A8HC	Bladder Urothelial Carcinoma (TCGA, PanCancer Atlas)	1
TCGA-XF-A8HD	Bladder Urothelial Carcinoma (TCGA, PanCancer Atlas)	1
TCGA-XF-A8HE	Bladder Urothelial Carcinoma (TCGA, PanCancer Atlas)	1
TCGA-XF-A8HF	Bladder Urothelial Carcinoma (TCGA, PanCancer Atlas)	1
TCGA-XF-A8HG	Bladder Urothelial Carcinoma (TCGA, PanCancer Atlas)	1
TCGA-XF-A8HH	Bladder Urothelial Carcinoma (TCGA, PanCancer Atlas)	1
TCGA-XF-A8HI	Bladder Urothelial Carcinoma (TCGA, PanCancer Atlas)	1
TCGA-XF-A9SH	Bladder Urothelial Carcinoma (TCGA, PanCancer Atlas)	1
TCGA-XF-A9SI	Bladder Urothelial Carcinoma (TCGA, PanCancer Atlas)	1
TCGA-XF-A9SK	Bladder Urothelial Carcinoma (TCGA, PanCancer Atlas)	1
TCGA-XF-A9SL	Bladder Urothelial Carcinoma (TCGA, PanCancer Atlas)	1
TCGA-XF-A9SM	Bladder Urothelial Carcinoma (TCGA, PanCancer Atlas)	1
TCGA-XF-A9ST	Bladder Urothelial Carcinoma (TCGA, PanCancer Atlas)	1
TCGA-XF-A9SU	Bladder Urothelial Carcinoma (TCGA, PanCancer Atlas)	1
TCGA-XF-A9SV	Bladder Urothelial Carcinoma (TCGA, PanCancer Atlas)	1
TCGA-XF-A9SW	Bladder Urothelial Carcinoma (TCGA, PanCancer Atlas)	1
TCGA-XF-A9SX	Bladder Urothelial Carcinoma (TCGA, PanCancer Atlas)	1
TCGA-XF-A9SY	Bladder Urothelial Carcinoma (TCGA, PanCancer Atlas)	1
TCGA-XF-A9SZ	Bladder Urothelial Carcinoma (TCGA, PanCancer Atlas)	1
TCGA-XF-A9T0	Bladder Urothelial Carcinoma (TCGA, PanCancer Atlas)	1
TCGA-XF-A9T2	Bladder Urothelial Carcinoma (TCGA, PanCancer Atlas)	1
TCGA-XF-A9T3	Bladder Urothelial Carcinoma (TCGA, PanCancer Atlas)	1
TCGA-XF-A9T4	Bladder Urothelial Carcinoma (TCGA, PanCancer Atlas)	1
TCGA-XF-A9T5	Bladder Urothelial Carcinoma (TCGA, PanCancer Atlas)	1
TCGA-XF-A9T6	Bladder Urothelial Carcinoma (TCGA, PanCancer Atlas)	1
TCGA-XF-A9T8	Bladder Urothelial Carcinoma (TCGA, PanCancer Atlas)	1
TCGA-XF-AAME	Bladder Urothelial Carcinoma (TCGA, PanCancer Atlas)	1
TCGA-XF-AAMF	Bladder Urothelial Carcinoma (TCGA, PanCancer Atlas)	1
TCGA-XF-AAMG	Bladder Urothelial Carcinoma (TCGA, PanCancer Atlas)	1
TCGA-XF-AAMH	Bladder Urothelial Carcinoma (TCGA, PanCancer Atlas)	1
TCGA-XF-AAMJ	Bladder Urothelial Carcinoma (TCGA, PanCancer Atlas)	1
TCGA-XF-AAML	Bladder Urothelial Carcinoma (TCGA, PanCancer Atlas)	1
TCGA-XF-AAMQ	Bladder Urothelial Carcinoma (TCGA, PanCancer Atlas)	1
TCGA-XF-AAMR	Bladder Urothelial Carcinoma (TCGA, PanCancer Atlas)	1
TCGA-XF-AAMT	Bladder Urothelial Carcinoma (TCGA, PanCancer Atlas)	1
TCGA-XF-AAMW	Bladder Urothelial Carcinoma (TCGA, PanCancer Atlas)	1
TCGA-XF-AAMX	Bladder Urothelial Carcinoma (TCGA, PanCancer Atlas)	1
TCGA-XF-AAMY	Bladder Urothelial Carcinoma (TCGA, PanCancer Atlas)	1
TCGA-XF-AAMZ	Bladder Urothelial Carcinoma (TCGA, PanCancer Atlas)	1
TCGA-XF-AAN0	Bladder Urothelial Carcinoma (TCGA, PanCancer Atlas)	1
TCGA-XF-AAN1	Bladder Urothelial Carcinoma (TCGA, PanCancer Atlas)	1
TCGA-XF-AAN2	Bladder Urothelial Carcinoma (TCGA, PanCancer Atlas)	1
TCGA-XF-AAN3	Bladder Urothelial Carcinoma (TCGA, PanCancer Atlas)	1
TCGA-XF-AAN4	Bladder Urothelial Carcinoma (TCGA, PanCancer Atlas)	1
TCGA-XF-AAN5	Bladder Urothelial Carcinoma (TCGA, PanCancer Atlas)	1
TCGA-XF-AAN7	Bladder Urothelial Carcinoma (TCGA, PanCancer Atlas)	1
TCGA-XF-AAN8	Bladder Urothelial Carcinoma (TCGA, PanCancer Atlas)	1
TCGA-YC-A8S6	Bladder Urothelial Carcinoma (TCGA, PanCancer Atlas)	1
TCGA-YC-A9TC	Bladder Urothelial Carcinoma (TCGA, PanCancer Atlas)	1
TCGA-YC-A89H	Bladder Urothelial Carcinoma (TCGA, PanCancer Atlas)	1
TCGA-YF-AA3L	Bladder Urothelial Carcinoma (TCGA, PanCancer Atlas)	1
TCGA-YF-AA3M	Bladder Urothelial Carcinoma (TCGA, PanCancer Atlas)	1
TCGA-ZF-A9R1	Bladder Urothelial Carcinoma (TCGA, PanCancer Atlas)	1
TCGA-ZF-A9R2	Bladder Urothelial Carcinoma (TCGA, PanCancer Atlas)	1
TCGA-ZF-A9R3	Bladder Urothelial Carcinoma (TCGA, PanCancer Atlas)	1
TCGA-ZF-A9R4	Bladder Urothelial Carcinoma (TCGA, PanCancer Atlas)	1
TCGA-ZF-A9R5	Bladder Urothelial Carcinoma (TCGA, PanCancer Atlas)	1
TCGA-ZF-A9R7	Bladder Urothelial Carcinoma (TCGA, PanCancer Atlas)	1
TCGA-ZF-A9R9	Bladder Urothelial Carcinoma (TCGA, PanCancer Atlas)	1
TCGA-ZF-A9RC	Bladder Urothelial Carcinoma (TCGA, PanCancer Atlas)	1
TCGA-ZF-A9RD	Bladder Urothelial Carcinoma (TCGA, PanCancer Atlas)	1
TCGA-ZF-A9RE	Bladder Urothelial Carcinoma (TCGA, PanCancer Atlas)	1
TCGA-ZF-A9RF	Bladder Urothelial Carcinoma (TCGA, PanCancer Atlas)	1
TCGA-ZF-A9RG	Bladder Urothelial Carcinoma (TCGA, PanCancer Atlas)	1
TCGA-ZF-A9RL	Bladder Urothelial Carcinoma (TCGA, PanCancer Atlas)	1
TCGA-ZF-A9RM	Bladder Urothelial Carcinoma (TCGA, PanCancer Atlas)	1
TCGA-ZF-A9RN	Bladder Urothelial Carcinoma (TCGA, PanCancer Atlas)	1
TCGA-ZF-AA4N	Bladder Urothelial Carcinoma (TCGA, PanCancer Atlas)	1
TCGA-ZF-AA4R	Bladder Urothelial Carcinoma (TCGA, PanCancer Atlas)	1
TCGA-ZF-AA4T	Bladder Urothelial Carcinoma (TCGA, PanCancer Atlas)	1
TCGA-ZF-AA4U	Bladder Urothelial Carcinoma (TCGA, PanCancer Atlas)	1
TCGA-ZF-AA4V	Bladder Urothelial Carcinoma (TCGA, PanCancer Atlas)	1
TCGA-ZF-AA4W	Bladder Urothelial Carcinoma (TCGA, PanCancer Atlas)	1
TCGA-ZF-AA4X	Bladder Urothelial Carcinoma (TCGA, PanCancer Atlas)	1
TCGA-ZF-AA5H	Bladder Urothelial Carcinoma (TCGA, PanCancer Atlas)	1
TCGA-ZF-AA5N	Bladder Urothelial Carcinoma (TCGA, PanCancer Atlas)	1
TCGA-ZF-AA5P	Bladder Urothelial Carcinoma (TCGA, PanCancer Atlas)	1
TCGA-ZF-AA51	Bladder Urothelial Carcinoma (TCGA, PanCancer Atlas)	1
TCGA-ZF-AA52	Bladder Urothelial Carcinoma (TCGA, PanCancer Atlas)	1
TCGA-ZF-AA54	Bladder Urothelial Carcinoma (TCGA, PanCancer Atlas)	1
TCGA-ZF-AA56	Bladder Urothelial Carcinoma (TCGA, PanCancer Atlas)	1
TCGA-C4-A0F1	Bladder Urothelial Carcinoma (TCGA, PanCancer Atlas)	1
TCGA-C4-A0F7	Bladder Urothelial Carcinoma (TCGA, PanCancer Atlas)	1
TCGA-G2-A2EC	Bladder Urothelial Carcinoma (TCGA, PanCancer Atlas)	1
TCGA-TQ-A7RR	Brain Lower Grade Glioma (TCGA, PanCancer Atlas)	1	Amplification
TCGA-DB-A64X	Brain Lower Grade Glioma (TCGA, PanCancer Atlas)	1	Deep Deletion
TCGA-CS-4938	Brain Lower Grade Glioma (TCGA, PanCancer Atlas)	1
TCGA-CS-4941	Brain Lower Grade Glioma (TCGA, PanCancer Atlas)	1
TCGA-CS-4942	Brain Lower Grade Glioma (TCGA, PanCancer Atlas)	1
TCGA-CS-4943	Brain Lower Grade Glioma (TCGA, PanCancer Atlas)	1
TCGA-CS-4944	Brain Lower Grade Glioma (TCGA, PanCancer Atlas)	1
TCGA-CS-5390	Brain Lower Grade Glioma (TCGA, PanCancer Atlas)	1
TCGA-CS-5393	Brain Lower Grade Glioma (TCGA, PanCancer Atlas)	1
TCGA-CS-5394	Brain Lower Grade Glioma (TCGA, PanCancer Atlas)	1
TCGA-CS-5395	Brain Lower Grade Glioma (TCGA, PanCancer Atlas)	1
TCGA-CS-5396	Brain Lower Grade Glioma (TCGA, PanCancer Atlas)	1
TCGA-CS-5397	Brain Lower Grade Glioma (TCGA, PanCancer Atlas)	1
TCGA-CS-6186	Brain Lower Grade Glioma (TCGA, PanCancer Atlas)	1
TCGA-CS-6188	Brain Lower Grade Glioma (TCGA, PanCancer Atlas)	1
TCGA-CS-6290	Brain Lower Grade Glioma (TCGA, PanCancer Atlas)	1
TCGA-CS-6665	Brain Lower Grade Glioma (TCGA, PanCancer Atlas)	1
TCGA-CS-6666	Brain Lower Grade Glioma (TCGA, PanCancer Atlas)	1
TCGA-CS-6667	Brain Lower Grade Glioma (TCGA, PanCancer Atlas)	1
TCGA-CS-6668	Brain Lower Grade Glioma (TCGA, PanCancer Atlas)	1
TCGA-CS-6669	Brain Lower Grade Glioma (TCGA, PanCancer Atlas)	1
TCGA-CS-6670	Brain Lower Grade Glioma (TCGA, PanCancer Atlas)	1
TCGA-DB-A4X9	Brain Lower Grade Glioma (TCGA, PanCancer Atlas)	1
TCGA-DB-A4XA	Brain Lower Grade Glioma (TCGA, PanCancer Atlas)	1
TCGA-DB-A4XB	Brain Lower Grade Glioma (TCGA, PanCancer Atlas)	1
TCGA-DB-A4XC	Brain Lower Grade Glioma (TCGA, PanCancer Atlas)	1
TCGA-DB-A4XD	Brain Lower Grade Glioma (TCGA, PanCancer Atlas)	1
TCGA-DB-A4XE	Brain Lower Grade Glioma (TCGA, PanCancer Atlas)	1
TCGA-DB-A4XF	Brain Lower Grade Glioma (TCGA, PanCancer Atlas)	1
TCGA-DB-A4XG	Brain Lower Grade Glioma (TCGA, PanCancer Atlas)	1
TCGA-DB-A4XH	Brain Lower Grade Glioma (TCGA, PanCancer Atlas)	1
TCGA-DB-A64L	Brain Lower Grade Glioma (TCGA, PanCancer Atlas)	1
TCGA-DB-A64O	Brain Lower Grade Glioma (TCGA, PanCancer Atlas)	1
TCGA-DB-A64P	Brain Lower Grade Glioma (TCGA, PanCancer Atlas)	1
TCGA-DB-A64Q	Brain Lower Grade Glioma (TCGA, PanCancer Atlas)	1
TCGA-DB-A64R	Brain Lower Grade Glioma (TCGA, PanCancer Atlas)	1
TCGA-DB-A64S	Brain Lower Grade Glioma (TCGA, PanCancer Atlas)	1
TCGA-DB-A64U	Brain Lower Grade Glioma (TCGA, PanCancer Atlas)	1
TCGA-DB-A64V	Brain Lower Grade Glioma (TCGA, PanCancer Atlas)	1
TCGA-DB-A64W	Brain Lower Grade Glioma (TCGA, PanCancer Atlas)	1
TCGA-DB-A75K	Brain Lower Grade Glioma (TCGA, PanCancer Atlas)	1
TCGA-DB-A75L	Brain Lower Grade Glioma (TCGA, PanCancer Atlas)	1
TCGA-DB-A75M	Brain Lower Grade Glioma (TCGA, PanCancer Atlas)	1
TCGA-DB-A75O	Brain Lower Grade Glioma (TCGA, PanCancer Atlas)	1
TCGA-DB-A75P	Brain Lower Grade Glioma (TCGA, PanCancer Atlas)	1
TCGA-DB-5270	Brain Lower Grade Glioma (TCGA, PanCancer Atlas)	1
TCGA-DB-5273	Brain Lower Grade Glioma (TCGA, PanCancer Atlas)	1
TCGA-DB-5274	Brain Lower Grade Glioma (TCGA, PanCancer Atlas)	1
TCGA-DB-5275	Brain Lower Grade Glioma (TCGA, PanCancer Atlas)	1
TCGA-DB-5276	Brain Lower Grade Glioma (TCGA, PanCancer Atlas)	1
TCGA-DB-5277	Brain Lower Grade Glioma (TCGA, PanCancer Atlas)	1
TCGA-DB-5278	Brain Lower Grade Glioma (TCGA, PanCancer Atlas)	1
TCGA-DB-5279	Brain Lower Grade Glioma (TCGA, PanCancer Atlas)	1
TCGA-DB-5280	Brain Lower Grade Glioma (TCGA, PanCancer Atlas)	1
TCGA-DB-5281	Brain Lower Grade Glioma (TCGA, PanCancer Atlas)	1
TCGA-DH-A7UR	Brain Lower Grade Glioma (TCGA, PanCancer Atlas)	1
TCGA-DH-A7US	Brain Lower Grade Glioma (TCGA, PanCancer Atlas)	1
TCGA-DH-A7UT	Brain Lower Grade Glioma (TCGA, PanCancer Atlas)	1
TCGA-DH-A7UU	Brain Lower Grade Glioma (TCGA, PanCancer Atlas)	1
TCGA-DH-A7UV	Brain Lower Grade Glioma (TCGA, PanCancer Atlas)	1
TCGA-DH-A66B	Brain Lower Grade Glioma (TCGA, PanCancer Atlas)	1
TCGA-DH-A66D	Brain Lower Grade Glioma (TCGA, PanCancer Atlas)	1
TCGA-DH-A66F	Brain Lower Grade Glioma (TCGA, PanCancer Atlas)	1
TCGA-DH-A66G	Brain Lower Grade Glioma (TCGA, PanCancer Atlas)	1
TCGA-DH-A669	Brain Lower Grade Glioma (TCGA, PanCancer Atlas)	1
TCGA-DH-5140	Brain Lower Grade Glioma (TCGA, PanCancer Atlas)	1
TCGA-DH-5141	Brain Lower Grade Glioma (TCGA, PanCancer Atlas)	1
TCGA-DH-5142	Brain Lower Grade Glioma (TCGA, PanCancer Atlas)	1
TCGA-DH-5143	Brain Lower Grade Glioma (TCGA, PanCancer Atlas)	1
TCGA-DH-5144	Brain Lower Grade Glioma (TCGA, PanCancer Atlas)	1
TCGA-DU-A5TP	Brain Lower Grade Glioma (TCGA, PanCancer Atlas)	1
TCGA-DU-A5TR	Brain Lower Grade Glioma (TCGA, PanCancer Atlas)	1
TCGA-DU-A5TS	Brain Lower Grade Glioma (TCGA, PanCancer Atlas)	1
TCGA-DU-A5TT	Brain Lower Grade Glioma (TCGA, PanCancer Atlas)	1
TCGA-DU-A5TU	Brain Lower Grade Glioma (TCGA, PanCancer Atlas)	1
TCGA-DU-A5TW	Brain Lower Grade Glioma (TCGA, PanCancer Atlas)	1
TCGA-DU-A5TY	Brain Lower Grade Glioma (TCGA, PanCancer Atlas)	1
TCGA-DU-A6S2	Brain Lower Grade Glioma (TCGA, PanCancer Atlas)	1
TCGA-DU-A6S3	Brain Lower Grade Glioma (TCGA, PanCancer Atlas)	1
TCGA-DU-A6S6	Brain Lower Grade Glioma (TCGA, PanCancer Atlas)	1
TCGA-DU-A6S7	Brain Lower Grade Glioma (TCGA, PanCancer Atlas)	1
TCGA-DU-A6S8	Brain Lower Grade Glioma (TCGA, PanCancer Atlas)	1
TCGA-DU-A7T6	Brain Lower Grade Glioma (TCGA, PanCancer Atlas)	1
TCGA-DU-A7T8	Brain Lower Grade Glioma (TCGA, PanCancer Atlas)	1
TCGA-DU-A7TA	Brain Lower Grade Glioma (TCGA, PanCancer Atlas)	1
TCGA-DU-A7TB	Brain Lower Grade Glioma (TCGA, PanCancer Atlas)	1
TCGA-DU-A7TC	Brain Lower Grade Glioma (TCGA, PanCancer Atlas)	1
TCGA-DU-A7TD	Brain Lower Grade Glioma (TCGA, PanCancer Atlas)	1
TCGA-DU-A7TG	Brain Lower Grade Glioma (TCGA, PanCancer Atlas)	1
TCGA-DU-A7TI	Brain Lower Grade Glioma (TCGA, PanCancer Atlas)	1
TCGA-DU-A7TJ	Brain Lower Grade Glioma (TCGA, PanCancer Atlas)	1
TCGA-DU-A76K	Brain Lower Grade Glioma (TCGA, PanCancer Atlas)	1
TCGA-DU-A76L	Brain Lower Grade Glioma (TCGA, PanCancer Atlas)	1
TCGA-DU-A76O	Brain Lower Grade Glioma (TCGA, PanCancer Atlas)	1
TCGA-DU-A76R	Brain Lower Grade Glioma (TCGA, PanCancer Atlas)	1
TCGA-DU-5847	Brain Lower Grade Glioma (TCGA, PanCancer Atlas)	1
TCGA-DU-5849	Brain Lower Grade Glioma (TCGA, PanCancer Atlas)	1
TCGA-DU-5851	Brain Lower Grade Glioma (TCGA, PanCancer Atlas)	1
TCGA-DU-5852	Brain Lower Grade Glioma (TCGA, PanCancer Atlas)	1
TCGA-DU-5853	Brain Lower Grade Glioma (TCGA, PanCancer Atlas)	1
TCGA-DU-5854	Brain Lower Grade Glioma (TCGA, PanCancer Atlas)	1
TCGA-DU-5855	Brain Lower Grade Glioma (TCGA, PanCancer Atlas)	1
TCGA-DU-5870	Brain Lower Grade Glioma (TCGA, PanCancer Atlas)	1
TCGA-DU-5871	Brain Lower Grade Glioma (TCGA, PanCancer Atlas)	1
TCGA-DU-5872	Brain Lower Grade Glioma (TCGA, PanCancer Atlas)	1
TCGA-DU-5874	Brain Lower Grade Glioma (TCGA, PanCancer Atlas)	1
TCGA-DU-6392	Brain Lower Grade Glioma (TCGA, PanCancer Atlas)	1
TCGA-DU-6393	Brain Lower Grade Glioma (TCGA, PanCancer Atlas)	1
TCGA-DU-6394	Brain Lower Grade Glioma (TCGA, PanCancer Atlas)	1
TCGA-DU-6395	Brain Lower Grade Glioma (TCGA, PanCancer Atlas)	1
TCGA-DU-6396	Brain Lower Grade Glioma (TCGA, PanCancer Atlas)	1
TCGA-DU-6397	Brain Lower Grade Glioma (TCGA, PanCancer Atlas)	1
TCGA-DU-6399	Brain Lower Grade Glioma (TCGA, PanCancer Atlas)	1
TCGA-DU-6400	Brain Lower Grade Glioma (TCGA, PanCancer Atlas)	1
TCGA-DU-6401	Brain Lower Grade Glioma (TCGA, PanCancer Atlas)	1
TCGA-DU-6402	Brain Lower Grade Glioma (TCGA, PanCancer Atlas)	1
TCGA-DU-6403	Brain Lower Grade Glioma (TCGA, PanCancer Atlas)	1
TCGA-DU-6404	Brain Lower Grade Glioma (TCGA, PanCancer Atlas)	1
TCGA-DU-6405	Brain Lower Grade Glioma (TCGA, PanCancer Atlas)	1
TCGA-DU-6406	Brain Lower Grade Glioma (TCGA, PanCancer Atlas)	1
TCGA-DU-6407	Brain Lower Grade Glioma (TCGA, PanCancer Atlas)	1
TCGA-DU-6408	Brain Lower Grade Glioma (TCGA, PanCancer Atlas)	1
TCGA-DU-6410	Brain Lower Grade Glioma (TCGA, PanCancer Atlas)	1
TCGA-DU-6542	Brain Lower Grade Glioma (TCGA, PanCancer Atlas)	1
TCGA-DU-7006	Brain Lower Grade Glioma (TCGA, PanCancer Atlas)	1
TCGA-DU-7007	Brain Lower Grade Glioma (TCGA, PanCancer Atlas)	1
TCGA-DU-7008	Brain Lower Grade Glioma (TCGA, PanCancer Atlas)	1
TCGA-DU-7009	Brain Lower Grade Glioma (TCGA, PanCancer Atlas)	1
TCGA-DU-7010	Brain Lower Grade Glioma (TCGA, PanCancer Atlas)	1
TCGA-DU-7011	Brain Lower Grade Glioma (TCGA, PanCancer Atlas)	1
TCGA-DU-7012	Brain Lower Grade Glioma (TCGA, PanCancer Atlas)	1
TCGA-DU-7013	Brain Lower Grade Glioma (TCGA, PanCancer Atlas)	1
TCGA-DU-7014	Brain Lower Grade Glioma (TCGA, PanCancer Atlas)	1
TCGA-DU-7015	Brain Lower Grade Glioma (TCGA, PanCancer Atlas)	1
TCGA-DU-7018	Brain Lower Grade Glioma (TCGA, PanCancer Atlas)	1
TCGA-DU-7019	Brain Lower Grade Glioma (TCGA, PanCancer Atlas)	1
TCGA-DU-7290	Brain Lower Grade Glioma (TCGA, PanCancer Atlas)	1
TCGA-DU-7292	Brain Lower Grade Glioma (TCGA, PanCancer Atlas)	1
TCGA-DU-7294	Brain Lower Grade Glioma (TCGA, PanCancer Atlas)	1
TCGA-DU-7298	Brain Lower Grade Glioma (TCGA, PanCancer Atlas)	1
TCGA-DU-7299	Brain Lower Grade Glioma (TCGA, PanCancer Atlas)	1
TCGA-DU-7300	Brain Lower Grade Glioma (TCGA, PanCancer Atlas)	1
TCGA-DU-7301	Brain Lower Grade Glioma (TCGA, PanCancer Atlas)	1
TCGA-DU-7302	Brain Lower Grade Glioma (TCGA, PanCancer Atlas)	1
TCGA-DU-7304	Brain Lower Grade Glioma (TCGA, PanCancer Atlas)	1
TCGA-DU-7306	Brain Lower Grade Glioma (TCGA, PanCancer Atlas)	1
TCGA-DU-7309	Brain Lower Grade Glioma (TCGA, PanCancer Atlas)	1
TCGA-DU-8158	Brain Lower Grade Glioma (TCGA, PanCancer Atlas)	1
TCGA-DU-8161	Brain Lower Grade Glioma (TCGA, PanCancer Atlas)	1
TCGA-DU-8162	Brain Lower Grade Glioma (TCGA, PanCancer Atlas)	1
TCGA-DU-8163	Brain Lower Grade Glioma (TCGA, PanCancer Atlas)	1
TCGA-DU-8164	Brain Lower Grade Glioma (TCGA, PanCancer Atlas)	1
TCGA-DU-8165	Brain Lower Grade Glioma (TCGA, PanCancer Atlas)	1
TCGA-DU-8166	Brain Lower Grade Glioma (TCGA, PanCancer Atlas)	1
TCGA-DU-8167	Brain Lower Grade Glioma (TCGA, PanCancer Atlas)	1
TCGA-DU-8168	Brain Lower Grade Glioma (TCGA, PanCancer Atlas)	1
TCGA-E1-A7YD	Brain Lower Grade Glioma (TCGA, PanCancer Atlas)	1
TCGA-E1-A7YE	Brain Lower Grade Glioma (TCGA, PanCancer Atlas)	1
TCGA-E1-A7YH	Brain Lower Grade Glioma (TCGA, PanCancer Atlas)	1
TCGA-E1-A7YI	Brain Lower Grade Glioma (TCGA, PanCancer Atlas)	1
TCGA-E1-A7YJ	Brain Lower Grade Glioma (TCGA, PanCancer Atlas)	1
TCGA-E1-A7YK	Brain Lower Grade Glioma (TCGA, PanCancer Atlas)	1
TCGA-E1-A7YL	Brain Lower Grade Glioma (TCGA, PanCancer Atlas)	1
TCGA-E1-A7YM	Brain Lower Grade Glioma (TCGA, PanCancer Atlas)	1
TCGA-E1-A7YN	Brain Lower Grade Glioma (TCGA, PanCancer Atlas)	1
TCGA-E1-A7YO	Brain Lower Grade Glioma (TCGA, PanCancer Atlas)	1
TCGA-E1-A7YQ	Brain Lower Grade Glioma (TCGA, PanCancer Atlas)	1
TCGA-E1-A7YS	Brain Lower Grade Glioma (TCGA, PanCancer Atlas)	1
TCGA-E1-A7YU	Brain Lower Grade Glioma (TCGA, PanCancer Atlas)	1
TCGA-E1-A7YV	Brain Lower Grade Glioma (TCGA, PanCancer Atlas)	1
TCGA-E1-A7YW	Brain Lower Grade Glioma (TCGA, PanCancer Atlas)	1
TCGA-E1-A7YY	Brain Lower Grade Glioma (TCGA, PanCancer Atlas)	1
TCGA-E1-A7Z2	Brain Lower Grade Glioma (TCGA, PanCancer Atlas)	1
TCGA-E1-A7Z3	Brain Lower Grade Glioma (TCGA, PanCancer Atlas)	1
TCGA-E1-A7Z4	Brain Lower Grade Glioma (TCGA, PanCancer Atlas)	1
TCGA-E1-A7Z6	Brain Lower Grade Glioma (TCGA, PanCancer Atlas)	1
TCGA-E1-5302	Brain Lower Grade Glioma (TCGA, PanCancer Atlas)	1
TCGA-E1-5303	Brain Lower Grade Glioma (TCGA, PanCancer Atlas)	1
TCGA-E1-5304	Brain Lower Grade Glioma (TCGA, PanCancer Atlas)	1
TCGA-E1-5305	Brain Lower Grade Glioma (TCGA, PanCancer Atlas)	1
TCGA-E1-5307	Brain Lower Grade Glioma (TCGA, PanCancer Atlas)	1
TCGA-E1-5311	Brain Lower Grade Glioma (TCGA, PanCancer Atlas)	1
TCGA-E1-5318	Brain Lower Grade Glioma (TCGA, PanCancer Atlas)	1
TCGA-E1-5319	Brain Lower Grade Glioma (TCGA, PanCancer Atlas)	1
TCGA-E1-5322	Brain Lower Grade Glioma (TCGA, PanCancer Atlas)	1
TCGA-EZ-7264	Brain Lower Grade Glioma (TCGA, PanCancer Atlas)	1
TCGA-F6-A8O3	Brain Lower Grade Glioma (TCGA, PanCancer Atlas)	1
TCGA-F6-A8O4	Brain Lower Grade Glioma (TCGA, PanCancer Atlas)	1
TCGA-FG-A4MT	Brain Lower Grade Glioma (TCGA, PanCancer Atlas)	1
TCGA-FG-A4MU	Brain Lower Grade Glioma (TCGA, PanCancer Atlas)	1
TCGA-FG-A4MW	Brain Lower Grade Glioma (TCGA, PanCancer Atlas)	1
TCGA-FG-A4MX	Brain Lower Grade Glioma (TCGA, PanCancer Atlas)	1
TCGA-FG-A4MY	Brain Lower Grade Glioma (TCGA, PanCancer Atlas)	1
TCGA-FG-A6IZ	Brain Lower Grade Glioma (TCGA, PanCancer Atlas)	1
TCGA-FG-A6J1	Brain Lower Grade Glioma (TCGA, PanCancer Atlas)	1
TCGA-FG-A6J3	Brain Lower Grade Glioma (TCGA, PanCancer Atlas)	1
TCGA-FG-A60J	Brain Lower Grade Glioma (TCGA, PanCancer Atlas)	1
TCGA-FG-A60K	Brain Lower Grade Glioma (TCGA, PanCancer Atlas)	1
TCGA-FG-A60L	Brain Lower Grade Glioma (TCGA, PanCancer Atlas)	1
TCGA-FG-A70Y	Brain Lower Grade Glioma (TCGA, PanCancer Atlas)	1
TCGA-FG-A70Z	Brain Lower Grade Glioma (TCGA, PanCancer Atlas)	1
TCGA-FG-A87N	Brain Lower Grade Glioma (TCGA, PanCancer Atlas)	1
TCGA-FG-A87Q	Brain Lower Grade Glioma (TCGA, PanCancer Atlas)	1
TCGA-FG-A710	Brain Lower Grade Glioma (TCGA, PanCancer Atlas)	1
TCGA-FG-A711	Brain Lower Grade Glioma (TCGA, PanCancer Atlas)	1
TCGA-FG-A713	Brain Lower Grade Glioma (TCGA, PanCancer Atlas)	1
TCGA-FG-5962	Brain Lower Grade Glioma (TCGA, PanCancer Atlas)	1
TCGA-FG-5963	Brain Lower Grade Glioma (TCGA, PanCancer Atlas)	1
TCGA-FG-5964	Brain Lower Grade Glioma (TCGA, PanCancer Atlas)	1
TCGA-FG-5965	Brain Lower Grade Glioma (TCGA, PanCancer Atlas)	1
TCGA-FG-6688	Brain Lower Grade Glioma (TCGA, PanCancer Atlas)	1
TCGA-FG-6689	Brain Lower Grade Glioma (TCGA, PanCancer Atlas)	1
TCGA-FG-6690	Brain Lower Grade Glioma (TCGA, PanCancer Atlas)	1
TCGA-FG-6691	Brain Lower Grade Glioma (TCGA, PanCancer Atlas)	1
TCGA-FG-6692	Brain Lower Grade Glioma (TCGA, PanCancer Atlas)	1
TCGA-FG-7634	Brain Lower Grade Glioma (TCGA, PanCancer Atlas)	1
TCGA-FG-7636	Brain Lower Grade Glioma (TCGA, PanCancer Atlas)	1
TCGA-FG-7638	Brain Lower Grade Glioma (TCGA, PanCancer Atlas)	1
TCGA-FG-7641	Brain Lower Grade Glioma (TCGA, PanCancer Atlas)	1
TCGA-FG-7643	Brain Lower Grade Glioma (TCGA, PanCancer Atlas)	1
TCGA-FG-8181	Brain Lower Grade Glioma (TCGA, PanCancer Atlas)	1
TCGA-FG-8182	Brain Lower Grade Glioma (TCGA, PanCancer Atlas)	1
TCGA-FG-8185	Brain Lower Grade Glioma (TCGA, PanCancer Atlas)	1
TCGA-FG-8186	Brain Lower Grade Glioma (TCGA, PanCancer Atlas)	1
TCGA-FG-8187	Brain Lower Grade Glioma (TCGA, PanCancer Atlas)	1
TCGA-FG-8188	Brain Lower Grade Glioma (TCGA, PanCancer Atlas)	1
TCGA-FG-8189	Brain Lower Grade Glioma (TCGA, PanCancer Atlas)	1
TCGA-FG-8191	Brain Lower Grade Glioma (TCGA, PanCancer Atlas)	1
TCGA-FN-7833	Brain Lower Grade Glioma (TCGA, PanCancer Atlas)	1
TCGA-HT-A4DS	Brain Lower Grade Glioma (TCGA, PanCancer Atlas)	1
TCGA-HT-A4DV	Brain Lower Grade Glioma (TCGA, PanCancer Atlas)	1
TCGA-HT-A5R5	Brain Lower Grade Glioma (TCGA, PanCancer Atlas)	1
TCGA-HT-A5R7	Brain Lower Grade Glioma (TCGA, PanCancer Atlas)	1
TCGA-HT-A5R9	Brain Lower Grade Glioma (TCGA, PanCancer Atlas)	1
TCGA-HT-A5RA	Brain Lower Grade Glioma (TCGA, PanCancer Atlas)	1
TCGA-HT-A5RB	Brain Lower Grade Glioma (TCGA, PanCancer Atlas)	1
TCGA-HT-A5RC	Brain Lower Grade Glioma (TCGA, PanCancer Atlas)	1
TCGA-HT-A61B	Brain Lower Grade Glioma (TCGA, PanCancer Atlas)	1
TCGA-HT-A61C	Brain Lower Grade Glioma (TCGA, PanCancer Atlas)	1
TCGA-HT-A74H	Brain Lower Grade Glioma (TCGA, PanCancer Atlas)	1
TCGA-HT-A74J	Brain Lower Grade Glioma (TCGA, PanCancer Atlas)	1
TCGA-HT-A74K	Brain Lower Grade Glioma (TCGA, PanCancer Atlas)	1
TCGA-HT-A74L	Brain Lower Grade Glioma (TCGA, PanCancer Atlas)	1
TCGA-HT-A74O	Brain Lower Grade Glioma (TCGA, PanCancer Atlas)	1
TCGA-HT-A614	Brain Lower Grade Glioma (TCGA, PanCancer Atlas)	1
TCGA-HT-A615	Brain Lower Grade Glioma (TCGA, PanCancer Atlas)	1
TCGA-HT-A616	Brain Lower Grade Glioma (TCGA, PanCancer Atlas)	1
TCGA-HT-A617	Brain Lower Grade Glioma (TCGA, PanCancer Atlas)	1
TCGA-HT-A618	Brain Lower Grade Glioma (TCGA, PanCancer Atlas)	1
TCGA-HT-7467	Brain Lower Grade Glioma (TCGA, PanCancer Atlas)	1
TCGA-HT-7468	Brain Lower Grade Glioma (TCGA, PanCancer Atlas)	1
TCGA-HT-7469	Brain Lower Grade Glioma (TCGA, PanCancer Atlas)	1
TCGA-HT-7470	Brain Lower Grade Glioma (TCGA, PanCancer Atlas)	1
TCGA-HT-7471	Brain Lower Grade Glioma (TCGA, PanCancer Atlas)	1
TCGA-HT-7472	Brain Lower Grade Glioma (TCGA, PanCancer Atlas)	1
TCGA-HT-7473	Brain Lower Grade Glioma (TCGA, PanCancer Atlas)	1
TCGA-HT-7474	Brain Lower Grade Glioma (TCGA, PanCancer Atlas)	1
TCGA-HT-7475	Brain Lower Grade Glioma (TCGA, PanCancer Atlas)	1
TCGA-HT-7476	Brain Lower Grade Glioma (TCGA, PanCancer Atlas)	1
TCGA-HT-7477	Brain Lower Grade Glioma (TCGA, PanCancer Atlas)	1
TCGA-HT-7478	Brain Lower Grade Glioma (TCGA, PanCancer Atlas)	1
TCGA-HT-7479	Brain Lower Grade Glioma (TCGA, PanCancer Atlas)	1
TCGA-HT-7480	Brain Lower Grade Glioma (TCGA, PanCancer Atlas)	1
TCGA-HT-7481	Brain Lower Grade Glioma (TCGA, PanCancer Atlas)	1
TCGA-HT-7482	Brain Lower Grade Glioma (TCGA, PanCancer Atlas)	1
TCGA-HT-7483	Brain Lower Grade Glioma (TCGA, PanCancer Atlas)	1
TCGA-HT-7485	Brain Lower Grade Glioma (TCGA, PanCancer Atlas)	1
TCGA-HT-7601	Brain Lower Grade Glioma (TCGA, PanCancer Atlas)	1
TCGA-HT-7602	Brain Lower Grade Glioma (TCGA, PanCancer Atlas)	1
TCGA-HT-7603	Brain Lower Grade Glioma (TCGA, PanCancer Atlas)	1
TCGA-HT-7604	Brain Lower Grade Glioma (TCGA, PanCancer Atlas)	1
TCGA-HT-7605	Brain Lower Grade Glioma (TCGA, PanCancer Atlas)	1
TCGA-HT-7606	Brain Lower Grade Glioma (TCGA, PanCancer Atlas)	1
TCGA-HT-7607	Brain Lower Grade Glioma (TCGA, PanCancer Atlas)	1
TCGA-HT-7608	Brain Lower Grade Glioma (TCGA, PanCancer Atlas)	1
TCGA-HT-7609	Brain Lower Grade Glioma (TCGA, PanCancer Atlas)	1
TCGA-HT-7610	Brain Lower Grade Glioma (TCGA, PanCancer Atlas)	1
TCGA-HT-7611	Brain Lower Grade Glioma (TCGA, PanCancer Atlas)	1
TCGA-HT-7616	Brain Lower Grade Glioma (TCGA, PanCancer Atlas)	1
TCGA-HT-7620	Brain Lower Grade Glioma (TCGA, PanCancer Atlas)	1
TCGA-HT-7676	Brain Lower Grade Glioma (TCGA, PanCancer Atlas)	1
TCGA-HT-7677	Brain Lower Grade Glioma (TCGA, PanCancer Atlas)	1
TCGA-HT-7680	Brain Lower Grade Glioma (TCGA, PanCancer Atlas)	1
TCGA-HT-7681	Brain Lower Grade Glioma (TCGA, PanCancer Atlas)	1
TCGA-HT-7684	Brain Lower Grade Glioma (TCGA, PanCancer Atlas)	1
TCGA-HT-7686	Brain Lower Grade Glioma (TCGA, PanCancer Atlas)	1
TCGA-HT-7687	Brain Lower Grade Glioma (TCGA, PanCancer Atlas)	1
TCGA-HT-7688	Brain Lower Grade Glioma (TCGA, PanCancer Atlas)	1
TCGA-HT-7689	Brain Lower Grade Glioma (TCGA, PanCancer Atlas)	1
TCGA-HT-7690	Brain Lower Grade Glioma (TCGA, PanCancer Atlas)	1
TCGA-HT-7691	Brain Lower Grade Glioma (TCGA, PanCancer Atlas)	1
TCGA-HT-7692	Brain Lower Grade Glioma (TCGA, PanCancer Atlas)	1
TCGA-HT-7693	Brain Lower Grade Glioma (TCGA, PanCancer Atlas)	1
TCGA-HT-7694	Brain Lower Grade Glioma (TCGA, PanCancer Atlas)	1
TCGA-HT-7695	Brain Lower Grade Glioma (TCGA, PanCancer Atlas)	1
TCGA-HT-7854	Brain Lower Grade Glioma (TCGA, PanCancer Atlas)	1
TCGA-HT-7855	Brain Lower Grade Glioma (TCGA, PanCancer Atlas)	1
TCGA-HT-7856	Brain Lower Grade Glioma (TCGA, PanCancer Atlas)	1
TCGA-HT-7857	Brain Lower Grade Glioma (TCGA, PanCancer Atlas)	1
TCGA-HT-7858	Brain Lower Grade Glioma (TCGA, PanCancer Atlas)	1
TCGA-HT-7860	Brain Lower Grade Glioma (TCGA, PanCancer Atlas)	1
TCGA-HT-7873	Brain Lower Grade Glioma (TCGA, PanCancer Atlas)	1
TCGA-HT-7874	Brain Lower Grade Glioma (TCGA, PanCancer Atlas)	1
TCGA-HT-7875	Brain Lower Grade Glioma (TCGA, PanCancer Atlas)	1
TCGA-HT-7877	Brain Lower Grade Glioma (TCGA, PanCancer Atlas)	1
TCGA-HT-7879	Brain Lower Grade Glioma (TCGA, PanCancer Atlas)	1
TCGA-HT-7880	Brain Lower Grade Glioma (TCGA, PanCancer Atlas)	1
TCGA-HT-7881	Brain Lower Grade Glioma (TCGA, PanCancer Atlas)	1
TCGA-HT-7882	Brain Lower Grade Glioma (TCGA, PanCancer Atlas)	1
TCGA-HT-7884	Brain Lower Grade Glioma (TCGA, PanCancer Atlas)	1
TCGA-HT-7902	Brain Lower Grade Glioma (TCGA, PanCancer Atlas)	1
TCGA-HT-8010	Brain Lower Grade Glioma (TCGA, PanCancer Atlas)	1
TCGA-HT-8011	Brain Lower Grade Glioma (TCGA, PanCancer Atlas)	1
TCGA-HT-8012	Brain Lower Grade Glioma (TCGA, PanCancer Atlas)	1
TCGA-HT-8013	Brain Lower Grade Glioma (TCGA, PanCancer Atlas)	1
TCGA-HT-8015	Brain Lower Grade Glioma (TCGA, PanCancer Atlas)	1
TCGA-HT-8018	Brain Lower Grade Glioma (TCGA, PanCancer Atlas)	1
TCGA-HT-8019	Brain Lower Grade Glioma (TCGA, PanCancer Atlas)	1
TCGA-HT-8104	Brain Lower Grade Glioma (TCGA, PanCancer Atlas)	1
TCGA-HT-8105	Brain Lower Grade Glioma (TCGA, PanCancer Atlas)	1
TCGA-HT-8106	Brain Lower Grade Glioma (TCGA, PanCancer Atlas)	1
TCGA-HT-8107	Brain Lower Grade Glioma (TCGA, PanCancer Atlas)	1
TCGA-HT-8108	Brain Lower Grade Glioma (TCGA, PanCancer Atlas)	1
TCGA-HT-8109	Brain Lower Grade Glioma (TCGA, PanCancer Atlas)	1
TCGA-HT-8110	Brain Lower Grade Glioma (TCGA, PanCancer Atlas)	1
TCGA-HT-8111	Brain Lower Grade Glioma (TCGA, PanCancer Atlas)	1
TCGA-HT-8113	Brain Lower Grade Glioma (TCGA, PanCancer Atlas)	1
TCGA-HT-8114	Brain Lower Grade Glioma (TCGA, PanCancer Atlas)	1
TCGA-HT-8563	Brain Lower Grade Glioma (TCGA, PanCancer Atlas)	1
TCGA-HT-8564	Brain Lower Grade Glioma (TCGA, PanCancer Atlas)	1
TCGA-HW-A5KJ	Brain Lower Grade Glioma (TCGA, PanCancer Atlas)	1
TCGA-HW-A5KK	Brain Lower Grade Glioma (TCGA, PanCancer Atlas)	1
TCGA-HW-A5KL	Brain Lower Grade Glioma (TCGA, PanCancer Atlas)	1
TCGA-HW-A5KM	Brain Lower Grade Glioma (TCGA, PanCancer Atlas)	1
TCGA-HW-7486	Brain Lower Grade Glioma (TCGA, PanCancer Atlas)	1
TCGA-HW-7487	Brain Lower Grade Glioma (TCGA, PanCancer Atlas)	1
TCGA-HW-7489	Brain Lower Grade Glioma (TCGA, PanCancer Atlas)	1
TCGA-HW-7490	Brain Lower Grade Glioma (TCGA, PanCancer Atlas)	1
TCGA-HW-7491	Brain Lower Grade Glioma (TCGA, PanCancer Atlas)	1
TCGA-HW-7493	Brain Lower Grade Glioma (TCGA, PanCancer Atlas)	1
TCGA-HW-7495	Brain Lower Grade Glioma (TCGA, PanCancer Atlas)	1
TCGA-HW-8319	Brain Lower Grade Glioma (TCGA, PanCancer Atlas)	1
TCGA-HW-8320	Brain Lower Grade Glioma (TCGA, PanCancer Atlas)	1
TCGA-HW-8321	Brain Lower Grade Glioma (TCGA, PanCancer Atlas)	1
TCGA-HW-8322	Brain Lower Grade Glioma (TCGA, PanCancer Atlas)	1
TCGA-IK-7675	Brain Lower Grade Glioma (TCGA, PanCancer Atlas)	1
TCGA-IK-8125	Brain Lower Grade Glioma (TCGA, PanCancer Atlas)	1
TCGA-KT-A7W1	Brain Lower Grade Glioma (TCGA, PanCancer Atlas)	1
TCGA-KT-A74X	Brain Lower Grade Glioma (TCGA, PanCancer Atlas)	1
TCGA-P5-A5ET	Brain Lower Grade Glioma (TCGA, PanCancer Atlas)	1
TCGA-P5-A5EU	Brain Lower Grade Glioma (TCGA, PanCancer Atlas)	1
TCGA-P5-A5EV	Brain Lower Grade Glioma (TCGA, PanCancer Atlas)	1
TCGA-P5-A5EW	Brain Lower Grade Glioma (TCGA, PanCancer Atlas)	1
TCGA-P5-A5EX	Brain Lower Grade Glioma (TCGA, PanCancer Atlas)	1
TCGA-P5-A5EY	Brain Lower Grade Glioma (TCGA, PanCancer Atlas)	1
TCGA-P5-A5EZ	Brain Lower Grade Glioma (TCGA, PanCancer Atlas)	1
TCGA-P5-A5F0	Brain Lower Grade Glioma (TCGA, PanCancer Atlas)	1
TCGA-P5-A5F1	Brain Lower Grade Glioma (TCGA, PanCancer Atlas)	1
TCGA-P5-A5F2	Brain Lower Grade Glioma (TCGA, PanCancer Atlas)	1
TCGA-P5-A5F4	Brain Lower Grade Glioma (TCGA, PanCancer Atlas)	1
TCGA-P5-A5F6	Brain Lower Grade Glioma (TCGA, PanCancer Atlas)	1
TCGA-P5-A72U	Brain Lower Grade Glioma (TCGA, PanCancer Atlas)	1
TCGA-P5-A72W	Brain Lower Grade Glioma (TCGA, PanCancer Atlas)	1
TCGA-P5-A72X	Brain Lower Grade Glioma (TCGA, PanCancer Atlas)	1
TCGA-P5-A72Z	Brain Lower Grade Glioma (TCGA, PanCancer Atlas)	1
TCGA-P5-A77W	Brain Lower Grade Glioma (TCGA, PanCancer Atlas)	1
TCGA-P5-A77X	Brain Lower Grade Glioma (TCGA, PanCancer Atlas)	1
TCGA-P5-A730	Brain Lower Grade Glioma (TCGA, PanCancer Atlas)	1
TCGA-P5-A731	Brain Lower Grade Glioma (TCGA, PanCancer Atlas)	1
TCGA-P5-A733	Brain Lower Grade Glioma (TCGA, PanCancer Atlas)	1
TCGA-P5-A735	Brain Lower Grade Glioma (TCGA, PanCancer Atlas)	1
TCGA-P5-A736	Brain Lower Grade Glioma (TCGA, PanCancer Atlas)	1
TCGA-P5-A737	Brain Lower Grade Glioma (TCGA, PanCancer Atlas)	1
TCGA-P5-A780	Brain Lower Grade Glioma (TCGA, PanCancer Atlas)	1
TCGA-P5-A781	Brain Lower Grade Glioma (TCGA, PanCancer Atlas)	1
TCGA-QH-A6CS	Brain Lower Grade Glioma (TCGA, PanCancer Atlas)	1
TCGA-QH-A6CU	Brain Lower Grade Glioma (TCGA, PanCancer Atlas)	1
TCGA-QH-A6CV	Brain Lower Grade Glioma (TCGA, PanCancer Atlas)	1
TCGA-QH-A6CW	Brain Lower Grade Glioma (TCGA, PanCancer Atlas)	1
TCGA-QH-A6CX	Brain Lower Grade Glioma (TCGA, PanCancer Atlas)	1
TCGA-QH-A6CY	Brain Lower Grade Glioma (TCGA, PanCancer Atlas)	1
TCGA-QH-A6CZ	Brain Lower Grade Glioma (TCGA, PanCancer Atlas)	1
TCGA-QH-A6X3	Brain Lower Grade Glioma (TCGA, PanCancer Atlas)	1
TCGA-QH-A6X4	Brain Lower Grade Glioma (TCGA, PanCancer Atlas)	1
TCGA-QH-A6X5	Brain Lower Grade Glioma (TCGA, PanCancer Atlas)	1
TCGA-QH-A6X8	Brain Lower Grade Glioma (TCGA, PanCancer Atlas)	1
TCGA-QH-A6X9	Brain Lower Grade Glioma (TCGA, PanCancer Atlas)	1
TCGA-QH-A6XA	Brain Lower Grade Glioma (TCGA, PanCancer Atlas)	1
TCGA-QH-A6XC	Brain Lower Grade Glioma (TCGA, PanCancer Atlas)	1
TCGA-QH-A65R	Brain Lower Grade Glioma (TCGA, PanCancer Atlas)	1
TCGA-QH-A65S	Brain Lower Grade Glioma (TCGA, PanCancer Atlas)	1
TCGA-QH-A65V	Brain Lower Grade Glioma (TCGA, PanCancer Atlas)	1
TCGA-QH-A65X	Brain Lower Grade Glioma (TCGA, PanCancer Atlas)	1
TCGA-QH-A65Z	Brain Lower Grade Glioma (TCGA, PanCancer Atlas)	1
TCGA-QH-A86X	Brain Lower Grade Glioma (TCGA, PanCancer Atlas)	1
TCGA-QH-A870	Brain Lower Grade Glioma (TCGA, PanCancer Atlas)	1
TCGA-R8-A6MK	Brain Lower Grade Glioma (TCGA, PanCancer Atlas)	1
TCGA-R8-A6ML	Brain Lower Grade Glioma (TCGA, PanCancer Atlas)	1
TCGA-R8-A6MO	Brain Lower Grade Glioma (TCGA, PanCancer Atlas)	1
TCGA-R8-A6YH	Brain Lower Grade Glioma (TCGA, PanCancer Atlas)	1
TCGA-RY-A83X	Brain Lower Grade Glioma (TCGA, PanCancer Atlas)	1
TCGA-RY-A83Y	Brain Lower Grade Glioma (TCGA, PanCancer Atlas)	1
TCGA-RY-A83Z	Brain Lower Grade Glioma (TCGA, PanCancer Atlas)	1
TCGA-RY-A840	Brain Lower Grade Glioma (TCGA, PanCancer Atlas)	1
TCGA-RY-A843	Brain Lower Grade Glioma (TCGA, PanCancer Atlas)	1
TCGA-RY-A845	Brain Lower Grade Glioma (TCGA, PanCancer Atlas)	1
TCGA-RY-A847	Brain Lower Grade Glioma (TCGA, PanCancer Atlas)	1
TCGA-S9-A6TS	Brain Lower Grade Glioma (TCGA, PanCancer Atlas)	1
TCGA-S9-A6TU	Brain Lower Grade Glioma (TCGA, PanCancer Atlas)	1
TCGA-S9-A6TV	Brain Lower Grade Glioma (TCGA, PanCancer Atlas)	1
TCGA-S9-A6TW	Brain Lower Grade Glioma (TCGA, PanCancer Atlas)	1
TCGA-S9-A6TX	Brain Lower Grade Glioma (TCGA, PanCancer Atlas)	1
TCGA-S9-A6TY	Brain Lower Grade Glioma (TCGA, PanCancer Atlas)	1
TCGA-S9-A6TZ	Brain Lower Grade Glioma (TCGA, PanCancer Atlas)	1
TCGA-S9-A6U0	Brain Lower Grade Glioma (TCGA, PanCancer Atlas)	1
TCGA-S9-A6U1	Brain Lower Grade Glioma (TCGA, PanCancer Atlas)	1
TCGA-S9-A6U2	Brain Lower Grade Glioma (TCGA, PanCancer Atlas)	1
TCGA-S9-A6U5	Brain Lower Grade Glioma (TCGA, PanCancer Atlas)	1
TCGA-S9-A6U6	Brain Lower Grade Glioma (TCGA, PanCancer Atlas)	1
TCGA-S9-A6U8	Brain Lower Grade Glioma (TCGA, PanCancer Atlas)	1
TCGA-S9-A6U9	Brain Lower Grade Glioma (TCGA, PanCancer Atlas)	1
TCGA-S9-A6UA	Brain Lower Grade Glioma (TCGA, PanCancer Atlas)	1
TCGA-S9-A6UB	Brain Lower Grade Glioma (TCGA, PanCancer Atlas)	1
TCGA-S9-A6WD	Brain Lower Grade Glioma (TCGA, PanCancer Atlas)	1
TCGA-S9-A6WE	Brain Lower Grade Glioma (TCGA, PanCancer Atlas)	1
TCGA-S9-A6WG	Brain Lower Grade Glioma (TCGA, PanCancer Atlas)	1
TCGA-S9-A6WH	Brain Lower Grade Glioma (TCGA, PanCancer Atlas)	1
TCGA-S9-A6WI	Brain Lower Grade Glioma (TCGA, PanCancer Atlas)	1
TCGA-S9-A6WL	Brain Lower Grade Glioma (TCGA, PanCancer Atlas)	1
TCGA-S9-A6WM	Brain Lower Grade Glioma (TCGA, PanCancer Atlas)	1
TCGA-S9-A6WN	Brain Lower Grade Glioma (TCGA, PanCancer Atlas)	1
TCGA-S9-A6WO	Brain Lower Grade Glioma (TCGA, PanCancer Atlas)	1
TCGA-S9-A6WP	Brain Lower Grade Glioma (TCGA, PanCancer Atlas)	1
TCGA-S9-A6WQ	Brain Lower Grade Glioma (TCGA, PanCancer Atlas)	1
TCGA-S9-A7IQ	Brain Lower Grade Glioma (TCGA, PanCancer Atlas)	1
TCGA-S9-A7IS	Brain Lower Grade Glioma (TCGA, PanCancer Atlas)	1
TCGA-S9-A7IX	Brain Lower Grade Glioma (TCGA, PanCancer Atlas)	1
TCGA-S9-A7IY	Brain Lower Grade Glioma (TCGA, PanCancer Atlas)	1
TCGA-S9-A7IZ	Brain Lower Grade Glioma (TCGA, PanCancer Atlas)	1
TCGA-S9-A7J0	Brain Lower Grade Glioma (TCGA, PanCancer Atlas)	1
TCGA-S9-A7J1	Brain Lower Grade Glioma (TCGA, PanCancer Atlas)	1
TCGA-S9-A7J2	Brain Lower Grade Glioma (TCGA, PanCancer Atlas)	1
TCGA-S9-A7J3	Brain Lower Grade Glioma (TCGA, PanCancer Atlas)	1
TCGA-S9-A7QW	Brain Lower Grade Glioma (TCGA, PanCancer Atlas)	1
TCGA-S9-A7QX	Brain Lower Grade Glioma (TCGA, PanCancer Atlas)	1
TCGA-S9-A7QY	Brain Lower Grade Glioma (TCGA, PanCancer Atlas)	1
TCGA-S9-A7QZ	Brain Lower Grade Glioma (TCGA, PanCancer Atlas)	1
TCGA-S9-A7R1	Brain Lower Grade Glioma (TCGA, PanCancer Atlas)	1
TCGA-S9-A7R2	Brain Lower Grade Glioma (TCGA, PanCancer Atlas)	1
TCGA-S9-A7R3	Brain Lower Grade Glioma (TCGA, PanCancer Atlas)	1
TCGA-S9-A7R4	Brain Lower Grade Glioma (TCGA, PanCancer Atlas)	1
TCGA-S9-A7R7	Brain Lower Grade Glioma (TCGA, PanCancer Atlas)	1
TCGA-S9-A7R8	Brain Lower Grade Glioma (TCGA, PanCancer Atlas)	1
TCGA-S9-A89V	Brain Lower Grade Glioma (TCGA, PanCancer Atlas)	1
TCGA-S9-A89Z	Brain Lower Grade Glioma (TCGA, PanCancer Atlas)	1
TCGA-TM-A7C3	Brain Lower Grade Glioma (TCGA, PanCancer Atlas)	1
TCGA-TM-A7C4	Brain Lower Grade Glioma (TCGA, PanCancer Atlas)	1
TCGA-TM-A7C5	Brain Lower Grade Glioma (TCGA, PanCancer Atlas)	1
TCGA-TM-A7CA	Brain Lower Grade Glioma (TCGA, PanCancer Atlas)	1
TCGA-TM-A7CF	Brain Lower Grade Glioma (TCGA, PanCancer Atlas)	1
TCGA-TM-A84B	Brain Lower Grade Glioma (TCGA, PanCancer Atlas)	1
TCGA-TM-A84C	Brain Lower Grade Glioma (TCGA, PanCancer Atlas)	1
TCGA-TM-A84F	Brain Lower Grade Glioma (TCGA, PanCancer Atlas)	1
TCGA-TM-A84G	Brain Lower Grade Glioma (TCGA, PanCancer Atlas)	1
TCGA-TM-A84H	Brain Lower Grade Glioma (TCGA, PanCancer Atlas)	1
TCGA-TM-A84I	Brain Lower Grade Glioma (TCGA, PanCancer Atlas)	1
TCGA-TM-A84J	Brain Lower Grade Glioma (TCGA, PanCancer Atlas)	1
TCGA-TM-A84L	Brain Lower Grade Glioma (TCGA, PanCancer Atlas)	1
TCGA-TM-A84M	Brain Lower Grade Glioma (TCGA, PanCancer Atlas)	1
TCGA-TM-A84O	Brain Lower Grade Glioma (TCGA, PanCancer Atlas)	1
TCGA-TM-A84Q	Brain Lower Grade Glioma (TCGA, PanCancer Atlas)	1
TCGA-TM-A84R	Brain Lower Grade Glioma (TCGA, PanCancer Atlas)	1
TCGA-TM-A84S	Brain Lower Grade Glioma (TCGA, PanCancer Atlas)	1
TCGA-TM-A84T	Brain Lower Grade Glioma (TCGA, PanCancer Atlas)	1
TCGA-TQ-A7RF	Brain Lower Grade Glioma (TCGA, PanCancer Atlas)	1
TCGA-TQ-A7RG	Brain Lower Grade Glioma (TCGA, PanCancer Atlas)	1
TCGA-TQ-A7RH	Brain Lower Grade Glioma (TCGA, PanCancer Atlas)	1
TCGA-TQ-A7RI	Brain Lower Grade Glioma (TCGA, PanCancer Atlas)	1
TCGA-TQ-A7RJ	Brain Lower Grade Glioma (TCGA, PanCancer Atlas)	1
TCGA-TQ-A7RK	Brain Lower Grade Glioma (TCGA, PanCancer Atlas)	1
TCGA-TQ-A7RM	Brain Lower Grade Glioma (TCGA, PanCancer Atlas)	1
TCGA-TQ-A7RN	Brain Lower Grade Glioma (TCGA, PanCancer Atlas)	1
TCGA-TQ-A7RO	Brain Lower Grade Glioma (TCGA, PanCancer Atlas)	1
TCGA-TQ-A7RP	Brain Lower Grade Glioma (TCGA, PanCancer Atlas)	1
TCGA-TQ-A7RQ	Brain Lower Grade Glioma (TCGA, PanCancer Atlas)	1
TCGA-TQ-A7RS	Brain Lower Grade Glioma (TCGA, PanCancer Atlas)	1
TCGA-TQ-A7RU	Brain Lower Grade Glioma (TCGA, PanCancer Atlas)	1
TCGA-TQ-A7RV	Brain Lower Grade Glioma (TCGA, PanCancer Atlas)	1
TCGA-TQ-A7RW	Brain Lower Grade Glioma (TCGA, PanCancer Atlas)	1
TCGA-TQ-A8XE	Brain Lower Grade Glioma (TCGA, PanCancer Atlas)	1
TCGA-VM-A8C8	Brain Lower Grade Glioma (TCGA, PanCancer Atlas)	1
TCGA-VM-A8C9	Brain Lower Grade Glioma (TCGA, PanCancer Atlas)	1
TCGA-VM-A8CA	Brain Lower Grade Glioma (TCGA, PanCancer Atlas)	1
TCGA-VM-A8CB	Brain Lower Grade Glioma (TCGA, PanCancer Atlas)	1
TCGA-VM-A8CD	Brain Lower Grade Glioma (TCGA, PanCancer Atlas)	1
TCGA-VM-A8CE	Brain Lower Grade Glioma (TCGA, PanCancer Atlas)	1
TCGA-VM-A8CF	Brain Lower Grade Glioma (TCGA, PanCancer Atlas)	1
TCGA-VM-A8CH	Brain Lower Grade Glioma (TCGA, PanCancer Atlas)	1
TCGA-VV-A86M	Brain Lower Grade Glioma (TCGA, PanCancer Atlas)	1
TCGA-VV-A829	Brain Lower Grade Glioma (TCGA, PanCancer Atlas)	1
TCGA-VW-A7QS	Brain Lower Grade Glioma (TCGA, PanCancer Atlas)	1
TCGA-VW-A8FI	Brain Lower Grade Glioma (TCGA, PanCancer Atlas)	1
TCGA-W9-A837	Brain Lower Grade Glioma (TCGA, PanCancer Atlas)	1
TCGA-WH-A86K	Brain Lower Grade Glioma (TCGA, PanCancer Atlas)	1
TCGA-WY-A85A	Brain Lower Grade Glioma (TCGA, PanCancer Atlas)	1
TCGA-WY-A85B	Brain Lower Grade Glioma (TCGA, PanCancer Atlas)	1
TCGA-WY-A85C	Brain Lower Grade Glioma (TCGA, PanCancer Atlas)	1
TCGA-WY-A85D	Brain Lower Grade Glioma (TCGA, PanCancer Atlas)	1
TCGA-WY-A85E	Brain Lower Grade Glioma (TCGA, PanCancer Atlas)	1
TCGA-WY-A858	Brain Lower Grade Glioma (TCGA, PanCancer Atlas)	1
TCGA-WY-A859	Brain Lower Grade Glioma (TCGA, PanCancer Atlas)	1
TCGA-FG-7637	Brain Lower Grade Glioma (TCGA, PanCancer Atlas)	1
TCGA-HT-A61A	Brain Lower Grade Glioma (TCGA, PanCancer Atlas)	1
TCGA-HT-8558	Brain Lower Grade Glioma (TCGA, PanCancer Atlas)	1
TCGA-V7-A7HQ	Breast Invasive Carcinoma (TCGA, PanCancer Atlas)	1	Amplification
TCGA-A1-A0SG	Breast Invasive Carcinoma (TCGA, PanCancer Atlas)	1	Deep Deletion
TCGA-A2-A3XY	Breast Invasive Carcinoma (TCGA, PanCancer Atlas)	1	Deep Deletion
TCGA-A8-A06N	Breast Invasive Carcinoma (TCGA, PanCancer Atlas)	1	Deep Deletion
TCGA-A8-A06R	Breast Invasive Carcinoma (TCGA, PanCancer Atlas)	1	Deep Deletion
TCGA-A8-A08G	Breast Invasive Carcinoma (TCGA, PanCancer Atlas)	1	Deep Deletion
TCGA-A8-A08J	Breast Invasive Carcinoma (TCGA, PanCancer Atlas)	1	Deep Deletion
TCGA-A8-A092	Breast Invasive Carcinoma (TCGA, PanCancer Atlas)	1	Deep Deletion
TCGA-AC-A3YI	Breast Invasive Carcinoma (TCGA, PanCancer Atlas)	1	Deep Deletion
TCGA-AC-A8OP	Breast Invasive Carcinoma (TCGA, PanCancer Atlas)	1	Deep Deletion
TCGA-AN-A0AJ	Breast Invasive Carcinoma (TCGA, PanCancer Atlas)	1	Deep Deletion
TCGA-AN-A0FY	Breast Invasive Carcinoma (TCGA, PanCancer Atlas)	1	Deep Deletion
TCGA-AN-A0XN	Breast Invasive Carcinoma (TCGA, PanCancer Atlas)	1	Deep Deletion
TCGA-AQ-A04H	Breast Invasive Carcinoma (TCGA, PanCancer Atlas)	1	Deep Deletion
TCGA-AQ-A04L	Breast Invasive Carcinoma (TCGA, PanCancer Atlas)	1	Deep Deletion
TCGA-AR-A0TS	Breast Invasive Carcinoma (TCGA, PanCancer Atlas)	1	Deep Deletion
TCGA-AR-A0TT	Breast Invasive Carcinoma (TCGA, PanCancer Atlas)	1	Deep Deletion
TCGA-AR-A1AJ	Breast Invasive Carcinoma (TCGA, PanCancer Atlas)	1	Deep Deletion
TCGA-AR-A24H	Breast Invasive Carcinoma (TCGA, PanCancer Atlas)	1	Deep Deletion
TCGA-AR-A24S	Breast Invasive Carcinoma (TCGA, PanCancer Atlas)	1	Deep Deletion
TCGA-AR-A255	Breast Invasive Carcinoma (TCGA, PanCancer Atlas)	1	Deep Deletion
TCGA-B6-A0I2	Breast Invasive Carcinoma (TCGA, PanCancer Atlas)	1	Deep Deletion
TCGA-B6-A0RM	Breast Invasive Carcinoma (TCGA, PanCancer Atlas)	1	Deep Deletion
TCGA-B6-A0RS	Breast Invasive Carcinoma (TCGA, PanCancer Atlas)	1	Deep Deletion
TCGA-BH-A0BT	Breast Invasive Carcinoma (TCGA, PanCancer Atlas)	1	Deep Deletion
TCGA-BH-A0HU	Breast Invasive Carcinoma (TCGA, PanCancer Atlas)	1	Deep Deletion
TCGA-BH-A0WA	Breast Invasive Carcinoma (TCGA, PanCancer Atlas)	1	Deep Deletion
TCGA-BH-A1FB	Breast Invasive Carcinoma (TCGA, PanCancer Atlas)	1	Deep Deletion
TCGA-BH-A5J0	Breast Invasive Carcinoma (TCGA, PanCancer Atlas)	1	Deep Deletion
TCGA-BH-A18H	Breast Invasive Carcinoma (TCGA, PanCancer Atlas)	1	Deep Deletion
TCGA-D8-A1X6	Breast Invasive Carcinoma (TCGA, PanCancer Atlas)	1	Deep Deletion
TCGA-D8-A1XL	Breast Invasive Carcinoma (TCGA, PanCancer Atlas)	1	Deep Deletion
TCGA-D8-A147	Breast Invasive Carcinoma (TCGA, PanCancer Atlas)	1	Deep Deletion
TCGA-E2-A1B0	Breast Invasive Carcinoma (TCGA, PanCancer Atlas)	1	Deep Deletion
TCGA-E2-A1IN	Breast Invasive Carcinoma (TCGA, PanCancer Atlas)	1	Deep Deletion
TCGA-E2-A1LH	Breast Invasive Carcinoma (TCGA, PanCancer Atlas)	1	Deep Deletion
TCGA-E2-A9RU	Breast Invasive Carcinoma (TCGA, PanCancer Atlas)	1	Deep Deletion
TCGA-E2-A14N	Breast Invasive Carcinoma (TCGA, PanCancer Atlas)	1	Deep Deletion
TCGA-E2-A14X	Breast Invasive Carcinoma (TCGA, PanCancer Atlas)	1	Deep Deletion
TCGA-E2-A15J	Breast Invasive Carcinoma (TCGA, PanCancer Atlas)	1	Deep Deletion
TCGA-E2-A15M	Breast Invasive Carcinoma (TCGA, PanCancer Atlas)	1	Deep Deletion
TCGA-E2-A109	Breast Invasive Carcinoma (TCGA, PanCancer Atlas)	1	Deep Deletion
TCGA-E2-A574	Breast Invasive Carcinoma (TCGA, PanCancer Atlas)	1	Deep Deletion
TCGA-E9-A1N9	Breast Invasive Carcinoma (TCGA, PanCancer Atlas)	1	Deep Deletion
TCGA-E9-A1RF	Breast Invasive Carcinoma (TCGA, PanCancer Atlas)	1	Deep Deletion
TCGA-EW-A1OZ	Breast Invasive Carcinoma (TCGA, PanCancer Atlas)	1	Deep Deletion
TCGA-EW-A1P4	Breast Invasive Carcinoma (TCGA, PanCancer Atlas)	1	Deep Deletion
TCGA-LL-A7T0	Breast Invasive Carcinoma (TCGA, PanCancer Atlas)	1	Deep Deletion
TCGA-OL-A66H	Breast Invasive Carcinoma (TCGA, PanCancer Atlas)	1	Deep Deletion
TCGA-3C-AAAU	Breast Invasive Carcinoma (TCGA, PanCancer Atlas)	1
TCGA-3C-AALI	Breast Invasive Carcinoma (TCGA, PanCancer Atlas)	1
TCGA-3C-AALJ	Breast Invasive Carcinoma (TCGA, PanCancer Atlas)	1
TCGA-3C-AALK	Breast Invasive Carcinoma (TCGA, PanCancer Atlas)	1
TCGA-4H-AAAK	Breast Invasive Carcinoma (TCGA, PanCancer Atlas)	1
TCGA-5L-AAT0	Breast Invasive Carcinoma (TCGA, PanCancer Atlas)	1
TCGA-5T-A9QA	Breast Invasive Carcinoma (TCGA, PanCancer Atlas)	1
TCGA-A1-A0SB	Breast Invasive Carcinoma (TCGA, PanCancer Atlas)	1
TCGA-A1-A0SD	Breast Invasive Carcinoma (TCGA, PanCancer Atlas)	1
TCGA-A1-A0SE	Breast Invasive Carcinoma (TCGA, PanCancer Atlas)	1
TCGA-A1-A0SF	Breast Invasive Carcinoma (TCGA, PanCancer Atlas)	1
TCGA-A1-A0SH	Breast Invasive Carcinoma (TCGA, PanCancer Atlas)	1
TCGA-A1-A0SI	Breast Invasive Carcinoma (TCGA, PanCancer Atlas)	1
TCGA-A1-A0SJ	Breast Invasive Carcinoma (TCGA, PanCancer Atlas)	1
TCGA-A1-A0SK	Breast Invasive Carcinoma (TCGA, PanCancer Atlas)	1
TCGA-A1-A0SM	Breast Invasive Carcinoma (TCGA, PanCancer Atlas)	1
TCGA-A1-A0SN	Breast Invasive Carcinoma (TCGA, PanCancer Atlas)	1
TCGA-A1-A0SO	Breast Invasive Carcinoma (TCGA, PanCancer Atlas)	1
TCGA-A1-A0SP	Breast Invasive Carcinoma (TCGA, PanCancer Atlas)	1
TCGA-A1-A0SQ	Breast Invasive Carcinoma (TCGA, PanCancer Atlas)	1
TCGA-A2-A0CK	Breast Invasive Carcinoma (TCGA, PanCancer Atlas)	1
TCGA-A2-A0CL	Breast Invasive Carcinoma (TCGA, PanCancer Atlas)	1
TCGA-A2-A0CM	Breast Invasive Carcinoma (TCGA, PanCancer Atlas)	1
TCGA-A2-A0CO	Breast Invasive Carcinoma (TCGA, PanCancer Atlas)	1
TCGA-A2-A0CP	Breast Invasive Carcinoma (TCGA, PanCancer Atlas)	1
TCGA-A2-A0CQ	Breast Invasive Carcinoma (TCGA, PanCancer Atlas)	1
TCGA-A2-A0CR	Breast Invasive Carcinoma (TCGA, PanCancer Atlas)	1
TCGA-A2-A0CS	Breast Invasive Carcinoma (TCGA, PanCancer Atlas)	1
TCGA-A2-A0CT	Breast Invasive Carcinoma (TCGA, PanCancer Atlas)	1
TCGA-A2-A0CU	Breast Invasive Carcinoma (TCGA, PanCancer Atlas)	1
TCGA-A2-A0CV	Breast Invasive Carcinoma (TCGA, PanCancer Atlas)	1
TCGA-A2-A0CW	Breast Invasive Carcinoma (TCGA, PanCancer Atlas)	1
TCGA-A2-A0CX	Breast Invasive Carcinoma (TCGA, PanCancer Atlas)	1
TCGA-A2-A0D0	Breast Invasive Carcinoma (TCGA, PanCancer Atlas)	1
TCGA-A2-A0D1	Breast Invasive Carcinoma (TCGA, PanCancer Atlas)	1
TCGA-A2-A0D2	Breast Invasive Carcinoma (TCGA, PanCancer Atlas)	1
TCGA-A2-A0D3	Breast Invasive Carcinoma (TCGA, PanCancer Atlas)	1
TCGA-A2-A0D4	Breast Invasive Carcinoma (TCGA, PanCancer Atlas)	1
TCGA-A2-A0EM	Breast Invasive Carcinoma (TCGA, PanCancer Atlas)	1
TCGA-A2-A0EN	Breast Invasive Carcinoma (TCGA, PanCancer Atlas)	1
TCGA-A2-A0EO	Breast Invasive Carcinoma (TCGA, PanCancer Atlas)	1
TCGA-A2-A0EP	Breast Invasive Carcinoma (TCGA, PanCancer Atlas)	1
TCGA-A2-A0EQ	Breast Invasive Carcinoma (TCGA, PanCancer Atlas)	1
TCGA-A2-A0ER	Breast Invasive Carcinoma (TCGA, PanCancer Atlas)	1
TCGA-A2-A0ES	Breast Invasive Carcinoma (TCGA, PanCancer Atlas)	1
TCGA-A2-A0ET	Breast Invasive Carcinoma (TCGA, PanCancer Atlas)	1
TCGA-A2-A0EU	Breast Invasive Carcinoma (TCGA, PanCancer Atlas)	1
TCGA-A2-A0EV	Breast Invasive Carcinoma (TCGA, PanCancer Atlas)	1
TCGA-A2-A0EW	Breast Invasive Carcinoma (TCGA, PanCancer Atlas)	1
TCGA-A2-A0EX	Breast Invasive Carcinoma (TCGA, PanCancer Atlas)	1
TCGA-A2-A0EY	Breast Invasive Carcinoma (TCGA, PanCancer Atlas)	1
TCGA-A2-A0ST	Breast Invasive Carcinoma (TCGA, PanCancer Atlas)	1
TCGA-A2-A0SU	Breast Invasive Carcinoma (TCGA, PanCancer Atlas)	1
TCGA-A2-A0SV	Breast Invasive Carcinoma (TCGA, PanCancer Atlas)	1
TCGA-A2-A0SW	Breast Invasive Carcinoma (TCGA, PanCancer Atlas)	1
TCGA-A2-A0SX	Breast Invasive Carcinoma (TCGA, PanCancer Atlas)	1
TCGA-A2-A0SY	Breast Invasive Carcinoma (TCGA, PanCancer Atlas)	1
TCGA-A2-A0T0	Breast Invasive Carcinoma (TCGA, PanCancer Atlas)	1
TCGA-A2-A0T1	Breast Invasive Carcinoma (TCGA, PanCancer Atlas)	1
TCGA-A2-A0T2	Breast Invasive Carcinoma (TCGA, PanCancer Atlas)	1
TCGA-A2-A0T3	Breast Invasive Carcinoma (TCGA, PanCancer Atlas)	1
TCGA-A2-A0T4	Breast Invasive Carcinoma (TCGA, PanCancer Atlas)	1
TCGA-A2-A0T5	Breast Invasive Carcinoma (TCGA, PanCancer Atlas)	1
TCGA-A2-A0T6	Breast Invasive Carcinoma (TCGA, PanCancer Atlas)	1
TCGA-A2-A0T7	Breast Invasive Carcinoma (TCGA, PanCancer Atlas)	1
TCGA-A2-A0YC	Breast Invasive Carcinoma (TCGA, PanCancer Atlas)	1
TCGA-A2-A0YD	Breast Invasive Carcinoma (TCGA, PanCancer Atlas)	1
TCGA-A2-A0YE	Breast Invasive Carcinoma (TCGA, PanCancer Atlas)	1
TCGA-A2-A0YF	Breast Invasive Carcinoma (TCGA, PanCancer Atlas)	1
TCGA-A2-A0YG	Breast Invasive Carcinoma (TCGA, PanCancer Atlas)	1
TCGA-A2-A0YH	Breast Invasive Carcinoma (TCGA, PanCancer Atlas)	1
TCGA-A2-A0YI	Breast Invasive Carcinoma (TCGA, PanCancer Atlas)	1
TCGA-A2-A0YJ	Breast Invasive Carcinoma (TCGA, PanCancer Atlas)	1
TCGA-A2-A0YK	Breast Invasive Carcinoma (TCGA, PanCancer Atlas)	1
TCGA-A2-A0YL	Breast Invasive Carcinoma (TCGA, PanCancer Atlas)	1
TCGA-A2-A0YM	Breast Invasive Carcinoma (TCGA, PanCancer Atlas)	1
TCGA-A2-A0YT	Breast Invasive Carcinoma (TCGA, PanCancer Atlas)	1
TCGA-A2-A1FV	Breast Invasive Carcinoma (TCGA, PanCancer Atlas)	1
TCGA-A2-A1FW	Breast Invasive Carcinoma (TCGA, PanCancer Atlas)	1
TCGA-A2-A1FX	Breast Invasive Carcinoma (TCGA, PanCancer Atlas)	1
TCGA-A2-A1FZ	Breast Invasive Carcinoma (TCGA, PanCancer Atlas)	1
TCGA-A2-A1G0	Breast Invasive Carcinoma (TCGA, PanCancer Atlas)	1
TCGA-A2-A1G1	Breast Invasive Carcinoma (TCGA, PanCancer Atlas)	1
TCGA-A2-A1G4	Breast Invasive Carcinoma (TCGA, PanCancer Atlas)	1
TCGA-A2-A1G6	Breast Invasive Carcinoma (TCGA, PanCancer Atlas)	1
TCGA-A2-A3KC	Breast Invasive Carcinoma (TCGA, PanCancer Atlas)	1
TCGA-A2-A3KD	Breast Invasive Carcinoma (TCGA, PanCancer Atlas)	1
TCGA-A2-A3XS	Breast Invasive Carcinoma (TCGA, PanCancer Atlas)	1
TCGA-A2-A3XT	Breast Invasive Carcinoma (TCGA, PanCancer Atlas)	1
TCGA-A2-A3XU	Breast Invasive Carcinoma (TCGA, PanCancer Atlas)	1
TCGA-A2-A3XV	Breast Invasive Carcinoma (TCGA, PanCancer Atlas)	1
TCGA-A2-A3XW	Breast Invasive Carcinoma (TCGA, PanCancer Atlas)	1
TCGA-A2-A3XX	Breast Invasive Carcinoma (TCGA, PanCancer Atlas)	1
TCGA-A2-A3XZ	Breast Invasive Carcinoma (TCGA, PanCancer Atlas)	1
TCGA-A2-A3Y0	Breast Invasive Carcinoma (TCGA, PanCancer Atlas)	1
TCGA-A2-A04N	Breast Invasive Carcinoma (TCGA, PanCancer Atlas)	1
TCGA-A2-A04P	Breast Invasive Carcinoma (TCGA, PanCancer Atlas)	1
TCGA-A2-A04Q	Breast Invasive Carcinoma (TCGA, PanCancer Atlas)	1
TCGA-A2-A04R	Breast Invasive Carcinoma (TCGA, PanCancer Atlas)	1
TCGA-A2-A4RW	Breast Invasive Carcinoma (TCGA, PanCancer Atlas)	1
TCGA-A2-A4RX	Breast Invasive Carcinoma (TCGA, PanCancer Atlas)	1
TCGA-A2-A4RY	Breast Invasive Carcinoma (TCGA, PanCancer Atlas)	1
TCGA-A2-A4S0	Breast Invasive Carcinoma (TCGA, PanCancer Atlas)	1
TCGA-A2-A4S1	Breast Invasive Carcinoma (TCGA, PanCancer Atlas)	1
TCGA-A2-A4S2	Breast Invasive Carcinoma (TCGA, PanCancer Atlas)	1
TCGA-A2-A4S3	Breast Invasive Carcinoma (TCGA, PanCancer Atlas)	1
TCGA-A2-A04T	Breast Invasive Carcinoma (TCGA, PanCancer Atlas)	1
TCGA-A2-A04U	Breast Invasive Carcinoma (TCGA, PanCancer Atlas)	1
TCGA-A2-A04V	Breast Invasive Carcinoma (TCGA, PanCancer Atlas)	1
TCGA-A2-A04W	Breast Invasive Carcinoma (TCGA, PanCancer Atlas)	1
TCGA-A2-A04X	Breast Invasive Carcinoma (TCGA, PanCancer Atlas)	1
TCGA-A2-A04Y	Breast Invasive Carcinoma (TCGA, PanCancer Atlas)	1
TCGA-A2-A25A	Breast Invasive Carcinoma (TCGA, PanCancer Atlas)	1
TCGA-A2-A25B	Breast Invasive Carcinoma (TCGA, PanCancer Atlas)	1
TCGA-A2-A25C	Breast Invasive Carcinoma (TCGA, PanCancer Atlas)	1
TCGA-A2-A25D	Breast Invasive Carcinoma (TCGA, PanCancer Atlas)	1
TCGA-A2-A25E	Breast Invasive Carcinoma (TCGA, PanCancer Atlas)	1
TCGA-A2-A25F	Breast Invasive Carcinoma (TCGA, PanCancer Atlas)	1
TCGA-A2-A259	Breast Invasive Carcinoma (TCGA, PanCancer Atlas)	1
TCGA-A7-A0CD	Breast Invasive Carcinoma (TCGA, PanCancer Atlas)	1
TCGA-A7-A0CE	Breast Invasive Carcinoma (TCGA, PanCancer Atlas)	1
TCGA-A7-A0CG	Breast Invasive Carcinoma (TCGA, PanCancer Atlas)	1
TCGA-A7-A0CH	Breast Invasive Carcinoma (TCGA, PanCancer Atlas)	1
TCGA-A7-A0CJ	Breast Invasive Carcinoma (TCGA, PanCancer Atlas)	1
TCGA-A7-A0D9	Breast Invasive Carcinoma (TCGA, PanCancer Atlas)	1
TCGA-A7-A0DA	Breast Invasive Carcinoma (TCGA, PanCancer Atlas)	1
TCGA-A7-A0DB	Breast Invasive Carcinoma (TCGA, PanCancer Atlas)	1
TCGA-A7-A0DC	Breast Invasive Carcinoma (TCGA, PanCancer Atlas)	1
TCGA-A7-A2KD	Breast Invasive Carcinoma (TCGA, PanCancer Atlas)	1
TCGA-A7-A3IY	Breast Invasive Carcinoma (TCGA, PanCancer Atlas)	1
TCGA-A7-A3IZ	Breast Invasive Carcinoma (TCGA, PanCancer Atlas)	1
TCGA-A7-A3J0	Breast Invasive Carcinoma (TCGA, PanCancer Atlas)	1
TCGA-A7-A3J1	Breast Invasive Carcinoma (TCGA, PanCancer Atlas)	1
TCGA-A7-A3RF	Breast Invasive Carcinoma (TCGA, PanCancer Atlas)	1
TCGA-A7-A4SA	Breast Invasive Carcinoma (TCGA, PanCancer Atlas)	1
TCGA-A7-A4SB	Breast Invasive Carcinoma (TCGA, PanCancer Atlas)	1
TCGA-A7-A4SD	Breast Invasive Carcinoma (TCGA, PanCancer Atlas)	1
TCGA-A7-A4SE	Breast Invasive Carcinoma (TCGA, PanCancer Atlas)	1
TCGA-A7-A4SF	Breast Invasive Carcinoma (TCGA, PanCancer Atlas)	1
TCGA-A7-A5ZV	Breast Invasive Carcinoma (TCGA, PanCancer Atlas)	1
TCGA-A7-A5ZW	Breast Invasive Carcinoma (TCGA, PanCancer Atlas)	1
TCGA-A7-A5ZX	Breast Invasive Carcinoma (TCGA, PanCancer Atlas)	1
TCGA-A7-A6VV	Breast Invasive Carcinoma (TCGA, PanCancer Atlas)	1
TCGA-A7-A6VW	Breast Invasive Carcinoma (TCGA, PanCancer Atlas)	1
TCGA-A7-A6VX	Breast Invasive Carcinoma (TCGA, PanCancer Atlas)	1
TCGA-A7-A6VY	Breast Invasive Carcinoma (TCGA, PanCancer Atlas)	1
TCGA-A7-A13D	Breast Invasive Carcinoma (TCGA, PanCancer Atlas)	1
TCGA-A7-A13E	Breast Invasive Carcinoma (TCGA, PanCancer Atlas)	1
TCGA-A7-A13F	Breast Invasive Carcinoma (TCGA, PanCancer Atlas)	1
TCGA-A7-A13G	Breast Invasive Carcinoma (TCGA, PanCancer Atlas)	1
TCGA-A7-A13H	Breast Invasive Carcinoma (TCGA, PanCancer Atlas)	1
TCGA-A7-A26E	Breast Invasive Carcinoma (TCGA, PanCancer Atlas)	1
TCGA-A7-A26F	Breast Invasive Carcinoma (TCGA, PanCancer Atlas)	1
TCGA-A7-A26G	Breast Invasive Carcinoma (TCGA, PanCancer Atlas)	1
TCGA-A7-A26H	Breast Invasive Carcinoma (TCGA, PanCancer Atlas)	1
TCGA-A7-A26I	Breast Invasive Carcinoma (TCGA, PanCancer Atlas)	1
TCGA-A7-A26J	Breast Invasive Carcinoma (TCGA, PanCancer Atlas)	1
TCGA-A7-A56D	Breast Invasive Carcinoma (TCGA, PanCancer Atlas)	1
TCGA-A7-A425	Breast Invasive Carcinoma (TCGA, PanCancer Atlas)	1
TCGA-A7-A426	Breast Invasive Carcinoma (TCGA, PanCancer Atlas)	1
TCGA-A8-A0A1	Breast Invasive Carcinoma (TCGA, PanCancer Atlas)	1
TCGA-A8-A0A2	Breast Invasive Carcinoma (TCGA, PanCancer Atlas)	1
TCGA-A8-A0A4	Breast Invasive Carcinoma (TCGA, PanCancer Atlas)	1
TCGA-A8-A0A6	Breast Invasive Carcinoma (TCGA, PanCancer Atlas)	1
TCGA-A8-A0A7	Breast Invasive Carcinoma (TCGA, PanCancer Atlas)	1
TCGA-A8-A0A9	Breast Invasive Carcinoma (TCGA, PanCancer Atlas)	1
TCGA-A8-A0AB	Breast Invasive Carcinoma (TCGA, PanCancer Atlas)	1
TCGA-A8-A0AD	Breast Invasive Carcinoma (TCGA, PanCancer Atlas)	1
TCGA-A8-A06O	Breast Invasive Carcinoma (TCGA, PanCancer Atlas)	1
TCGA-A8-A06P	Breast Invasive Carcinoma (TCGA, PanCancer Atlas)	1
TCGA-A8-A06Q	Breast Invasive Carcinoma (TCGA, PanCancer Atlas)	1
TCGA-A8-A06T	Breast Invasive Carcinoma (TCGA, PanCancer Atlas)	1
TCGA-A8-A06U	Breast Invasive Carcinoma (TCGA, PanCancer Atlas)	1
TCGA-A8-A06X	Breast Invasive Carcinoma (TCGA, PanCancer Atlas)	1
TCGA-A8-A06Y	Breast Invasive Carcinoma (TCGA, PanCancer Atlas)	1
TCGA-A8-A06Z	Breast Invasive Carcinoma (TCGA, PanCancer Atlas)	1
TCGA-A8-A07B	Breast Invasive Carcinoma (TCGA, PanCancer Atlas)	1
TCGA-A8-A07E	Breast Invasive Carcinoma (TCGA, PanCancer Atlas)	1
TCGA-A8-A07F	Breast Invasive Carcinoma (TCGA, PanCancer Atlas)	1
TCGA-A8-A07G	Breast Invasive Carcinoma (TCGA, PanCancer Atlas)	1
TCGA-A8-A07I	Breast Invasive Carcinoma (TCGA, PanCancer Atlas)	1
TCGA-A8-A07J	Breast Invasive Carcinoma (TCGA, PanCancer Atlas)	1
TCGA-A8-A07L	Breast Invasive Carcinoma (TCGA, PanCancer Atlas)	1
TCGA-A8-A07O	Breast Invasive Carcinoma (TCGA, PanCancer Atlas)	1
TCGA-A8-A07P	Breast Invasive Carcinoma (TCGA, PanCancer Atlas)	1
TCGA-A8-A07R	Breast Invasive Carcinoma (TCGA, PanCancer Atlas)	1
TCGA-A8-A07S	Breast Invasive Carcinoma (TCGA, PanCancer Atlas)	1
TCGA-A8-A07U	Breast Invasive Carcinoma (TCGA, PanCancer Atlas)	1
TCGA-A8-A07W	Breast Invasive Carcinoma (TCGA, PanCancer Atlas)	1
TCGA-A8-A07Z	Breast Invasive Carcinoma (TCGA, PanCancer Atlas)	1
TCGA-A8-A08A	Breast Invasive Carcinoma (TCGA, PanCancer Atlas)	1
TCGA-A8-A08B	Breast Invasive Carcinoma (TCGA, PanCancer Atlas)	1
TCGA-A8-A08C	Breast Invasive Carcinoma (TCGA, PanCancer Atlas)	1
TCGA-A8-A08H	Breast Invasive Carcinoma (TCGA, PanCancer Atlas)	1
TCGA-A8-A08I	Breast Invasive Carcinoma (TCGA, PanCancer Atlas)	1
TCGA-A8-A08L	Breast Invasive Carcinoma (TCGA, PanCancer Atlas)	1
TCGA-A8-A08O	Breast Invasive Carcinoma (TCGA, PanCancer Atlas)	1
TCGA-A8-A08P	Breast Invasive Carcinoma (TCGA, PanCancer Atlas)	1
TCGA-A8-A08R	Breast Invasive Carcinoma (TCGA, PanCancer Atlas)	1
TCGA-A8-A08T	Breast Invasive Carcinoma (TCGA, PanCancer Atlas)	1
TCGA-A8-A08X	Breast Invasive Carcinoma (TCGA, PanCancer Atlas)	1
TCGA-A8-A08Z	Breast Invasive Carcinoma (TCGA, PanCancer Atlas)	1
TCGA-A8-A09A	Breast Invasive Carcinoma (TCGA, PanCancer Atlas)	1
TCGA-A8-A09B	Breast Invasive Carcinoma (TCGA, PanCancer Atlas)	1
TCGA-A8-A09C	Breast Invasive Carcinoma (TCGA, PanCancer Atlas)	1
TCGA-A8-A09D	Breast Invasive Carcinoma (TCGA, PanCancer Atlas)	1
TCGA-A8-A09G	Breast Invasive Carcinoma (TCGA, PanCancer Atlas)	1
TCGA-A8-A09I	Breast Invasive Carcinoma (TCGA, PanCancer Atlas)	1
TCGA-A8-A09M	Breast Invasive Carcinoma (TCGA, PanCancer Atlas)	1
TCGA-A8-A09N	Breast Invasive Carcinoma (TCGA, PanCancer Atlas)	1
TCGA-A8-A09Q	Breast Invasive Carcinoma (TCGA, PanCancer Atlas)	1
TCGA-A8-A09R	Breast Invasive Carcinoma (TCGA, PanCancer Atlas)	1
TCGA-A8-A09T	Breast Invasive Carcinoma (TCGA, PanCancer Atlas)	1
TCGA-A8-A09V	Breast Invasive Carcinoma (TCGA, PanCancer Atlas)	1
TCGA-A8-A09W	Breast Invasive Carcinoma (TCGA, PanCancer Atlas)	1
TCGA-A8-A09X	Breast Invasive Carcinoma (TCGA, PanCancer Atlas)	1
TCGA-A8-A09Z	Breast Invasive Carcinoma (TCGA, PanCancer Atlas)	1
TCGA-A8-A075	Breast Invasive Carcinoma (TCGA, PanCancer Atlas)	1
TCGA-A8-A076	Breast Invasive Carcinoma (TCGA, PanCancer Atlas)	1
TCGA-A8-A079	Breast Invasive Carcinoma (TCGA, PanCancer Atlas)	1
TCGA-A8-A081	Breast Invasive Carcinoma (TCGA, PanCancer Atlas)	1
TCGA-A8-A082	Breast Invasive Carcinoma (TCGA, PanCancer Atlas)	1
TCGA-A8-A083	Breast Invasive Carcinoma (TCGA, PanCancer Atlas)	1
TCGA-A8-A085	Breast Invasive Carcinoma (TCGA, PanCancer Atlas)	1
TCGA-A8-A086	Breast Invasive Carcinoma (TCGA, PanCancer Atlas)	1
TCGA-A8-A090	Breast Invasive Carcinoma (TCGA, PanCancer Atlas)	1
TCGA-A8-A091	Breast Invasive Carcinoma (TCGA, PanCancer Atlas)	1
TCGA-A8-A093	Breast Invasive Carcinoma (TCGA, PanCancer Atlas)	1
TCGA-A8-A094	Breast Invasive Carcinoma (TCGA, PanCancer Atlas)	1
TCGA-A8-A095	Breast Invasive Carcinoma (TCGA, PanCancer Atlas)	1
TCGA-A8-A096	Breast Invasive Carcinoma (TCGA, PanCancer Atlas)	1
TCGA-A8-A097	Breast Invasive Carcinoma (TCGA, PanCancer Atlas)	1
TCGA-A8-A099	Breast Invasive Carcinoma (TCGA, PanCancer Atlas)	1
TCGA-AC-A2B8	Breast Invasive Carcinoma (TCGA, PanCancer Atlas)	1
TCGA-AC-A2BK	Breast Invasive Carcinoma (TCGA, PanCancer Atlas)	1
TCGA-AC-A2BM	Breast Invasive Carcinoma (TCGA, PanCancer Atlas)	1
TCGA-AC-A2FB	Breast Invasive Carcinoma (TCGA, PanCancer Atlas)	1
TCGA-AC-A2FE	Breast Invasive Carcinoma (TCGA, PanCancer Atlas)	1
TCGA-AC-A2FF	Breast Invasive Carcinoma (TCGA, PanCancer Atlas)	1
TCGA-AC-A2FG	Breast Invasive Carcinoma (TCGA, PanCancer Atlas)	1
TCGA-AC-A2FK	Breast Invasive Carcinoma (TCGA, PanCancer Atlas)	1
TCGA-AC-A2FM	Breast Invasive Carcinoma (TCGA, PanCancer Atlas)	1
TCGA-AC-A2FO	Breast Invasive Carcinoma (TCGA, PanCancer Atlas)	1
TCGA-AC-A2QH	Breast Invasive Carcinoma (TCGA, PanCancer Atlas)	1
TCGA-AC-A2QI	Breast Invasive Carcinoma (TCGA, PanCancer Atlas)	1
TCGA-AC-A2QJ	Breast Invasive Carcinoma (TCGA, PanCancer Atlas)	1
TCGA-AC-A3BB	Breast Invasive Carcinoma (TCGA, PanCancer Atlas)	1
TCGA-AC-A3EH	Breast Invasive Carcinoma (TCGA, PanCancer Atlas)	1
TCGA-AC-A3HN	Breast Invasive Carcinoma (TCGA, PanCancer Atlas)	1
TCGA-AC-A3OD	Breast Invasive Carcinoma (TCGA, PanCancer Atlas)	1
TCGA-AC-A3QP	Breast Invasive Carcinoma (TCGA, PanCancer Atlas)	1
TCGA-AC-A3QQ	Breast Invasive Carcinoma (TCGA, PanCancer Atlas)	1
TCGA-AC-A3TM	Breast Invasive Carcinoma (TCGA, PanCancer Atlas)	1
TCGA-AC-A3TN	Breast Invasive Carcinoma (TCGA, PanCancer Atlas)	1
TCGA-AC-A3W5	Breast Invasive Carcinoma (TCGA, PanCancer Atlas)	1
TCGA-AC-A3W6	Breast Invasive Carcinoma (TCGA, PanCancer Atlas)	1
TCGA-AC-A3W7	Breast Invasive Carcinoma (TCGA, PanCancer Atlas)	1
TCGA-AC-A3YJ	Breast Invasive Carcinoma (TCGA, PanCancer Atlas)	1
TCGA-AC-A4ZE	Breast Invasive Carcinoma (TCGA, PanCancer Atlas)	1
TCGA-AC-A5EH	Breast Invasive Carcinoma (TCGA, PanCancer Atlas)	1
TCGA-AC-A5EI	Breast Invasive Carcinoma (TCGA, PanCancer Atlas)	1
TCGA-AC-A5XS	Breast Invasive Carcinoma (TCGA, PanCancer Atlas)	1
TCGA-AC-A5XU	Breast Invasive Carcinoma (TCGA, PanCancer Atlas)	1
TCGA-AC-A6IV	Breast Invasive Carcinoma (TCGA, PanCancer Atlas)	1
TCGA-AC-A6IW	Breast Invasive Carcinoma (TCGA, PanCancer Atlas)	1
TCGA-AC-A6IX	Breast Invasive Carcinoma (TCGA, PanCancer Atlas)	1
TCGA-AC-A6NO	Breast Invasive Carcinoma (TCGA, PanCancer Atlas)	1
TCGA-AC-A7VB	Breast Invasive Carcinoma (TCGA, PanCancer Atlas)	1
TCGA-AC-A7VC	Breast Invasive Carcinoma (TCGA, PanCancer Atlas)	1
TCGA-AC-A8OQ	Breast Invasive Carcinoma (TCGA, PanCancer Atlas)	1
TCGA-AC-A8OR	Breast Invasive Carcinoma (TCGA, PanCancer Atlas)	1
TCGA-AC-A8OS	Breast Invasive Carcinoma (TCGA, PanCancer Atlas)	1
TCGA-AC-A23C	Breast Invasive Carcinoma (TCGA, PanCancer Atlas)	1
TCGA-AC-A23E	Breast Invasive Carcinoma (TCGA, PanCancer Atlas)	1
TCGA-AC-A23G	Breast Invasive Carcinoma (TCGA, PanCancer Atlas)	1
TCGA-AC-A23H	Breast Invasive Carcinoma (TCGA, PanCancer Atlas)	1
TCGA-AC-A62V	Breast Invasive Carcinoma (TCGA, PanCancer Atlas)	1
TCGA-AC-A62X	Breast Invasive Carcinoma (TCGA, PanCancer Atlas)	1
TCGA-AC-A62Y	Breast Invasive Carcinoma (TCGA, PanCancer Atlas)	1
TCGA-AN-A0AK	Breast Invasive Carcinoma (TCGA, PanCancer Atlas)	1
TCGA-AN-A0AL	Breast Invasive Carcinoma (TCGA, PanCancer Atlas)	1
TCGA-AN-A0AM	Breast Invasive Carcinoma (TCGA, PanCancer Atlas)	1
TCGA-AN-A0AR	Breast Invasive Carcinoma (TCGA, PanCancer Atlas)	1
TCGA-AN-A0AS	Breast Invasive Carcinoma (TCGA, PanCancer Atlas)	1
TCGA-AN-A0AT	Breast Invasive Carcinoma (TCGA, PanCancer Atlas)	1
TCGA-AN-A0FD	Breast Invasive Carcinoma (TCGA, PanCancer Atlas)	1
TCGA-AN-A0FF	Breast Invasive Carcinoma (TCGA, PanCancer Atlas)	1
TCGA-AN-A0FJ	Breast Invasive Carcinoma (TCGA, PanCancer Atlas)	1
TCGA-AN-A0FK	Breast Invasive Carcinoma (TCGA, PanCancer Atlas)	1
TCGA-AN-A0FL	Breast Invasive Carcinoma (TCGA, PanCancer Atlas)	1
TCGA-AN-A0FN	Breast Invasive Carcinoma (TCGA, PanCancer Atlas)	1
TCGA-AN-A0FS	Breast Invasive Carcinoma (TCGA, PanCancer Atlas)	1
TCGA-AN-A0FT	Breast Invasive Carcinoma (TCGA, PanCancer Atlas)	1
TCGA-AN-A0FV	Breast Invasive Carcinoma (TCGA, PanCancer Atlas)	1
TCGA-AN-A0FW	Breast Invasive Carcinoma (TCGA, PanCancer Atlas)	1
TCGA-AN-A0FX	Breast Invasive Carcinoma (TCGA, PanCancer Atlas)	1
TCGA-AN-A0FZ	Breast Invasive Carcinoma (TCGA, PanCancer Atlas)	1
TCGA-AN-A0XL	Breast Invasive Carcinoma (TCGA, PanCancer Atlas)	1
TCGA-AN-A0XO	Breast Invasive Carcinoma (TCGA, PanCancer Atlas)	1
TCGA-AN-A0XP	Breast Invasive Carcinoma (TCGA, PanCancer Atlas)	1
TCGA-AN-A0XR	Breast Invasive Carcinoma (TCGA, PanCancer Atlas)	1
TCGA-AN-A0XS	Breast Invasive Carcinoma (TCGA, PanCancer Atlas)	1
TCGA-AN-A0XT	Breast Invasive Carcinoma (TCGA, PanCancer Atlas)	1
TCGA-AN-A0XU	Breast Invasive Carcinoma (TCGA, PanCancer Atlas)	1
TCGA-AN-A0XV	Breast Invasive Carcinoma (TCGA, PanCancer Atlas)	1
TCGA-AN-A0XW	Breast Invasive Carcinoma (TCGA, PanCancer Atlas)	1
TCGA-AN-A03X	Breast Invasive Carcinoma (TCGA, PanCancer Atlas)	1
TCGA-AN-A03Y	Breast Invasive Carcinoma (TCGA, PanCancer Atlas)	1
TCGA-AN-A04A	Breast Invasive Carcinoma (TCGA, PanCancer Atlas)	1
TCGA-AN-A04C	Breast Invasive Carcinoma (TCGA, PanCancer Atlas)	1
TCGA-AN-A04D	Breast Invasive Carcinoma (TCGA, PanCancer Atlas)	1
TCGA-AN-A041	Breast Invasive Carcinoma (TCGA, PanCancer Atlas)	1
TCGA-AN-A046	Breast Invasive Carcinoma (TCGA, PanCancer Atlas)	1
TCGA-AN-A049	Breast Invasive Carcinoma (TCGA, PanCancer Atlas)	1
TCGA-AO-A0J2	Breast Invasive Carcinoma (TCGA, PanCancer Atlas)	1
TCGA-AO-A0J3	Breast Invasive Carcinoma (TCGA, PanCancer Atlas)	1
TCGA-AO-A0J4	Breast Invasive Carcinoma (TCGA, PanCancer Atlas)	1
TCGA-AO-A0J5	Breast Invasive Carcinoma (TCGA, PanCancer Atlas)	1
TCGA-AO-A0J6	Breast Invasive Carcinoma (TCGA, PanCancer Atlas)	1
TCGA-AO-A0J7	Breast Invasive Carcinoma (TCGA, PanCancer Atlas)	1
TCGA-AO-A0J8	Breast Invasive Carcinoma (TCGA, PanCancer Atlas)	1
TCGA-AO-A0J9	Breast Invasive Carcinoma (TCGA, PanCancer Atlas)	1
TCGA-AO-A0JA	Breast Invasive Carcinoma (TCGA, PanCancer Atlas)	1
TCGA-AO-A0JB	Breast Invasive Carcinoma (TCGA, PanCancer Atlas)	1
TCGA-AO-A0JC	Breast Invasive Carcinoma (TCGA, PanCancer Atlas)	1
TCGA-AO-A0JD	Breast Invasive Carcinoma (TCGA, PanCancer Atlas)	1
TCGA-AO-A0JE	Breast Invasive Carcinoma (TCGA, PanCancer Atlas)	1
TCGA-AO-A0JF	Breast Invasive Carcinoma (TCGA, PanCancer Atlas)	1
TCGA-AO-A0JG	Breast Invasive Carcinoma (TCGA, PanCancer Atlas)	1
TCGA-AO-A0JI	Breast Invasive Carcinoma (TCGA, PanCancer Atlas)	1
TCGA-AO-A0JJ	Breast Invasive Carcinoma (TCGA, PanCancer Atlas)	1
TCGA-AO-A0JL	Breast Invasive Carcinoma (TCGA, PanCancer Atlas)	1
TCGA-AO-A0JM	Breast Invasive Carcinoma (TCGA, PanCancer Atlas)	1
TCGA-AO-A1KO	Breast Invasive Carcinoma (TCGA, PanCancer Atlas)	1
TCGA-AO-A1KP	Breast Invasive Carcinoma (TCGA, PanCancer Atlas)	1
TCGA-AO-A1KQ	Breast Invasive Carcinoma (TCGA, PanCancer Atlas)	1
TCGA-AO-A1KR	Breast Invasive Carcinoma (TCGA, PanCancer Atlas)	1
TCGA-AO-A1KS	Breast Invasive Carcinoma (TCGA, PanCancer Atlas)	1
TCGA-AO-A1KT	Breast Invasive Carcinoma (TCGA, PanCancer Atlas)	1
TCGA-AO-A03L	Breast Invasive Carcinoma (TCGA, PanCancer Atlas)	1
TCGA-AO-A03M	Breast Invasive Carcinoma (TCGA, PanCancer Atlas)	1
TCGA-AO-A03N	Breast Invasive Carcinoma (TCGA, PanCancer Atlas)	1
TCGA-AO-A03O	Breast Invasive Carcinoma (TCGA, PanCancer Atlas)	1
TCGA-AO-A03P	Breast Invasive Carcinoma (TCGA, PanCancer Atlas)	1
TCGA-AO-A03R	Breast Invasive Carcinoma (TCGA, PanCancer Atlas)	1
TCGA-AO-A03T	Breast Invasive Carcinoma (TCGA, PanCancer Atlas)	1
TCGA-AO-A03U	Breast Invasive Carcinoma (TCGA, PanCancer Atlas)	1
TCGA-AO-A03V	Breast Invasive Carcinoma (TCGA, PanCancer Atlas)	1
TCGA-AO-A12A	Breast Invasive Carcinoma (TCGA, PanCancer Atlas)	1
TCGA-AO-A12B	Breast Invasive Carcinoma (TCGA, PanCancer Atlas)	1
TCGA-AO-A12D	Breast Invasive Carcinoma (TCGA, PanCancer Atlas)	1
TCGA-AO-A12E	Breast Invasive Carcinoma (TCGA, PanCancer Atlas)	1
TCGA-AO-A12F	Breast Invasive Carcinoma (TCGA, PanCancer Atlas)	1
TCGA-AO-A12G	Breast Invasive Carcinoma (TCGA, PanCancer Atlas)	1
TCGA-AO-A12H	Breast Invasive Carcinoma (TCGA, PanCancer Atlas)	1
TCGA-AO-A124	Breast Invasive Carcinoma (TCGA, PanCancer Atlas)	1
TCGA-AO-A125	Breast Invasive Carcinoma (TCGA, PanCancer Atlas)	1
TCGA-AO-A126	Breast Invasive Carcinoma (TCGA, PanCancer Atlas)	1
TCGA-AO-A128	Breast Invasive Carcinoma (TCGA, PanCancer Atlas)	1
TCGA-AO-A129	Breast Invasive Carcinoma (TCGA, PanCancer Atlas)	1
TCGA-AQ-A0Y5	Breast Invasive Carcinoma (TCGA, PanCancer Atlas)	1
TCGA-AQ-A1H2	Breast Invasive Carcinoma (TCGA, PanCancer Atlas)	1
TCGA-AQ-A1H3	Breast Invasive Carcinoma (TCGA, PanCancer Atlas)	1
TCGA-AQ-A04J	Breast Invasive Carcinoma (TCGA, PanCancer Atlas)	1
TCGA-AQ-A7U7	Breast Invasive Carcinoma (TCGA, PanCancer Atlas)	1
TCGA-AQ-A54N	Breast Invasive Carcinoma (TCGA, PanCancer Atlas)	1
TCGA-AQ-A54O	Breast Invasive Carcinoma (TCGA, PanCancer Atlas)	1
TCGA-AR-A0TP	Breast Invasive Carcinoma (TCGA, PanCancer Atlas)	1
TCGA-AR-A0TQ	Breast Invasive Carcinoma (TCGA, PanCancer Atlas)	1
TCGA-AR-A0TR	Breast Invasive Carcinoma (TCGA, PanCancer Atlas)	1
TCGA-AR-A0TV	Breast Invasive Carcinoma (TCGA, PanCancer Atlas)	1
TCGA-AR-A0TW	Breast Invasive Carcinoma (TCGA, PanCancer Atlas)	1
TCGA-AR-A0TX	Breast Invasive Carcinoma (TCGA, PanCancer Atlas)	1
TCGA-AR-A0TY	Breast Invasive Carcinoma (TCGA, PanCancer Atlas)	1
TCGA-AR-A0TZ	Breast Invasive Carcinoma (TCGA, PanCancer Atlas)	1
TCGA-AR-A0U0	Breast Invasive Carcinoma (TCGA, PanCancer Atlas)	1
TCGA-AR-A0U1	Breast Invasive Carcinoma (TCGA, PanCancer Atlas)	1
TCGA-AR-A0U2	Breast Invasive Carcinoma (TCGA, PanCancer Atlas)	1
TCGA-AR-A0U3	Breast Invasive Carcinoma (TCGA, PanCancer Atlas)	1
TCGA-AR-A0U4	Breast Invasive Carcinoma (TCGA, PanCancer Atlas)	1
TCGA-AR-A1AH	Breast Invasive Carcinoma (TCGA, PanCancer Atlas)	1
TCGA-AR-A1AI	Breast Invasive Carcinoma (TCGA, PanCancer Atlas)	1
TCGA-AR-A1AK	Breast Invasive Carcinoma (TCGA, PanCancer Atlas)	1
TCGA-AR-A1AL	Breast Invasive Carcinoma (TCGA, PanCancer Atlas)	1
TCGA-AR-A1AM	Breast Invasive Carcinoma (TCGA, PanCancer Atlas)	1
TCGA-AR-A1AN	Breast Invasive Carcinoma (TCGA, PanCancer Atlas)	1
TCGA-AR-A1AO	Breast Invasive Carcinoma (TCGA, PanCancer Atlas)	1
TCGA-AR-A1AP	Breast Invasive Carcinoma (TCGA, PanCancer Atlas)	1
TCGA-AR-A1AQ	Breast Invasive Carcinoma (TCGA, PanCancer Atlas)	1
TCGA-AR-A1AR	Breast Invasive Carcinoma (TCGA, PanCancer Atlas)	1
TCGA-AR-A1AS	Breast Invasive Carcinoma (TCGA, PanCancer Atlas)	1
TCGA-AR-A1AU	Breast Invasive Carcinoma (TCGA, PanCancer Atlas)	1
TCGA-AR-A1AV	Breast Invasive Carcinoma (TCGA, PanCancer Atlas)	1
TCGA-AR-A1AW	Breast Invasive Carcinoma (TCGA, PanCancer Atlas)	1
TCGA-AR-A1AX	Breast Invasive Carcinoma (TCGA, PanCancer Atlas)	1
TCGA-AR-A1AY	Breast Invasive Carcinoma (TCGA, PanCancer Atlas)	1
TCGA-AR-A2LE	Breast Invasive Carcinoma (TCGA, PanCancer Atlas)	1
TCGA-AR-A2LH	Breast Invasive Carcinoma (TCGA, PanCancer Atlas)	1
TCGA-AR-A2LJ	Breast Invasive Carcinoma (TCGA, PanCancer Atlas)	1
TCGA-AR-A2LK	Breast Invasive Carcinoma (TCGA, PanCancer Atlas)	1
TCGA-AR-A2LM	Breast Invasive Carcinoma (TCGA, PanCancer Atlas)	1
TCGA-AR-A2LN	Breast Invasive Carcinoma (TCGA, PanCancer Atlas)	1
TCGA-AR-A2LO	Breast Invasive Carcinoma (TCGA, PanCancer Atlas)	1
TCGA-AR-A2LQ	Breast Invasive Carcinoma (TCGA, PanCancer Atlas)	1
TCGA-AR-A5QM	Breast Invasive Carcinoma (TCGA, PanCancer Atlas)	1
TCGA-AR-A5QN	Breast Invasive Carcinoma (TCGA, PanCancer Atlas)	1
TCGA-AR-A5QP	Breast Invasive Carcinoma (TCGA, PanCancer Atlas)	1
TCGA-AR-A5QQ	Breast Invasive Carcinoma (TCGA, PanCancer Atlas)	1
TCGA-AR-A24K	Breast Invasive Carcinoma (TCGA, PanCancer Atlas)	1
TCGA-AR-A24L	Breast Invasive Carcinoma (TCGA, PanCancer Atlas)	1
TCGA-AR-A24M	Breast Invasive Carcinoma (TCGA, PanCancer Atlas)	1
TCGA-AR-A24N	Breast Invasive Carcinoma (TCGA, PanCancer Atlas)	1
TCGA-AR-A24O	Breast Invasive Carcinoma (TCGA, PanCancer Atlas)	1
TCGA-AR-A24P	Breast Invasive Carcinoma (TCGA, PanCancer Atlas)	1
TCGA-AR-A24Q	Breast Invasive Carcinoma (TCGA, PanCancer Atlas)	1
TCGA-AR-A24R	Breast Invasive Carcinoma (TCGA, PanCancer Atlas)	1
TCGA-AR-A24T	Breast Invasive Carcinoma (TCGA, PanCancer Atlas)	1
TCGA-AR-A24U	Breast Invasive Carcinoma (TCGA, PanCancer Atlas)	1
TCGA-AR-A24V	Breast Invasive Carcinoma (TCGA, PanCancer Atlas)	1
TCGA-AR-A24W	Breast Invasive Carcinoma (TCGA, PanCancer Atlas)	1
TCGA-AR-A24X	Breast Invasive Carcinoma (TCGA, PanCancer Atlas)	1
TCGA-AR-A24Z	Breast Invasive Carcinoma (TCGA, PanCancer Atlas)	1
TCGA-AR-A250	Breast Invasive Carcinoma (TCGA, PanCancer Atlas)	1
TCGA-AR-A251	Breast Invasive Carcinoma (TCGA, PanCancer Atlas)	1
TCGA-AR-A252	Breast Invasive Carcinoma (TCGA, PanCancer Atlas)	1
TCGA-AR-A254	Breast Invasive Carcinoma (TCGA, PanCancer Atlas)	1
TCGA-AR-A256	Breast Invasive Carcinoma (TCGA, PanCancer Atlas)	1
TCGA-B6-A0I1	Breast Invasive Carcinoma (TCGA, PanCancer Atlas)	1
TCGA-B6-A0I5	Breast Invasive Carcinoma (TCGA, PanCancer Atlas)	1
TCGA-B6-A0I9	Breast Invasive Carcinoma (TCGA, PanCancer Atlas)	1
TCGA-B6-A0IA	Breast Invasive Carcinoma (TCGA, PanCancer Atlas)	1
TCGA-B6-A0IB	Breast Invasive Carcinoma (TCGA, PanCancer Atlas)	1
TCGA-B6-A0IC	Breast Invasive Carcinoma (TCGA, PanCancer Atlas)	1
TCGA-B6-A0IE	Breast Invasive Carcinoma (TCGA, PanCancer Atlas)	1
TCGA-B6-A0IG	Breast Invasive Carcinoma (TCGA, PanCancer Atlas)	1
TCGA-B6-A0IH	Breast Invasive Carcinoma (TCGA, PanCancer Atlas)	1
TCGA-B6-A0IJ	Breast Invasive Carcinoma (TCGA, PanCancer Atlas)	1
TCGA-B6-A0IK	Breast Invasive Carcinoma (TCGA, PanCancer Atlas)	1
TCGA-B6-A0IM	Breast Invasive Carcinoma (TCGA, PanCancer Atlas)	1
TCGA-B6-A0IN	Breast Invasive Carcinoma (TCGA, PanCancer Atlas)	1
TCGA-B6-A0IO	Breast Invasive Carcinoma (TCGA, PanCancer Atlas)	1
TCGA-B6-A0IP	Breast Invasive Carcinoma (TCGA, PanCancer Atlas)	1
TCGA-B6-A0IQ	Breast Invasive Carcinoma (TCGA, PanCancer Atlas)	1
TCGA-B6-A0RE	Breast Invasive Carcinoma (TCGA, PanCancer Atlas)	1
TCGA-B6-A0RG	Breast Invasive Carcinoma (TCGA, PanCancer Atlas)	1
TCGA-B6-A0RH	Breast Invasive Carcinoma (TCGA, PanCancer Atlas)	1
TCGA-B6-A0RI	Breast Invasive Carcinoma (TCGA, PanCancer Atlas)	1
TCGA-B6-A0RL	Breast Invasive Carcinoma (TCGA, PanCancer Atlas)	1
TCGA-B6-A0RN	Breast Invasive Carcinoma (TCGA, PanCancer Atlas)	1
TCGA-B6-A0RO	Breast Invasive Carcinoma (TCGA, PanCancer Atlas)	1
TCGA-B6-A0RP	Breast Invasive Carcinoma (TCGA, PanCancer Atlas)	1
TCGA-B6-A0RQ	Breast Invasive Carcinoma (TCGA, PanCancer Atlas)	1
TCGA-B6-A0RT	Breast Invasive Carcinoma (TCGA, PanCancer Atlas)	1
TCGA-B6-A0RU	Breast Invasive Carcinoma (TCGA, PanCancer Atlas)	1
TCGA-B6-A0RV	Breast Invasive Carcinoma (TCGA, PanCancer Atlas)	1
TCGA-B6-A0WS	Breast Invasive Carcinoma (TCGA, PanCancer Atlas)	1
TCGA-B6-A0WT	Breast Invasive Carcinoma (TCGA, PanCancer Atlas)	1
TCGA-B6-A0WV	Breast Invasive Carcinoma (TCGA, PanCancer Atlas)	1
TCGA-B6-A0WW	Breast Invasive Carcinoma (TCGA, PanCancer Atlas)	1
TCGA-B6-A0WX	Breast Invasive Carcinoma (TCGA, PanCancer Atlas)	1
TCGA-B6-A0WY	Breast Invasive Carcinoma (TCGA, PanCancer Atlas)	1
TCGA-B6-A0WZ	Breast Invasive Carcinoma (TCGA, PanCancer Atlas)	1
TCGA-B6-A0X0	Breast Invasive Carcinoma (TCGA, PanCancer Atlas)	1
TCGA-B6-A0X1	Breast Invasive Carcinoma (TCGA, PanCancer Atlas)	1
TCGA-B6-A0X4	Breast Invasive Carcinoma (TCGA, PanCancer Atlas)	1
TCGA-B6-A0X5	Breast Invasive Carcinoma (TCGA, PanCancer Atlas)	1
TCGA-B6-A0X7	Breast Invasive Carcinoma (TCGA, PanCancer Atlas)	1
TCGA-B6-A1KC	Breast Invasive Carcinoma (TCGA, PanCancer Atlas)	1
TCGA-B6-A1KF	Breast Invasive Carcinoma (TCGA, PanCancer Atlas)	1
TCGA-B6-A1KI	Breast Invasive Carcinoma (TCGA, PanCancer Atlas)	1
TCGA-B6-A1KN	Breast Invasive Carcinoma (TCGA, PanCancer Atlas)	1
TCGA-B6-A2IU	Breast Invasive Carcinoma (TCGA, PanCancer Atlas)	1
TCGA-B6-A3ZX	Breast Invasive Carcinoma (TCGA, PanCancer Atlas)	1
TCGA-B6-A40B	Breast Invasive Carcinoma (TCGA, PanCancer Atlas)	1
TCGA-B6-A40C	Breast Invasive Carcinoma (TCGA, PanCancer Atlas)	1
TCGA-B6-A400	Breast Invasive Carcinoma (TCGA, PanCancer Atlas)	1
TCGA-B6-A401	Breast Invasive Carcinoma (TCGA, PanCancer Atlas)	1
TCGA-B6-A402	Breast Invasive Carcinoma (TCGA, PanCancer Atlas)	1
TCGA-B6-A408	Breast Invasive Carcinoma (TCGA, PanCancer Atlas)	1
TCGA-B6-A409	Breast Invasive Carcinoma (TCGA, PanCancer Atlas)	1
TCGA-BH-A0AU	Breast Invasive Carcinoma (TCGA, PanCancer Atlas)	1
TCGA-BH-A0AV	Breast Invasive Carcinoma (TCGA, PanCancer Atlas)	1
TCGA-BH-A0AW	Breast Invasive Carcinoma (TCGA, PanCancer Atlas)	1
TCGA-BH-A0AY	Breast Invasive Carcinoma (TCGA, PanCancer Atlas)	1
TCGA-BH-A0AZ	Breast Invasive Carcinoma (TCGA, PanCancer Atlas)	1
TCGA-BH-A0B0	Breast Invasive Carcinoma (TCGA, PanCancer Atlas)	1
TCGA-BH-A0B2	Breast Invasive Carcinoma (TCGA, PanCancer Atlas)	1
TCGA-BH-A0B3	Breast Invasive Carcinoma (TCGA, PanCancer Atlas)	1
TCGA-BH-A0B4	Breast Invasive Carcinoma (TCGA, PanCancer Atlas)	1
TCGA-BH-A0B5	Breast Invasive Carcinoma (TCGA, PanCancer Atlas)	1
TCGA-BH-A0B7	Breast Invasive Carcinoma (TCGA, PanCancer Atlas)	1
TCGA-BH-A0B9	Breast Invasive Carcinoma (TCGA, PanCancer Atlas)	1
TCGA-BH-A0BA	Breast Invasive Carcinoma (TCGA, PanCancer Atlas)	1
TCGA-BH-A0BC	Breast Invasive Carcinoma (TCGA, PanCancer Atlas)	1
TCGA-BH-A0BD	Breast Invasive Carcinoma (TCGA, PanCancer Atlas)	1
TCGA-BH-A0BF	Breast Invasive Carcinoma (TCGA, PanCancer Atlas)	1
TCGA-BH-A0BG	Breast Invasive Carcinoma (TCGA, PanCancer Atlas)	1
TCGA-BH-A0BJ	Breast Invasive Carcinoma (TCGA, PanCancer Atlas)	1
TCGA-BH-A0BL	Breast Invasive Carcinoma (TCGA, PanCancer Atlas)	1
TCGA-BH-A0BM	Breast Invasive Carcinoma (TCGA, PanCancer Atlas)	1
TCGA-BH-A0BO	Breast Invasive Carcinoma (TCGA, PanCancer Atlas)	1
TCGA-BH-A0BP	Breast Invasive Carcinoma (TCGA, PanCancer Atlas)	1
TCGA-BH-A0BQ	Breast Invasive Carcinoma (TCGA, PanCancer Atlas)	1
TCGA-BH-A0BR	Breast Invasive Carcinoma (TCGA, PanCancer Atlas)	1
TCGA-BH-A0BS	Breast Invasive Carcinoma (TCGA, PanCancer Atlas)	1
TCGA-BH-A0BV	Breast Invasive Carcinoma (TCGA, PanCancer Atlas)	1
TCGA-BH-A0BW	Breast Invasive Carcinoma (TCGA, PanCancer Atlas)	1
TCGA-BH-A0BZ	Breast Invasive Carcinoma (TCGA, PanCancer Atlas)	1
TCGA-BH-A0C0	Breast Invasive Carcinoma (TCGA, PanCancer Atlas)	1
TCGA-BH-A0C1	Breast Invasive Carcinoma (TCGA, PanCancer Atlas)	1
TCGA-BH-A0C3	Breast Invasive Carcinoma (TCGA, PanCancer Atlas)	1
TCGA-BH-A0C7	Breast Invasive Carcinoma (TCGA, PanCancer Atlas)	1
TCGA-BH-A0DD	Breast Invasive Carcinoma (TCGA, PanCancer Atlas)	1
TCGA-BH-A0DE	Breast Invasive Carcinoma (TCGA, PanCancer Atlas)	1
TCGA-BH-A0DG	Breast Invasive Carcinoma (TCGA, PanCancer Atlas)	1
TCGA-BH-A0DH	Breast Invasive Carcinoma (TCGA, PanCancer Atlas)	1
TCGA-BH-A0DI	Breast Invasive Carcinoma (TCGA, PanCancer Atlas)	1
TCGA-BH-A0DK	Breast Invasive Carcinoma (TCGA, PanCancer Atlas)	1
TCGA-BH-A0DL	Breast Invasive Carcinoma (TCGA, PanCancer Atlas)	1
TCGA-BH-A0DO	Breast Invasive Carcinoma (TCGA, PanCancer Atlas)	1
TCGA-BH-A0DP	Breast Invasive Carcinoma (TCGA, PanCancer Atlas)	1
TCGA-BH-A0DQ	Breast Invasive Carcinoma (TCGA, PanCancer Atlas)	1
TCGA-BH-A0DS	Breast Invasive Carcinoma (TCGA, PanCancer Atlas)	1
TCGA-BH-A0DT	Breast Invasive Carcinoma (TCGA, PanCancer Atlas)	1
TCGA-BH-A0DV	Breast Invasive Carcinoma (TCGA, PanCancer Atlas)	1
TCGA-BH-A0DX	Breast Invasive Carcinoma (TCGA, PanCancer Atlas)	1
TCGA-BH-A0DZ	Breast Invasive Carcinoma (TCGA, PanCancer Atlas)	1
TCGA-BH-A0E0	Breast Invasive Carcinoma (TCGA, PanCancer Atlas)	1
TCGA-BH-A0E1	Breast Invasive Carcinoma (TCGA, PanCancer Atlas)	1
TCGA-BH-A0E2	Breast Invasive Carcinoma (TCGA, PanCancer Atlas)	1
TCGA-BH-A0E6	Breast Invasive Carcinoma (TCGA, PanCancer Atlas)	1
TCGA-BH-A0E7	Breast Invasive Carcinoma (TCGA, PanCancer Atlas)	1
TCGA-BH-A0E9	Breast Invasive Carcinoma (TCGA, PanCancer Atlas)	1
TCGA-BH-A0EA	Breast Invasive Carcinoma (TCGA, PanCancer Atlas)	1
TCGA-BH-A0EB	Breast Invasive Carcinoma (TCGA, PanCancer Atlas)	1
TCGA-BH-A0EE	Breast Invasive Carcinoma (TCGA, PanCancer Atlas)	1
TCGA-BH-A0EI	Breast Invasive Carcinoma (TCGA, PanCancer Atlas)	1
TCGA-BH-A0GY	Breast Invasive Carcinoma (TCGA, PanCancer Atlas)	1
TCGA-BH-A0GZ	Breast Invasive Carcinoma (TCGA, PanCancer Atlas)	1
TCGA-BH-A0H0	Breast Invasive Carcinoma (TCGA, PanCancer Atlas)	1
TCGA-BH-A0H3	Breast Invasive Carcinoma (TCGA, PanCancer Atlas)	1
TCGA-BH-A0H5	Breast Invasive Carcinoma (TCGA, PanCancer Atlas)	1
TCGA-BH-A0H6	Breast Invasive Carcinoma (TCGA, PanCancer Atlas)	1
TCGA-BH-A0H7	Breast Invasive Carcinoma (TCGA, PanCancer Atlas)	1
TCGA-BH-A0H9	Breast Invasive Carcinoma (TCGA, PanCancer Atlas)	1
TCGA-BH-A0HA	Breast Invasive Carcinoma (TCGA, PanCancer Atlas)	1
TCGA-BH-A0HB	Breast Invasive Carcinoma (TCGA, PanCancer Atlas)	1
TCGA-BH-A0HF	Breast Invasive Carcinoma (TCGA, PanCancer Atlas)	1
TCGA-BH-A0HI	Breast Invasive Carcinoma (TCGA, PanCancer Atlas)	1
TCGA-BH-A0HK	Breast Invasive Carcinoma (TCGA, PanCancer Atlas)	1
TCGA-BH-A0HO	Breast Invasive Carcinoma (TCGA, PanCancer Atlas)	1
TCGA-BH-A0HP	Breast Invasive Carcinoma (TCGA, PanCancer Atlas)	1
TCGA-BH-A0HQ	Breast Invasive Carcinoma (TCGA, PanCancer Atlas)	1
TCGA-BH-A0HW	Breast Invasive Carcinoma (TCGA, PanCancer Atlas)	1
TCGA-BH-A0HX	Breast Invasive Carcinoma (TCGA, PanCancer Atlas)	1
TCGA-BH-A0HY	Breast Invasive Carcinoma (TCGA, PanCancer Atlas)	1
TCGA-BH-A0RX	Breast Invasive Carcinoma (TCGA, PanCancer Atlas)	1
TCGA-BH-A0W3	Breast Invasive Carcinoma (TCGA, PanCancer Atlas)	1
TCGA-BH-A0W4	Breast Invasive Carcinoma (TCGA, PanCancer Atlas)	1
TCGA-BH-A0W5	Breast Invasive Carcinoma (TCGA, PanCancer Atlas)	1
TCGA-BH-A0W7	Breast Invasive Carcinoma (TCGA, PanCancer Atlas)	1
TCGA-BH-A1EN	Breast Invasive Carcinoma (TCGA, PanCancer Atlas)	1
TCGA-BH-A1EO	Breast Invasive Carcinoma (TCGA, PanCancer Atlas)	1
TCGA-BH-A1ES	Breast Invasive Carcinoma (TCGA, PanCancer Atlas)	1
TCGA-BH-A1ET	Breast Invasive Carcinoma (TCGA, PanCancer Atlas)	1
TCGA-BH-A1EU	Breast Invasive Carcinoma (TCGA, PanCancer Atlas)	1
TCGA-BH-A1EV	Breast Invasive Carcinoma (TCGA, PanCancer Atlas)	1
TCGA-BH-A1EW	Breast Invasive Carcinoma (TCGA, PanCancer Atlas)	1
TCGA-BH-A1EX	Breast Invasive Carcinoma (TCGA, PanCancer Atlas)	1
TCGA-BH-A1EY	Breast Invasive Carcinoma (TCGA, PanCancer Atlas)	1
TCGA-BH-A1F0	Breast Invasive Carcinoma (TCGA, PanCancer Atlas)	1
TCGA-BH-A1F2	Breast Invasive Carcinoma (TCGA, PanCancer Atlas)	1
TCGA-BH-A1F5	Breast Invasive Carcinoma (TCGA, PanCancer Atlas)	1
TCGA-BH-A1F6	Breast Invasive Carcinoma (TCGA, PanCancer Atlas)	1
TCGA-BH-A1F8	Breast Invasive Carcinoma (TCGA, PanCancer Atlas)	1
TCGA-BH-A1FC	Breast Invasive Carcinoma (TCGA, PanCancer Atlas)	1
TCGA-BH-A1FD	Breast Invasive Carcinoma (TCGA, PanCancer Atlas)	1
TCGA-BH-A1FE	Breast Invasive Carcinoma (TCGA, PanCancer Atlas)	1
TCGA-BH-A1FG	Breast Invasive Carcinoma (TCGA, PanCancer Atlas)	1
TCGA-BH-A1FH	Breast Invasive Carcinoma (TCGA, PanCancer Atlas)	1
TCGA-BH-A1FJ	Breast Invasive Carcinoma (TCGA, PanCancer Atlas)	1
TCGA-BH-A1FL	Breast Invasive Carcinoma (TCGA, PanCancer Atlas)	1
TCGA-BH-A1FM	Breast Invasive Carcinoma (TCGA, PanCancer Atlas)	1
TCGA-BH-A1FN	Breast Invasive Carcinoma (TCGA, PanCancer Atlas)	1
TCGA-BH-A1FR	Breast Invasive Carcinoma (TCGA, PanCancer Atlas)	1
TCGA-BH-A1FU	Breast Invasive Carcinoma (TCGA, PanCancer Atlas)	1
TCGA-BH-A2L8	Breast Invasive Carcinoma (TCGA, PanCancer Atlas)	1
TCGA-BH-A5IZ	Breast Invasive Carcinoma (TCGA, PanCancer Atlas)	1
TCGA-BH-A6R8	Breast Invasive Carcinoma (TCGA, PanCancer Atlas)	1
TCGA-BH-A6R9	Breast Invasive Carcinoma (TCGA, PanCancer Atlas)	1
TCGA-BH-A8FY	Breast Invasive Carcinoma (TCGA, PanCancer Atlas)	1
TCGA-BH-A8FZ	Breast Invasive Carcinoma (TCGA, PanCancer Atlas)	1
TCGA-BH-A8G0	Breast Invasive Carcinoma (TCGA, PanCancer Atlas)	1
TCGA-BH-A18F	Breast Invasive Carcinoma (TCGA, PanCancer Atlas)	1
TCGA-BH-A18G	Breast Invasive Carcinoma (TCGA, PanCancer Atlas)	1
TCGA-BH-A18I	Breast Invasive Carcinoma (TCGA, PanCancer Atlas)	1
TCGA-BH-A18J	Breast Invasive Carcinoma (TCGA, PanCancer Atlas)	1
TCGA-BH-A18K	Breast Invasive Carcinoma (TCGA, PanCancer Atlas)	1
TCGA-BH-A18L	Breast Invasive Carcinoma (TCGA, PanCancer Atlas)	1
TCGA-BH-A18M	Breast Invasive Carcinoma (TCGA, PanCancer Atlas)	1
TCGA-BH-A18N	Breast Invasive Carcinoma (TCGA, PanCancer Atlas)	1
TCGA-BH-A18P	Breast Invasive Carcinoma (TCGA, PanCancer Atlas)	1
TCGA-BH-A18Q	Breast Invasive Carcinoma (TCGA, PanCancer Atlas)	1
TCGA-BH-A18R	Breast Invasive Carcinoma (TCGA, PanCancer Atlas)	1
TCGA-BH-A18S	Breast Invasive Carcinoma (TCGA, PanCancer Atlas)	1
TCGA-BH-A18T	Breast Invasive Carcinoma (TCGA, PanCancer Atlas)	1
TCGA-BH-A18U	Breast Invasive Carcinoma (TCGA, PanCancer Atlas)	1
TCGA-BH-A18V	Breast Invasive Carcinoma (TCGA, PanCancer Atlas)	1
TCGA-BH-A28O	Breast Invasive Carcinoma (TCGA, PanCancer Atlas)	1
TCGA-BH-A28Q	Breast Invasive Carcinoma (TCGA, PanCancer Atlas)	1
TCGA-BH-A42T	Breast Invasive Carcinoma (TCGA, PanCancer Atlas)	1
TCGA-BH-A42U	Breast Invasive Carcinoma (TCGA, PanCancer Atlas)	1
TCGA-BH-A42V	Breast Invasive Carcinoma (TCGA, PanCancer Atlas)	1
TCGA-BH-AB28	Breast Invasive Carcinoma (TCGA, PanCancer Atlas)	1
TCGA-BH-A201	Breast Invasive Carcinoma (TCGA, PanCancer Atlas)	1
TCGA-BH-A202	Breast Invasive Carcinoma (TCGA, PanCancer Atlas)	1
TCGA-BH-A203	Breast Invasive Carcinoma (TCGA, PanCancer Atlas)	1
TCGA-BH-A204	Breast Invasive Carcinoma (TCGA, PanCancer Atlas)	1
TCGA-BH-A208	Breast Invasive Carcinoma (TCGA, PanCancer Atlas)	1
TCGA-BH-A209	Breast Invasive Carcinoma (TCGA, PanCancer Atlas)	1
TCGA-C8-A1HE	Breast Invasive Carcinoma (TCGA, PanCancer Atlas)	1
TCGA-C8-A1HF	Breast Invasive Carcinoma (TCGA, PanCancer Atlas)	1
TCGA-C8-A1HG	Breast Invasive Carcinoma (TCGA, PanCancer Atlas)	1
TCGA-C8-A1HI	Breast Invasive Carcinoma (TCGA, PanCancer Atlas)	1
TCGA-C8-A1HJ	Breast Invasive Carcinoma (TCGA, PanCancer Atlas)	1
TCGA-C8-A1HK	Breast Invasive Carcinoma (TCGA, PanCancer Atlas)	1
TCGA-C8-A1HL	Breast Invasive Carcinoma (TCGA, PanCancer Atlas)	1
TCGA-C8-A1HM	Breast Invasive Carcinoma (TCGA, PanCancer Atlas)	1
TCGA-C8-A1HN	Breast Invasive Carcinoma (TCGA, PanCancer Atlas)	1
TCGA-C8-A1HO	Breast Invasive Carcinoma (TCGA, PanCancer Atlas)	1
TCGA-C8-A3M7	Breast Invasive Carcinoma (TCGA, PanCancer Atlas)	1
TCGA-C8-A3M8	Breast Invasive Carcinoma (TCGA, PanCancer Atlas)	1
TCGA-C8-A8HP	Breast Invasive Carcinoma (TCGA, PanCancer Atlas)	1
TCGA-C8-A8HQ	Breast Invasive Carcinoma (TCGA, PanCancer Atlas)	1
TCGA-C8-A8HR	Breast Invasive Carcinoma (TCGA, PanCancer Atlas)	1
TCGA-C8-A9FZ	Breast Invasive Carcinoma (TCGA, PanCancer Atlas)	1
TCGA-C8-A12K	Breast Invasive Carcinoma (TCGA, PanCancer Atlas)	1
TCGA-C8-A12L	Breast Invasive Carcinoma (TCGA, PanCancer Atlas)	1
TCGA-C8-A12M	Breast Invasive Carcinoma (TCGA, PanCancer Atlas)	1
TCGA-C8-A12N	Breast Invasive Carcinoma (TCGA, PanCancer Atlas)	1
TCGA-C8-A12O	Breast Invasive Carcinoma (TCGA, PanCancer Atlas)	1
TCGA-C8-A12P	Breast Invasive Carcinoma (TCGA, PanCancer Atlas)	1
TCGA-C8-A12Q	Breast Invasive Carcinoma (TCGA, PanCancer Atlas)	1
TCGA-C8-A12T	Breast Invasive Carcinoma (TCGA, PanCancer Atlas)	1
TCGA-C8-A12U	Breast Invasive Carcinoma (TCGA, PanCancer Atlas)	1
TCGA-C8-A12V	Breast Invasive Carcinoma (TCGA, PanCancer Atlas)	1
TCGA-C8-A12W	Breast Invasive Carcinoma (TCGA, PanCancer Atlas)	1
TCGA-C8-A12X	Breast Invasive Carcinoma (TCGA, PanCancer Atlas)	1
TCGA-C8-A12Y	Breast Invasive Carcinoma (TCGA, PanCancer Atlas)	1
TCGA-C8-A12Z	Breast Invasive Carcinoma (TCGA, PanCancer Atlas)	1
TCGA-C8-A26V	Breast Invasive Carcinoma (TCGA, PanCancer Atlas)	1
TCGA-C8-A26W	Breast Invasive Carcinoma (TCGA, PanCancer Atlas)	1
TCGA-C8-A26X	Breast Invasive Carcinoma (TCGA, PanCancer Atlas)	1
TCGA-C8-A26Y	Breast Invasive Carcinoma (TCGA, PanCancer Atlas)	1
TCGA-C8-A26Z	Breast Invasive Carcinoma (TCGA, PanCancer Atlas)	1
TCGA-C8-A27A	Breast Invasive Carcinoma (TCGA, PanCancer Atlas)	1
TCGA-C8-A27B	Breast Invasive Carcinoma (TCGA, PanCancer Atlas)	1
TCGA-C8-A130	Breast Invasive Carcinoma (TCGA, PanCancer Atlas)	1
TCGA-C8-A131	Breast Invasive Carcinoma (TCGA, PanCancer Atlas)	1
TCGA-C8-A132	Breast Invasive Carcinoma (TCGA, PanCancer Atlas)	1
TCGA-C8-A133	Breast Invasive Carcinoma (TCGA, PanCancer Atlas)	1
TCGA-C8-A134	Breast Invasive Carcinoma (TCGA, PanCancer Atlas)	1
TCGA-C8-A135	Breast Invasive Carcinoma (TCGA, PanCancer Atlas)	1
TCGA-C8-A137	Breast Invasive Carcinoma (TCGA, PanCancer Atlas)	1
TCGA-C8-A138	Breast Invasive Carcinoma (TCGA, PanCancer Atlas)	1
TCGA-C8-A273	Breast Invasive Carcinoma (TCGA, PanCancer Atlas)	1
TCGA-C8-A274	Breast Invasive Carcinoma (TCGA, PanCancer Atlas)	1
TCGA-C8-A275	Breast Invasive Carcinoma (TCGA, PanCancer Atlas)	1
TCGA-C8-A278	Breast Invasive Carcinoma (TCGA, PanCancer Atlas)	1
TCGA-D8-A1J8	Breast Invasive Carcinoma (TCGA, PanCancer Atlas)	1
TCGA-D8-A1J9	Breast Invasive Carcinoma (TCGA, PanCancer Atlas)	1
TCGA-D8-A1JA	Breast Invasive Carcinoma (TCGA, PanCancer Atlas)	1
TCGA-D8-A1JB	Breast Invasive Carcinoma (TCGA, PanCancer Atlas)	1
TCGA-D8-A1JC	Breast Invasive Carcinoma (TCGA, PanCancer Atlas)	1
TCGA-D8-A1JD	Breast Invasive Carcinoma (TCGA, PanCancer Atlas)	1
TCGA-D8-A1JE	Breast Invasive Carcinoma (TCGA, PanCancer Atlas)	1
TCGA-D8-A1JF	Breast Invasive Carcinoma (TCGA, PanCancer Atlas)	1
TCGA-D8-A1JG	Breast Invasive Carcinoma (TCGA, PanCancer Atlas)	1
TCGA-D8-A1JH	Breast Invasive Carcinoma (TCGA, PanCancer Atlas)	1
TCGA-D8-A1JI	Breast Invasive Carcinoma (TCGA, PanCancer Atlas)	1
TCGA-D8-A1JJ	Breast Invasive Carcinoma (TCGA, PanCancer Atlas)	1
TCGA-D8-A1JK	Breast Invasive Carcinoma (TCGA, PanCancer Atlas)	1
TCGA-D8-A1JL	Breast Invasive Carcinoma (TCGA, PanCancer Atlas)	1
TCGA-D8-A1JM	Breast Invasive Carcinoma (TCGA, PanCancer Atlas)	1
TCGA-D8-A1JN	Breast Invasive Carcinoma (TCGA, PanCancer Atlas)	1
TCGA-D8-A1JP	Breast Invasive Carcinoma (TCGA, PanCancer Atlas)	1
TCGA-D8-A1JS	Breast Invasive Carcinoma (TCGA, PanCancer Atlas)	1
TCGA-D8-A1JT	Breast Invasive Carcinoma (TCGA, PanCancer Atlas)	1
TCGA-D8-A1JU	Breast Invasive Carcinoma (TCGA, PanCancer Atlas)	1
TCGA-D8-A1X5	Breast Invasive Carcinoma (TCGA, PanCancer Atlas)	1
TCGA-D8-A1X7	Breast Invasive Carcinoma (TCGA, PanCancer Atlas)	1
TCGA-D8-A1X8	Breast Invasive Carcinoma (TCGA, PanCancer Atlas)	1
TCGA-D8-A1X9	Breast Invasive Carcinoma (TCGA, PanCancer Atlas)	1
TCGA-D8-A1XA	Breast Invasive Carcinoma (TCGA, PanCancer Atlas)	1
TCGA-D8-A1XB	Breast Invasive Carcinoma (TCGA, PanCancer Atlas)	1
TCGA-D8-A1XC	Breast Invasive Carcinoma (TCGA, PanCancer Atlas)	1
TCGA-D8-A1XD	Breast Invasive Carcinoma (TCGA, PanCancer Atlas)	1
TCGA-D8-A1XF	Breast Invasive Carcinoma (TCGA, PanCancer Atlas)	1
TCGA-D8-A1XG	Breast Invasive Carcinoma (TCGA, PanCancer Atlas)	1
TCGA-D8-A1XJ	Breast Invasive Carcinoma (TCGA, PanCancer Atlas)	1
TCGA-D8-A1XK	Breast Invasive Carcinoma (TCGA, PanCancer Atlas)	1
TCGA-D8-A1XM	Breast Invasive Carcinoma (TCGA, PanCancer Atlas)	1
TCGA-D8-A1XO	Breast Invasive Carcinoma (TCGA, PanCancer Atlas)	1
TCGA-D8-A1XQ	Breast Invasive Carcinoma (TCGA, PanCancer Atlas)	1
TCGA-D8-A1XR	Breast Invasive Carcinoma (TCGA, PanCancer Atlas)	1
TCGA-D8-A1XS	Breast Invasive Carcinoma (TCGA, PanCancer Atlas)	1
TCGA-D8-A1XT	Breast Invasive Carcinoma (TCGA, PanCancer Atlas)	1
TCGA-D8-A1XU	Breast Invasive Carcinoma (TCGA, PanCancer Atlas)	1
TCGA-D8-A1XV	Breast Invasive Carcinoma (TCGA, PanCancer Atlas)	1
TCGA-D8-A1XW	Breast Invasive Carcinoma (TCGA, PanCancer Atlas)	1
TCGA-D8-A1XY	Breast Invasive Carcinoma (TCGA, PanCancer Atlas)	1
TCGA-D8-A1XZ	Breast Invasive Carcinoma (TCGA, PanCancer Atlas)	1
TCGA-D8-A1Y0	Breast Invasive Carcinoma (TCGA, PanCancer Atlas)	1
TCGA-D8-A1Y1	Breast Invasive Carcinoma (TCGA, PanCancer Atlas)	1
TCGA-D8-A1Y2	Breast Invasive Carcinoma (TCGA, PanCancer Atlas)	1
TCGA-D8-A1Y3	Breast Invasive Carcinoma (TCGA, PanCancer Atlas)	1
TCGA-D8-A3Z5	Breast Invasive Carcinoma (TCGA, PanCancer Atlas)	1
TCGA-D8-A3Z6	Breast Invasive Carcinoma (TCGA, PanCancer Atlas)	1
TCGA-D8-A4Z1	Breast Invasive Carcinoma (TCGA, PanCancer Atlas)	1
TCGA-D8-A13Y	Breast Invasive Carcinoma (TCGA, PanCancer Atlas)	1
TCGA-D8-A13Z	Breast Invasive Carcinoma (TCGA, PanCancer Atlas)	1
TCGA-D8-A27E	Breast Invasive Carcinoma (TCGA, PanCancer Atlas)	1
TCGA-D8-A27F	Breast Invasive Carcinoma (TCGA, PanCancer Atlas)	1
TCGA-D8-A27G	Breast Invasive Carcinoma (TCGA, PanCancer Atlas)	1
TCGA-D8-A27H	Breast Invasive Carcinoma (TCGA, PanCancer Atlas)	1
TCGA-D8-A27I	Breast Invasive Carcinoma (TCGA, PanCancer Atlas)	1
TCGA-D8-A27K	Breast Invasive Carcinoma (TCGA, PanCancer Atlas)	1
TCGA-D8-A27L	Breast Invasive Carcinoma (TCGA, PanCancer Atlas)	1
TCGA-D8-A27M	Breast Invasive Carcinoma (TCGA, PanCancer Atlas)	1
TCGA-D8-A27N	Breast Invasive Carcinoma (TCGA, PanCancer Atlas)	1
TCGA-D8-A27P	Breast Invasive Carcinoma (TCGA, PanCancer Atlas)	1
TCGA-D8-A27R	Breast Invasive Carcinoma (TCGA, PanCancer Atlas)	1
[truncated: 8,955 more rows]

## Sheet: PanCancer point mutations
Point mutations affecting LOXL2 gene
Study ID	Sample ID	Patient ID	Altered	LOXL2	LOXL2: MUT
acc_tcga_pan_can_atlas_2018	TCGA-OR-A5J5-01	TCGA-OR-A5J5	1	G525R	G525R
acc_tcga_pan_can_atlas_2018	TCGA-OR-A5KB-01	TCGA-OR-A5KB	1	X384_splice	X384_splice
blca_tcga_pan_can_atlas_2018	TCGA-XF-A9T5-01	TCGA-XF-A9T5	1	E445K	E445K
blca_tcga_pan_can_atlas_2018	TCGA-XF-A8HD-01	TCGA-XF-A8HD	1	E515K	E515K
blca_tcga_pan_can_atlas_2018	TCGA-XF-A8HH-01	TCGA-XF-A8HH	1	E664Q	E664Q
blca_tcga_pan_can_atlas_2018	TCGA-E7-A7XN-01	TCGA-E7-A7XN	1	Q63H	Q63H
blca_tcga_pan_can_atlas_2018	TCGA-ZF-AA4W-01	TCGA-ZF-AA4W	1	R338C	R338C
blca_tcga_pan_can_atlas_2018	TCGA-DK-AA6M-01	TCGA-DK-AA6M	1	R690C	R690C
blca_tcga_pan_can_atlas_2018	TCGA-E7-A6MD-01	TCGA-E7-A6MD	1	T146I	T146I
blca_tcga_pan_can_atlas_2018	TCGA-E7-A4IJ-01	TCGA-E7-A4IJ	1	W355*	W355*
brca_tcga_pan_can_atlas_2018	TCGA-5T-A9QA-01	TCGA-5T-A9QA	1	H67N	H67N
brca_tcga_pan_can_atlas_2018	TCGA-AQ-A0Y5-01	TCGA-AQ-A0Y5	1	K149N	K149N
brca_tcga_pan_can_atlas_2018	TCGA-D8-A27V-01	TCGA-D8-A27V	1	K759Sfs*9, D699Tfs*32	K759Sfs*9, D699Tfs*32
cesc_tcga_pan_can_atlas_2018	TCGA-2W-A8YY-01	TCGA-2W-A8YY	1	G738S, N293H	G738S, N293H
cesc_tcga_pan_can_atlas_2018	TCGA-VS-A953-01	TCGA-VS-A953	1	H32Q	H32Q
cesc_tcga_pan_can_atlas_2018	TCGA-VS-A9UJ-01	TCGA-VS-A9UJ	1	R441H	R441H
coadread_tcga_pan_can_atlas_2018	TCGA-AA-3811-01	TCGA-AA-3811	1	A54T	A54T
coadread_tcga_pan_can_atlas_2018	TCGA-CM-6162-01	TCGA-CM-6162	1	D524N	D524N
coadread_tcga_pan_can_atlas_2018	TCGA-AA-3510-01	TCGA-AA-3510	1	F407L	F407L
coadread_tcga_pan_can_atlas_2018	TCGA-AD-6895-01	TCGA-AD-6895	1	F635I	F635I
coadread_tcga_pan_can_atlas_2018	TCGA-G4-6586-01	TCGA-G4-6586	1	G232S	G232S
coadread_tcga_pan_can_atlas_2018	TCGA-AG-A002-01	TCGA-AG-A002	1	I217S	I217S
coadread_tcga_pan_can_atlas_2018	TCGA-DM-A1HB-01	TCGA-DM-A1HB	1	K759Sfs*9	K759Sfs*9
coadread_tcga_pan_can_atlas_2018	TCGA-AZ-4315-01	TCGA-AZ-4315	1	R189*	R189*
coadread_tcga_pan_can_atlas_2018	TCGA-AA-3956-01	TCGA-AA-3956	1	R196C	R196C
coadread_tcga_pan_can_atlas_2018	TCGA-AA-3856-01	TCGA-AA-3856	1	R253Q	R253Q
coadread_tcga_pan_can_atlas_2018	TCGA-AG-A02N-01	TCGA-AG-A02N	1	R253W	R253W
coadread_tcga_pan_can_atlas_2018	TCGA-AA-A00N-01	TCGA-AA-A00N	1	R257C	R257C
coadread_tcga_pan_can_atlas_2018	TCGA-AZ-6598-01	TCGA-AZ-6598	1	R566W	R566W
coadread_tcga_pan_can_atlas_2018	TCGA-A6-6653-01	TCGA-A6-6653	1	R690C	R690C
coadread_tcga_pan_can_atlas_2018	TCGA-AA-3986-01	TCGA-AA-3986	1	R71W	R71W
coadread_tcga_pan_can_atlas_2018	TCGA-AA-3977-01	TCGA-AA-3977	1	S359L	S359L
coadread_tcga_pan_can_atlas_2018	TCGA-AG-3893-01	TCGA-AG-3893	1	T151M	T151M
coadread_tcga_pan_can_atlas_2018	TCGA-D5-6930-01	TCGA-D5-6930	1	W460G	W460G
coadread_tcga_pan_can_atlas_2018	TCGA-AA-3663-01	TCGA-AA-3663	1	Y319C	Y319C
esca_tcga_pan_can_atlas_2018	TCGA-L5-A4ON-01	TCGA-L5-A4ON	1	R327*	R327*
esca_tcga_pan_can_atlas_2018	TCGA-L5-A4OI-01	TCGA-L5-A4OI	1	R98Q	R98Q
esca_tcga_pan_can_atlas_2018	TCGA-L5-A8NL-01	TCGA-L5-A8NL	1	T546I	T546I
esca_tcga_pan_can_atlas_2018	TCGA-L5-A4OW-01	TCGA-L5-A4OW	1	V302E	V302E
gbm_tcga_pan_can_atlas_2018	TCGA-06-5411-01	TCGA-06-5411	1	A93S	A93S
gbm_tcga_pan_can_atlas_2018	TCGA-06-5416-01	TCGA-06-5416	1	R198C, P21L	R198C, P21L
hnsc_tcga_pan_can_atlas_2018	TCGA-QK-A8Z7-01	TCGA-QK-A8Z7	1	D219E	D219E
hnsc_tcga_pan_can_atlas_2018	TCGA-CR-6481-01	TCGA-CR-6481	1	E491Q, S581L	E491Q, S581L
hnsc_tcga_pan_can_atlas_2018	TCGA-WA-A7GZ-01	TCGA-WA-A7GZ	1	E545K	E545K
hnsc_tcga_pan_can_atlas_2018	TCGA-CN-A6V1-01	TCGA-CN-A6V1	1	E659Q	E659Q
hnsc_tcga_pan_can_atlas_2018	TCGA-CV-7415-01	TCGA-CV-7415	1	G335W	G335W
hnsc_tcga_pan_can_atlas_2018	TCGA-F7-A624-01	TCGA-F7-A624	1	W742*, V74M	W742*, V74M
kich_tcga_pan_can_atlas_2018	TCGA-KN-8428-01	TCGA-KN-8428	1	G540R, V528M	G540R, V528M
kirc_tcga_pan_can_atlas_2018	TCGA-BP-4964-01	TCGA-BP-4964	1	E576A	E576A
kirc_tcga_pan_can_atlas_2018	TCGA-B0-5077-01	TCGA-B0-5077	1	V145I	V145I
kirp_tcga_pan_can_atlas_2018	TCGA-B1-A655-01	TCGA-B1-A655	1	P237L	P237L
laml_tcga_pan_can_atlas_2018	TCGA-AB-2808-03	TCGA-AB-2808	1	M263V	M263V
lgg_tcga_pan_can_atlas_2018	TCGA-DU-6392-01	TCGA-DU-6392	1	R447*, T151M, F760S, R595W	R447*, T151M, F760S, R595W
lihc_tcga_pan_can_atlas_2018	TCGA-G3-AAV0-01	TCGA-G3-AAV0	1	L123V	L123V
luad_tcga_pan_can_atlas_2018	TCGA-49-AAR9-01	TCGA-49-AAR9	1	A547V	A547V
luad_tcga_pan_can_atlas_2018	TCGA-86-8358-01	TCGA-86-8358	1	D524E	D524E
luad_tcga_pan_can_atlas_2018	TCGA-17-Z022-01	TCGA-17-Z022	1	E239D	E239D
luad_tcga_pan_can_atlas_2018	TCGA-99-8025-01	TCGA-99-8025	1	R59L	R59L
luad_tcga_pan_can_atlas_2018	TCGA-05-4396-01	TCGA-05-4396	1	W697L	W697L
lusc_tcga_pan_can_atlas_2018	TCGA-43-7656-01	TCGA-43-7656	1	G119R	G119R
lusc_tcga_pan_can_atlas_2018	TCGA-85-6561-01	TCGA-85-6561	1	G525V	G525V
lusc_tcga_pan_can_atlas_2018	TCGA-34-7107-01	TCGA-34-7107	1	K406*	K406*
ov_tcga_pan_can_atlas_2018	TCGA-04-1343-01	TCGA-04-1343	1	G155S	G155S
ov_tcga_pan_can_atlas_2018	TCGA-29-1769-01	TCGA-29-1769	1	R566L	R566L
ov_tcga_pan_can_atlas_2018	TCGA-24-1842-01	TCGA-24-1842	1	T591M	T591M
paad_tcga_pan_can_atlas_2018	TCGA-IB-7651-01	TCGA-IB-7651	1	L367M, R198H	L367M, R198H
prad_tcga_pan_can_atlas_2018	TCGA-EJ-5542-01	TCGA-EJ-5542	1	M263I	M263I
prad_tcga_pan_can_atlas_2018	TCGA-XK-AAIW-01	TCGA-XK-AAIW	1	R478H	R478H
sarc_tcga_pan_can_atlas_2018	TCGA-QC-A7B5-01	TCGA-QC-A7B5	1	E755K	E755K
skcm_tcga_pan_can_atlas_2018	TCGA-EE-A29B-06	TCGA-EE-A29B	1	D85N	D85N
skcm_tcga_pan_can_atlas_2018	TCGA-FR-A8YC-06	TCGA-FR-A8YC	1	E269K	E269K
skcm_tcga_pan_can_atlas_2018	TCGA-FS-A1ZQ-06	TCGA-FS-A1ZQ	1	E754K	E754K
skcm_tcga_pan_can_atlas_2018	TCGA-Z2-A8RT-06	TCGA-Z2-A8RT	1	E757K	E757K
skcm_tcga_pan_can_atlas_2018	TCGA-D3-A1Q6-06	TCGA-D3-A1Q6	1	F168L	F168L
skcm_tcga_pan_can_atlas_2018	TCGA-D3-A2JO-06	TCGA-D3-A2JO	1	F635L	F635L
skcm_tcga_pan_can_atlas_2018	TCGA-EE-A2MM-06	TCGA-EE-A2MM	1	G155C	G155C
skcm_tcga_pan_can_atlas_2018	TCGA-D3-A5GS-06	TCGA-D3-A5GS	1	G311R	G311R
skcm_tcga_pan_can_atlas_2018	TCGA-EE-A2M8-06	TCGA-EE-A2M8	1	G335W	G335W
skcm_tcga_pan_can_atlas_2018	TCGA-EE-A3JB-06	TCGA-EE-A3JB	1	G497R	G497R
skcm_tcga_pan_can_atlas_2018	TCGA-DA-A1HW-06	TCGA-DA-A1HW	1	G540E	G540E
skcm_tcga_pan_can_atlas_2018	TCGA-EE-A181-06	TCGA-EE-A181	1	G738C	G738C
skcm_tcga_pan_can_atlas_2018	TCGA-EE-A2ML-06	TCGA-EE-A2ML	1	G765W	G765W
skcm_tcga_pan_can_atlas_2018	TCGA-D3-A1Q5-06	TCGA-D3-A1Q5	1	H389Y	H389Y
skcm_tcga_pan_can_atlas_2018	TCGA-EB-A41A-01	TCGA-EB-A41A	1	H523Y	H523Y
skcm_tcga_pan_can_atlas_2018	TCGA-FS-A4F9-06	TCGA-FS-A4F9	1	H762L	H762L
skcm_tcga_pan_can_atlas_2018	TCGA-FS-A1ZM-06	TCGA-FS-A1ZM	1	H91Y	H91Y
skcm_tcga_pan_can_atlas_2018	TCGA-IH-A3EA-01	TCGA-IH-A3EA	1	L126F	L126F
skcm_tcga_pan_can_atlas_2018	TCGA-D3-A3CF-06	TCGA-D3-A3CF	1	M556I	M556I
skcm_tcga_pan_can_atlas_2018	TCGA-D3-A51G-06	TCGA-D3-A51G	1	P164S	P164S
skcm_tcga_pan_can_atlas_2018	TCGA-EE-A2MD-06	TCGA-EE-A2MD	1	P324H	P324H
skcm_tcga_pan_can_atlas_2018	TCGA-FW-A3R5-06	TCGA-FW-A3R5	1	P4L	P4L
skcm_tcga_pan_can_atlas_2018	TCGA-ER-A19P-06	TCGA-ER-A19P	1	Q586H, G386*	Q586H, G386*
skcm_tcga_pan_can_atlas_2018	TCGA-GN-A265-06	TCGA-GN-A265	1	Q602K	Q602K
skcm_tcga_pan_can_atlas_2018	TCGA-D9-A6EC-06	TCGA-D9-A6EC	1	R189*	R189*
skcm_tcga_pan_can_atlas_2018	TCGA-ER-A195-06	TCGA-ER-A195	1	R365K	R365K
skcm_tcga_pan_can_atlas_2018	TCGA-GN-A26C-01	TCGA-GN-A26C	1	R441S	R441S
skcm_tcga_pan_can_atlas_2018	TCGA-EE-A29S-06	TCGA-EE-A29S	1	R71W	R71W
skcm_tcga_pan_can_atlas_2018	TCGA-FS-A4FB-06	TCGA-FS-A4FB	1	S262F	S262F
skcm_tcga_pan_can_atlas_2018	TCGA-D3-A8GM-06	TCGA-D3-A8GM	1	S313L	S313L
skcm_tcga_pan_can_atlas_2018	TCGA-W3-AA1R-06	TCGA-W3-AA1R	1	T266I	T266I
skcm_tcga_pan_can_atlas_2018	TCGA-EB-A4P0-01	TCGA-EB-A4P0	1	T561I	T561I
skcm_tcga_pan_can_atlas_2018	TCGA-ER-A19W-06	TCGA-ER-A19W	1	V72A	V72A
skcm_tcga_pan_can_atlas_2018	TCGA-D3-A2JG-06	TCGA-D3-A2JG	1	W143C	W143C
skcm_tcga_pan_can_atlas_2018	TCGA-D3-A2JP-06	TCGA-D3-A2JP	1	W686L	W686L
skcm_tcga_pan_can_atlas_2018	TCGA-W3-AA1V-06	TCGA-W3-AA1V	1	X491_splice	X491_splice
skcm_tcga_pan_can_atlas_2018	TCGA-EB-A44O-01	TCGA-EB-A44O	1	X711_splice	X711_splice
stad_tcga_pan_can_atlas_2018	TCGA-BR-6452-01	TCGA-BR-6452	1	E754K, A584V, V476A, Y242H	E754K, A584V, V476A, Y242H
stad_tcga_pan_can_atlas_2018	TCGA-BR-4256-01	TCGA-BR-4256	1	F760Vfs*2	F760Vfs*2
stad_tcga_pan_can_atlas_2018	TCGA-BR-8591-01	TCGA-BR-8591	1	K759Sfs*9	K759Sfs*9
stad_tcga_pan_can_atlas_2018	TCGA-HU-A4H3-01	TCGA-HU-A4H3	1	K759Sfs*9, R198C	K759Sfs*9, R198C
stad_tcga_pan_can_atlas_2018	TCGA-CD-A4MG-01	TCGA-CD-A4MG	1	N728del	N728del
stad_tcga_pan_can_atlas_2018	TCGA-HU-A4G8-01	TCGA-HU-A4G8	1	R316W	R316W
stad_tcga_pan_can_atlas_2018	TCGA-BR-8487-01	TCGA-BR-8487	1	R566W	R566W
stad_tcga_pan_can_atlas_2018	TCGA-F1-6177-01	TCGA-F1-6177	1	R690H	R690H
stad_tcga_pan_can_atlas_2018	TCGA-BR-4257-01	TCGA-BR-4257	1	T266A	T266A
stad_tcga_pan_can_atlas_2018	TCGA-BR-8081-01	TCGA-BR-8081	1	V206M	V206M
stad_tcga_pan_can_atlas_2018	TCGA-FP-A4BE-01	TCGA-FP-A4BE	1	V229M	V229M
ucec_tcga_pan_can_atlas_2018	TCGA-EY-A1GK-01	TCGA-EY-A1GK	1	A485T	A485T
ucec_tcga_pan_can_atlas_2018	TCGA-AX-A0J1-01	TCGA-AX-A0J1	1	A488T	A488T
ucec_tcga_pan_can_atlas_2018	TCGA-B5-A11H-01	TCGA-B5-A11H	1	A554V	A554V
ucec_tcga_pan_can_atlas_2018	TCGA-FI-A2F4-01	TCGA-FI-A2F4	1	A584V	A584V
ucec_tcga_pan_can_atlas_2018	TCGA-EO-A22U-01	TCGA-EO-A22U	1	A92T	A92T
ucec_tcga_pan_can_atlas_2018	TCGA-FI-A2D0-01	TCGA-FI-A2D0	1	E69K	E69K
ucec_tcga_pan_can_atlas_2018	TCGA-A5-A0G1-01	TCGA-A5-A0G1	1	F166I	F166I
ucec_tcga_pan_can_atlas_2018	TCGA-E6-A1LX-01	TCGA-E6-A1LX	1	F168C	F168C
ucec_tcga_pan_can_atlas_2018	TCGA-AX-A1CE-01	TCGA-AX-A1CE	1	G155S	G155S
ucec_tcga_pan_can_atlas_2018	TCGA-D1-A103-01	TCGA-D1-A103	1	G232D, V95I	G232D, V95I
ucec_tcga_pan_can_atlas_2018	TCGA-BS-A0UA-01	TCGA-BS-A0UA	1	G311R	G311R
ucec_tcga_pan_can_atlas_2018	TCGA-AP-A1DK-01	TCGA-AP-A1DK	1	G382V	G382V
ucec_tcga_pan_can_atlas_2018	TCGA-AP-A0LM-01	TCGA-AP-A0LM	1	G525R	G525R
ucec_tcga_pan_can_atlas_2018	TCGA-DF-A2KV-01	TCGA-DF-A2KV	1	G677D	G677D
ucec_tcga_pan_can_atlas_2018	TCGA-AJ-A3EL-01	TCGA-AJ-A3EL	1	K212N	K212N
ucec_tcga_pan_can_atlas_2018	TCGA-A5-A2K5-01	TCGA-A5-A2K5	1	K225N	K225N
ucec_tcga_pan_can_atlas_2018	TCGA-EO-A22R-01	TCGA-EO-A22R	1	K225N	K225N
ucec_tcga_pan_can_atlas_2018	TCGA-AX-A05Z-01	TCGA-AX-A05Z	1	K225T	K225T
ucec_tcga_pan_can_atlas_2018	TCGA-AP-A051-01	TCGA-AP-A051	1	L100M, L435M	L100M, L435M
ucec_tcga_pan_can_atlas_2018	TCGA-DF-A2KU-01	TCGA-DF-A2KU	1	L18I	L18I
ucec_tcga_pan_can_atlas_2018	TCGA-BG-A222-01	TCGA-BG-A222	1	N415D	N415D
ucec_tcga_pan_can_atlas_2018	TCGA-AX-A3G8-01	TCGA-AX-A3G8	1	N578S	N578S
ucec_tcga_pan_can_atlas_2018	TCGA-BK-A6W3-01	TCGA-BK-A6W3	1	R189*	R189*
ucec_tcga_pan_can_atlas_2018	TCGA-FI-A2D5-01	TCGA-FI-A2D5	1	R196C	R196C
ucec_tcga_pan_can_atlas_2018	TCGA-AP-A1E0-01	TCGA-AP-A1E0	1	R380*	R380*
ucec_tcga_pan_can_atlas_2018	TCGA-A5-A0GI-01	TCGA-A5-A0GI	1	R478C	R478C
ucec_tcga_pan_can_atlas_2018	TCGA-AX-A3FT-01	TCGA-AX-A3FT	1	R598C	R598C
ucec_tcga_pan_can_atlas_2018	TCGA-AX-A2HD-01	TCGA-AX-A2HD	1	S171L	S171L
ucec_tcga_pan_can_atlas_2018	TCGA-BS-A0UF-01	TCGA-BS-A0UF	1	S171L	S171L
ucec_tcga_pan_can_atlas_2018	TCGA-AP-A056-01	TCGA-AP-A056	1	S171L, R522C	S171L, R522C
ucec_tcga_pan_can_atlas_2018	TCGA-AX-A0J0-01	TCGA-AX-A0J0	1	S359L	S359L
ucec_tcga_pan_can_atlas_2018	TCGA-BS-A0TA-01	TCGA-BS-A0TA	1	S401Vfs*149	S401Vfs*149
ucec_tcga_pan_can_atlas_2018	TCGA-EC-A24G-01	TCGA-EC-A24G	1	V339M, E755K	V339M, E755K
ucec_tcga_pan_can_atlas_2018	TCGA-B5-A0K9-01	TCGA-B5-A0K9	1	V83M	V83M
